# Supplementary material for: Impact of secondhand smoke exposure on cognitive function among middle-aged and older women in China: findings from three waves of the China Health and Retirement Longitudinal Study
Source: PubMed Central journal article supplement — BMJ Open. 2020 Nov 17;10(11):e039824. doi: 10.1136/bmjopen-2020-039824 (PMC7674084; doi:10.1136/bmjopen-2020-039824), 2020-11-17
Supplement: bmjopen-2020-039824.draft_revisions.pdf [file bmjopen-2020-039824.draft_revisions.pdf]

# BMJ Open

BMJ Open is committed to open peer review. As part of this commitment we make the peer review history of every article we publish publicly available.

When an article is published we post the peer reviewers' comments and the authors' responses online. We also post the versions of the paper that were used during peer review. These are the versions that the peer review comments apply to.

The versions of the paper that follow are the versions that were submitted during the peer review process. They are not the versions of record or the final published versions. They should not be cited or distributed as the published version of this manuscript.

BMJ Open is an open access journal and the full, final, typeset and author-corrected version of record of the manuscript is available on our site with no access controls, subscription charges or pay-per-view fees (<http://bmjopen.bmj.com>).

If you have any questions on BMJ Open's open peer review process please email [info.bmjopen@bmj.com](mailto:info.bmjopen@bmj.com)

# BMJ Open

## Exposure to Secondhand Smoke and Cognitive Function Among Middle-aged and Older Women in China: Findings of 3-waves of the China Health and Retirement Longitudinal Study

|                               |                                                                                                                                                                                                                              |
|-------------------------------|------------------------------------------------------------------------------------------------------------------------------------------------------------------------------------------------------------------------------|
| Journal:                      | <i>BMJ Open</i>                                                                                                                                                                                                              |
| Manuscript ID                 | bmjopen-2020-039824                                                                                                                                                                                                          |
| Article Type:                 | Original research                                                                                                                                                                                                            |
| Date Submitted by the Author: | 27-Apr-2020                                                                                                                                                                                                                  |
| Complete List of Authors:     | Bai, Anying; Peking University Health Science Centre, School of Public Health;<br>Jin, Yinzi; Peking University, School of Public Health<br>Huang, Yangmu; Peking University Health Science Centre, School of Public Health; |
| Keywords:                     | EPIDEMIOLOGY, Dementia < NEUROLOGY, PUBLIC HEALTH                                                                                                                                                                            |
|                               |                                                                                                                                                                                                                              |

SCHOLARONE™  
Manuscripts

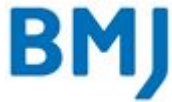

I, the Submitting Author has the right to grant and does grant on behalf of all authors of the Work (as defined in the below author licence), an exclusive licence and/or a non-exclusive licence for contributions from authors who are: i) UK Crown employees; ii) where BMJ has agreed a CC-BY licence shall apply, and/or iii) in accordance with the terms applicable for US Federal Government officers or employees acting as part of their official duties; on a worldwide, perpetual, irrevocable, royalty-free basis to BMJ Publishing Group Ltd ("BMJ") its licensees and where the relevant Journal is co-owned by BMJ to the co-owners of the Journal, to publish the Work in this journal and any other BMJ products and to exploit all rights, as set out in our [licence](#).

The Submitting Author accepts and understands that any supply made under these terms is made by BMJ to the Submitting Author unless you are acting as an employee on behalf of your employer or a postgraduate student of an affiliated institution which is paying any applicable article publishing charge ("APC") for Open Access articles. Where the Submitting Author wishes to make the Work available on an Open Access basis (and intends to pay the relevant APC), the terms of reuse of such Open Access shall be governed by a Creative Commons licence – details of these licences and which [Creative Commons](#) licence will apply to this Work are set out in our licence referred to above.

Other than as permitted in any relevant BMJ Author's Self Archiving Policies, I confirm this Work has not been accepted for publication elsewhere, is not being considered for publication elsewhere and does not duplicate material already published. I confirm all authors consent to publication of this Work and authorise the granting of this licence.

**Title**

Exposure to Secondhand Smoke and Cognitive Function Among  
Middle-aged and Older Women in China: Findings of 3-waves  
of the China Health and Retirement Longitudinal Study

Anying, Bai <sup>1</sup>, Yinzi Jin Ph.D.<sup>1</sup>, Yangmu Huang Ph.D.<sup>1</sup>

<sup>1</sup> School of Public Health, Peking University Health and  
Science Centre

Corresponding Author:

Yangmu Huang, Ph.D.

Peking University Health and Science Centre, School of  
Public Health

Xueyuan Road No.38, Haidian Distreet, BeiJing, China

Tel: 15010376131

Fax: 010-62755782

Email: ymhuang@bjmu.edu.cn

## Abstract

**Objectives:** To examine the association between passive smoking and women's global cognitive function and cognitive subdomains.

**Design:** Cohort study

**Participants:** Data for this study were obtained from the China Health and Retirement Longitudinal Study (CHARLS), and panel data analysis was applied to wave 1 and wave 2 (2011–2013), wave 2 and wave 3 (2013–2015) and wave 1 and wave 3 (2011–2015). Data from a total of 6875 Chinese women were selected for analysis, including 2981 who were interviewed in 2011, 2471 in 2013, and 1894 in 2015.

### **Primary and secondary outcome measures:**

Global cognitive function, domains of cognitive function including visuospatial ability, orientation and attention, and episodic memory could be assessed by various sections of CHARLS questionnaire.

**Results:** Passive smoking was found to be significantly associated with cognitive function. Compared with those had not been exposed to household secondhand smoking, women who had lived with a smoking husband for over 40

1  
2  
3  
4 years had significantly faster cognition decline,  
5  
6 especially in visuospatial ability(95%CI, -0.08--0.01 P <  
7  
8 0.05) and episodic memory function(95%CI, -0.31-- -0.01 P =  
9  
10 0.031). In addition, compared with individuals with lower  
11  
12 educational levels, and residing in rural area, those  
13  
14 with more education or living in urban area had higher  
15  
16 cognitive scores, although exposed to SHS.  
17  
18  
19  
20  
21

22 **Conclusions:** Passive smoking within households is a risk  
23  
24 factor for cognitive decline among Chinese non-smoking  
25  
26 women. Provision of more educational opportunities and  
27  
28 screening for depressive symptoms in advance for Chinese  
29  
30 women should be promoted, as these will also help to  
31  
32 protect them against the negative effects brought on by  
33  
34 passive smoking.  
35  
36  
37  
38  
39

40 **Key words:** aging; passive smoking; panel analysis;  
41  
42 visuospatial ability; memory  
43  
44

45 **Strengths and limitations of this study:**  
46

- 47  
48 ➤ The first study to investigate on the association  
49  
50 between secondhand smoke exposure and women's different  
51  
52 domains of cognitive functions in China using a 4-year  
53  
54 longitudinal national representative data.  
55  
56  
57  
58 ➤ Addressed the issue of reverse causation in observational cohort studies by used  
59  
60

1  
2  
3  
4 lagged dependent variable models and adjust for baseline cognition scores  
5

- 6  
7 ➤ The exposure to secondhand smoke was evaluated based on  
8  
9 self-report measures.  
10  
11 ➤ The analyses only contained household SHS exposure and  
12  
13 excluding environmental exposure.  
14  
15  
16  
17  
18  
19

20 **Word Count: 3361**

21  
22 **Number of references:30**

23  
24 **Number of data elements :1**  
25  
26  
27  
28  
29  
30  
31  
32  
33  
34  
35  
36  
37

### 38 **Introduction**

39  
40 China's population has been ageing rapidly. By 2050,  
41  
42 there will be 400 million Chinese citizens aged over 65  
43  
44 years old, and 150 million of whom will be older than 80  
45  
46 years old(Fang, Scheibye-Knudsen et al. 2015), which  
47  
48 brought about formidable healthcare challenges. It will  
49  
50 become increasingly important to understand the cognitive  
51  
52 changes that accompany aging, both normally and  
53  
54 pathologically(Harada, Natelson Love et al. 2013).  
55  
56  
57  
58  
59  
60

1  
2  
3  
4 Cognitive impairment, described as a decline in  
5  
6 intellectual functions (Robertson, Savva et al. 2013),  
7  
8 ranges from mild forms of forgetfulness to severe and  
9  
10 debilitating dementia and is common among the elderly (Yin,  
11  
12 Ma et al. 2016). The prevalence of cognitive impairment is  
13  
14 rising, with national figures estimating that around 9% of  
15  
16 older persons in China had cognitive impairment in 2011 (Yin,  
17  
18 Ma et al. 2016).

19  
20 Numerous determinants such as environmental, individual,  
21  
22 and genetic factors could favor evolution toward cognitive  
23  
24 impairment, and both age and late-life hypertension  
25  
26 increase the risk of dementia over time (Bernardin, Maheut-  
27  
28 Bosser et al. 2014). The mechanism lies in age-related  
29  
30 functional and structural changes in cerebrovascular small  
31  
32 and large blood vessels (Tadic, Cuspidi et al. 2016).  
33  
34 Besides chronic diseases factors, depression has long been  
35  
36 known to affect memory and other neurocognitive domains,  
37  
38 and be associated with an increased risk of developing mild  
39  
40 cognitive impairment (MCI) in cognitively normal elderly  
41  
42 people (Taivalantti, Barnett et al. 2019).

43  
44 Passive smoking is a heated public health issue in China.  
45  
46 Exposure to secondhand smoke (SHS), also known as "passive  
47  
48  
49  
50  
51  
52  
53  
54  
55  
56  
57  
58  
59  
60



1  
2  
3  
4 smoking," refers to a situation where a non-smoker inhales  
5  
6 another person's smoke either by exposure to side stream  
7  
8 smoke or mainstream smoke (Ling and Heffernan 2016). Current  
9  
10 smoking prevalence in China decreased from 31.1% in 2002  
11  
12 to 28.1% in 2010; however, the number of adults exposed to  
13  
14 secondhand smoking during this period still increased from  
15  
16 540 million to 556 million (Harada, Natelson Love et al.  
17  
18 2013). The negative health effects of high levels of  
19  
20 exposure to SHS may be close to those of active smoking,  
21  
22 including inferior performance on measures of general  
23  
24 intelligence, visuospatial learning and memory and fine  
25  
26 motor dexterity (Durazzo, Meyerhoff et al. 2012). Given the  
27  
28 association between exposure to SHS and risk factors for  
29  
30 cognitive impairment such as cardiovascular disease (Teo,  
31  
32 Ounpuu et al. 2006), hypertension (Kim, 2019), and stroke  
33  
34 (Malek, 2015) it is possible that high level of exposure  
35  
36 may be a preventable risk factor for cognitive impairment  
37  
38 or dementia (Heffernan and O'Neill 2013). A cross-sectional  
39  
40 research including 150 samples conducted in the North East  
41  
42 of England revealed that participants who had no history  
43  
44 of smoking and averagely exposed to SHS for around 6 years,  
45  
46 showed significantly reduced performance in processing  
47  
48  
49  
50  
51  
52  
53  
54  
55  
56  
57  
58  
59  
60

1  
2  
3  
4 speed (i.e. how quickly one can process information and  
5  
6 perform tasks) and executive function(i.e. the ability to  
7  
8 organize memory, cognitive flexibility, and problem-  
9  
10 solving ability) as compared with non-exposed  
11  
12 people(Heffernan and O'Neill 2013). Such an inversed  
13  
14 relationship between environment tobacco smoke exposure and  
15  
16 visuospatial reasoning skills were also reported among  
17  
18 children and adolescents(Yolton, Dietrich et al. 2005).  
19  
20 Besides, a longitudinal aging study concerning 4809  
21  
22 samples(aged 50 years or older) had found that participants  
23  
24 were about 30 percent more likely to develop dementia when  
25  
26 exposed to SHS over a period of six years, compared with  
27  
28 those who never having been exposed; while this association  
29  
30 did not reach statistical significance after adjusting for  
31  
32 age, sex, and education ( $P>0.05$ )(Llewellyn, Lang et al.  
33  
34 2009).

35  
36  
37  
38  
39  
40  
41  
42  
43  
44  
45 Few studies, however, have investigated the  
46  
47 relationship between household SHS exposure and different  
48  
49 domains of cognitive function among elders. Previous  
50  
51 studies of active smoking and cognitive impairment among  
52  
53 the Chinese population suggested that older current  
54  
55 smokers(aged 63 years old on average)(Yolton, Dietrich et  
56  
57  
58  
59  
60

1  
2  
3  
4 al. 2005) or those being exposed to SHS (aged between 55-64  
5  
6 years old) (Pan, Luo et al. 2018) were more likely to develop  
7  
8 cognitive impairment compared with never-smokers.  
9  
10 Nevertheless, both of them used only a 2-wave longitudinal  
11  
12 data and did not control for baseline cognition score.  
13  
14 Therefore, the primary aim of this study was to investigate  
15  
16 the relationship between secondhand smoking and cognitive  
17  
18 function among older non-smoking Chinese women, using a 3-  
19  
20 wave longitudinal national representative data. Through the  
21  
22 classification of respondents by different years of  
23  
24 secondhand smoke exposure in a 4-year panel, we identified  
25  
26 whether certain high SHS exposure groups were at higher  
27  
28 risk of cognitive decline than others after controlling for  
29  
30 demographic and socioeconomic factors. Besides, we aimed  
31  
32 to examine the association between secondhand smoke  
33  
34 exposure and cognitive subdomains. This is especially  
35  
36 important given the escalating aging trend and increasing  
37  
38 prevalence of SHS exposure in China.  
39  
40  
41  
42  
43  
44  
45  
46  
47  
48  
49  
50  
51  
52  
53  
54  
55

## 56 **Methods**

### 57 **Data**

1  
2  
3  
4 We used data from 3 waves of the China Health and  
5  
6 Retirement Longitudinal Study (CHARLS, 2011-2013-2015),  
7  
8 which involved participants with a nationally  
9  
10 representative survey of adults aged 45 years or older, as  
11  
12 well as their spouses when possible. The CHARLS includes  
13  
14 assessments of social, economic, and health circumstances  
15  
16 of community-residents. The national baseline survey was  
17  
18 conducted between June 2011 and March 2012 and included  
19  
20 17,708 respondents from 10,257 households. CHARLS  
21  
22 respondents were followed every 2 years, using a face-to-  
23  
24 face computer-assisted personal interview (CAPI) (Zhao, Hu  
25  
26 et al. 2012). At baseline there was 3381 married women who  
27  
28 never smoked cigarettes and lived with spouses who had  
29  
30 either smoked cigarettes in the past or smoked at the time  
31  
32 of interview. Besides, all the data for each variable have  
33  
34 been collected for those respondents. Our final sample was  
35  
36 composed of 6875 respondents, among them 2802 were  
37  
38 interviewed again during the second wave of data collection  
39  
40 in 2013, and 2247 were interviewed again during the third  
41  
42 wave in 2015. The similar sample selection process was  
43  
44 conducted for participants in the second wave in 2013 as  
45  
46 baseline, and final sample was consisted of 1799 women who  
47  
48  
49  
50  
51  
52  
53  
54  
55  
56  
57  
58  
59  
60

1  
2  
3  
4 were investigated again in 2015 as participants.  
5  
6  
7

## 8 **Measures**

### 10 ***Secondhand Smoke***

11  
12 Based on standardized CHARLS questionnaire, the exposure  
13 to SHS among Chinese women was assessed through several  
14 surveys, asking the participants about their current  
15 marital status, the exact year they got married, and the  
16 years the husband in each household has begun or ceased  
17 smoking at home.  
18  
19  
20  
21  
22  
23  
24  
25  
26  
27

28 The smoking status section contained four questions:  
29  
30 "Have you ever chewed tobacco, smoked a pipe, smoked self-  
31 rolled cigarettes, or smoked cigarettes/cigars?", "Do you  
32 still have the habit or have you totally quit?", "At what  
33 age did you totally quit smoking?" and "At what age did you  
34 start to smoke on a regular basis?". If the answer to the  
35 first question was "yes", they were defined as "current  
36 smokers". Our analysis of SHS exposure focused only on  
37 nonsmokers excluding the "current smokers", because of the  
38 difficulty to differentiate the negative effects of active  
39 smoking on health condition from that of SHS exposure. The  
40 length of SHS exposure was calculated and expressed as the  
41 total number of years that never-smoking women spent living  
42  
43  
44  
45  
46  
47  
48  
49  
50  
51  
52  
53  
54  
55  
56  
57  
58  
59  
60

1  
2  
3  
4 with their spouses who smoked cigarettes at home. Based on  
5  
6 the constructed SHS exposure variable, the participants  
7  
8 were classified into four different groups: Never or being  
9  
10 exposed to secondhand smoke for less than 25 years, more  
11  
12 than 25 years and less than 30 years, more than 30 years  
13  
14 and less than 40 years and over 40 years.  
15  
16  
17  
18

### 19 ***Cognitive function***

20  
21  
22 Cognitive functions were measured from Telephone  
23  
24 Interview of Cognition Status form (self-rated memory,  
25  
26 today's date, day of the week, and current season); recall  
27  
28 and delayed recall test of memory of 10 words; test of  
29  
30 serial subtractions of 7 from 100; ability to reproduce a  
31  
32 picture of two overlapped pentagons in CHARLS  
33  
34 questionnaires (Zhao, 2012. Cognitive subdomains including  
35  
36 visuospatial ability, orientation and attention, and  
37  
38 episodic memory (Ge, Wei et al. 2018) could be assessed by  
39  
40 these various sections of questionnaire. The Telephone  
41  
42 Interview of Cognitive Status (TICS) is a 10-item screening  
43  
44 test for the assessment of cognitive function in patients  
45  
46 with Alzheimer's disease who are unwilling or unable to be  
47  
48 examined in person. To assess orientation and attention  
49  
50 function, the number of correct answers to above questions  
51  
52  
53  
54  
55  
56  
57  
58  
59  
60

1  
2  
3  
4 was scored and summed up (range 0 to 10). Figure drawing  
5  
6 was used to measure a person's ability to identify visual  
7  
8 and spatial relationships among objects. Participants who  
9  
10 successfully completed the task received a score of 1, and  
11  
12 those who failed received 0 (Ge, Wei et al. 2018).  
13  
14  
15

16  
17 In addition, the word recall test was consisted of 2  
18  
19 components, immediate recall and delayed recall, and  
20  
21 evaluated episodic memory. Participants were required to  
22  
23 immediately repeat 10 Chinese nouns just read to them, and  
24  
25 after 20 questions concerning CES-D (approximately 4 to 10  
26  
27 minutes), they were again asked to recall as many of the  
28  
29 original words as possible. The item was coded as 1 if  
30  
31 recalled by the respondent, and as 0 if not. Scores for  
32  
33 immediate and delayed recall both varied from 0 to 10. An  
34  
35 evaluated episodic memory score was calculated using the  
36  
37 mean of scores in immediate and delayed word recall (range  
38  
39 0 to 10) (Li, Cacchione et al. 2017).  
40  
41  
42  
43  
44  
45  
46  
47

48 The overall cognition scores were the sum of the three  
49  
50 different domains (range 0 to 21).  
51

### 52 53 **Control variables**

54  
55 Given that cognitive function may vary across  
56  
57 demographic and socioeconomic status, we thus included age,  
58  
59  
60

1  
2  
3  
4 urban/rural residence, education, annual household  
5  
6 expenditures, chronic diseases and depressive symptoms as  
7  
8 control variables. Education was categorized into 3 groups:  
9  
10 "illiterate", "primary education" and "secondary education  
11  
12 or above". Arterial hypertension and diabetes mellitus are  
13  
14 separately strong independent risk factors for the  
15  
16 development of cognitive impairment and dementia(Tadic,  
17  
18 Cuspidi et al. 2016) (Moheet, Mangia et al. 2015). Thus,  
19  
20 the baseline condition of hypertension and diabetes were  
21  
22 included, in addition to whether the participants were  
23  
24 being treated. The measure of depressive symptoms was based  
25  
26 on the 10-item version of the Center for Epidemiologic  
27  
28 Studies Depression Scale(CES-D) short form, and each of the  
29  
30 4-option response to item was scored ranging from 0 to 3.  
31  
32 The total score is the sum of points for all 10 items, and  
33  
34 a score of 10 or higher suggests the presence of depressive  
35  
36 symptoms(Cheng, Chen et al. 2016).  
37  
38  
39  
40  
41  
42  
43  
44  
45  
46  
47  
48  
49  
50

### 51 **Analysis**

52  
53 All analyses were conducted with STATA, version 14.0  
54  
55 (Stata, College Station, TX, USA).We used lagged dependent-  
56  
57 variable regression models with ordinary least squares  
58  
59  
60



1  
2  
3  
4 estimation. In the LDV method, covariation both between and  
5  
6 within waves is used to estimate the coefficients, yielding  
7  
8 more stable estimates and lower standard errors than those  
9  
10 found in other methods, such as the change score (CS)  
11  
12 methods (Johnson 2005). After pooling the three sets of  
13  
14 panel data into one through using the "year" dummy variable  
15  
16 to differentiate between change in 2 years or in 4 years,  
17  
18 we have 6875 respondents who have complete data on all  
19  
20 variables. The overall cognitive scores, episodic memory  
21  
22 scores, visuospatial ability scores and orientation and  
23  
24 attention scores were 4 separate outcome variables. The  
25  
26 different groups of SHS exposure years were the predictor  
27  
28 variable, and other independent variables included all  
29  
30 demographic and socioeconomic characteristics. Prior to  
31  
32 fitting the regression models, descriptive analyses were  
33  
34 conducted to estimate the mean and standard deviations for  
35  
36 continuous data and frequencies and percentages for  
37  
38 categorical data.  
39  
40  
41  
42  
43  
44  
45  
46  
47  
48  
49  
50

## 51 **Results**

52  
53  
54 Table 1 provides a descriptive summary of all the  
55  
56 variables for participants from each panel of three  
57  
58 different waves: 2011-2013, 2011-2015 and 2013-2015. High  
59  
60

1  
2  
3  
4 prevalence of SHS exposure between 30 to 40 years were seen  
5  
6 in different panels, accounting for 32.51%, 35.18% and  
7  
8 42.69% respectively.  
9

10  
11 The participants were over 45 years old, with the  
12  
13 average age of 56, 56 and 58 years old, respectively in  
14  
15 those waves . Participants were more likely to live in  
16  
17 rural area, have lower education background and do not have  
18  
19 hypertension or diabetes symptoms at baseline. In addition,  
20  
21 our results indicated that the average baseline cognition  
22  
23 scores were higher than wave-2 and wave-3 cognition scores.  
24  
25 The average scores of CES-D indicated high prevalence of  
26  
27 depression among Chinese middle-aged and old-aged women in  
28  
29 those years. Other socio-demographic characteristics of the  
30  
31 respondents are shown in Table 1  
32  
33  
34  
35  
36  
37  
38  
39

40 Results from the regression models for the  
41  
42 relationship between SHS exposure and each domain of  
43  
44 cognitive function and overall cognition scores are  
45  
46 reported in Table 2 and Table 3. Scores of episodic  
47  
48 memory, orientation and attention and visuospatial among  
49  
50 respondents at baseline were strong predictors of their  
51  
52 corresponding cognitive function measures 2 or 4 years  
53  
54 later. Based on the analysis controlling age, annual  
55  
56  
57  
58  
59  
60

1  
2  
3  
4 household expenditure, education, baseline cognitive  
5  
6 function and other chronic health status, we found that  
7  
8  
9 only being exposed to SHS for more than 40 years  
10  
11 significantly resulted in a decline in visuospatial  
12  
13 abilities, episodic memory and overall cognition scores  
14  
15 for all respondents. Compared with respondents who were  
16  
17 not exposed to SHS or being exposed to it for less than  
18  
19 25 years, those who have exposed to SHS for more than 40  
20  
21 years suffered a 0.04-point decline in visuospatial  
22  
23 abilities (95%CI, -0.08--0.01 P <0.1), a 0.16-point decline in  
24  
25 episodic memory (95%CI, -0.31--0.01 P <0.05), and a 0.33-point  
26  
27 decline in overall cognition functions (95%CI, -0.66--0.01 P  
28  
29 <0.01). In addition, age was also a strong indicator. Each  
30  
31 one-year older resulted in a 0.01-point, 0.01-point,  
32  
33 0.03-point, 0.05-point decrease in visuospatial (95%CI, -  
34  
35 0.01--0.00 P <0.01), orientation (95%CI, -0.03--0.01 P <0.01),  
36  
37 memory (95%CI, -0.31--0.01 P <0.05) and overall cognition  
38  
39 scores (95%CI, -0.66--0.01 P <0.01), respectively. High  
40  
41 education level was associated with better cognitive  
42  
43 performance, especially in orientation and attention.  
44  
45 What's more, a one-point increase in CESD scores decrease  
46  
47 0.02-point decrease in scores of orientation and  
48  
49  
50  
51  
52  
53  
54  
55  
56  
57  
58  
59  
60

1  
2  
3  
4 attention(95%CI, -0.03--0.00 P <0.05), showing that  
5  
6 respondents with depressive symptoms were more likely to  
7  
8 suffer from cognitive decline in specific functions.  
9  
10

## 11 **Discussion**

12  
13  
14 Results from this longitudinal study with a large,  
15  
16 representative sample of middle-aged and older women in  
17  
18 China indicated that exposure to secondhand smoke for over  
19  
20 40 years was associated with significantly poorer  
21  
22 performance of global cognition and cognitive subdomains.  
23  
24 It is the first examination of cognitive subdomains in  
25  
26 relation to household SHS exposure using a 4-year  
27  
28 longitudinal data in China. The inferior performance of  
29  
30 passive smokers on measures of visuospatial abilities,  
31  
32 episodic memory and orientation and attention abilities are  
33  
34 creative as these domains were not specifically evaluated  
35  
36 in earlier studies with middle-aged and older samples who  
37  
38 never smoke(Durazzo, Meyerhoff et al. 2012).Previous study  
39  
40 only suggested that secondhand smoke was associated with  
41  
42 poorer cognitive performance specifically in children,  
43  
44 adolescents and adults(Yolton, Dietrich et al. 2005).  
45  
46 Besides, we found that having a high educational level,  
47  
48 living in urban area and having better baseline cognitive  
49  
50  
51  
52  
53  
54  
55  
56  
57  
58  
59  
60

1  
2  
3  
4 function would improve their cognitive performance.  
5  
6 Compared with those without diabetes, participants with  
7  
8 diabetes in baseline were found to have a 0.172-point  
9  
10 decline in episodic memory scores, whereas the exact type  
11  
12 of diabetes could not be examined in our study. An early  
13  
14 finding showed that people with both type 1 and type 2  
15  
16 diabetes had mild to moderate reductions in cognitive  
17  
18 function compared to non-diabetic controls as measured by  
19  
20 neuropsychological testing, while type 2 diabetes (T2DM),  
21  
22 but not type 1 diabetes, has been associated with 50%  
23  
24 increased risk of dementia (Moheet, Mangia et al. 2015).  
25  
26  
27  
28  
29  
30  
31

32 Our results showed that compared with women who have  
33  
34 never been exposed to SHS or being exposed for less than  
35  
36 20 years, those who was exposed to SHS for more than 40  
37  
38 years have experienced, on average, 0.04-point, 0.16-point  
39  
40 and 0.33-point decline in scores of visuospatial function,  
41  
42 episodic memory and overall cognitive scores, respectively.  
43  
44 Compared with prior research (Pan, Luo et al. 2018), the  
45  
46 coefficients were significant. Besides, each one-year  
47  
48 increase in age resulted in a 0.01-point, 0.02-point, 0.04-  
49  
50 point, 0.06-point decrease in visuospatial, orientation,  
51  
52 memory and overall cognition scores, respectively.  
53  
54  
55  
56  
57  
58  
59  
60

1  
2  
3  
4 Secondhand smoke seems to be a stronger indicator of  
5  
6 cognitive decline than aging. Study had reported that  
7  
8 attention referred to the ability to concentrate and focus  
9  
10 on specific stimuli slightly declined in later life (Lezak,  
11  
12 M; Howieson, D, 2012), and orientation was one's ability  
13  
14 to identify exact date, month, day and season of the year.  
15  
16 Our results did not signify the relationship between SHS  
17  
18 and orientation and attention ability may due to the  
19  
20 relatively small size of sample and short period of cohort  
21  
22 study after controlling for all demographic and  
23  
24 socioeconomic confounders. Visuospatial abilities involve  
25  
26 the ability to understand space in two and three dimensions.  
27  
28 A nationally representative data concerning 5683 children  
29  
30 and adolescents who were 6-16 years in America showed that  
31  
32 years of SHS exposure was significantly associated with  
33  
34 lower scores for reading, math, and visuospatial skills,  
35  
36 after adjusting for covariates (Yolton, Dietrich et al.  
37  
38 2005). In our study, an inversed relationship between SHS  
39  
40 exposure and visuospatial abilities among middle-aged and  
41  
42 older adults was also presented, showing a 0.04-point  
43  
44 decline in their visuospatial scores. As one of the most  
45  
46 common cognitive complaints among elders, episodic memory  
47  
48  
49  
50  
51  
52  
53  
54  
55  
56  
57  
58  
59  
60

1  
2  
3  
4 refers to personally experienced events which could be  
5  
6 measured by stories, word lists or figures. Previous study  
7  
8 proved that the onset of memory decline may vary among  
9  
10 different memory types, with episodic memory lasting  
11  
12 lifelong (Rönnlund, M; Nyberg, L.2005). Our study could not  
13  
14 prove the onset age of memory decline without doing  
15  
16 regression among different age groups, while the memory  
17  
18 decline caused by SHS could be presented by the significant  
19  
20 coefficient.  
21  
22  
23  
24  
25

26  
27 The inconsistent conclusions between our studies and  
28  
29 prior ones may probably due to the relatively simplified  
30  
31 version of cognition test procedure in CHARLS  
32  
33 questionnaires compared with the MoCA(Li, Jia et al. 2018)  
34  
35 and MMSE(Trzepacz, Hochstetler et al. 2015). Some studies  
36  
37 also used clinical or magnetic resonance imaging (MRI)  
38  
39 evidence of neurologic damage to detect cognitive  
40  
41 impairment (Kalb R,etal2018). Best adapted to a screening test,  
42  
43 the MoCA exhibited excellent sensitivity in identifying MCI  
44  
45 and AD(Alzheimer's disease) by 90% and 100%, respectively  
46  
47 (Ziad S. Nasreddine 2005).  
48  
49  
50  
51  
52  
53  
54

55  
56 The most popular hypothesis about the mechanisms  
57  
58 underlying the links between SHS exposure and poorer  
59  
60

1  
2  
3  
4 cognitive performance lies in the notion that the carbon  
5  
6 monoxide (CO) in tobacco smoke may interfere with the  
7  
8 oxygen being delivered to the brain via the blood system,  
9  
10 which could be tested by measuring levels of CO in the  
11  
12 blood of never smokers who have been exposed to SHS and  
13  
14 comparing these with never smokers with no history of such  
15  
16 exposure. However, the reasons behind different effect on  
17  
18 various domains of brain function are far from clear. One  
19  
20 possible explanation derives from an animal research. It  
21  
22 may lead to reduced neuronal mass in specific regions of  
23  
24 the brain associated with learning and memory after  
25  
26 exposing animals to varying degrees of toxic mixtures of  
27  
28 chemicals found in tobacco smoke. Since the hippocampal  
29  
30 region of the brain is known to be involved in the  
31  
32 mediation of memory(Staples and Mandyam 2016) and learning,  
33  
34 further research should be conducted in other regions  
35  
36 dominating visuospatial and orientation ability. Another  
37  
38 possible mechanism is that prolonged exposure to SHS may  
39  
40 be a significant risk factor for cardiovascular disease  
41  
42 (Yankelevitz, Henschke et al. 2013), which may therefore  
43  
44 lead to a range of health and cognitive problems in later  
45  
46 life. A longitudinal design could elucidate this  
47  
48  
49  
50  
51  
52  
53  
54  
55  
56  
57  
58  
59  
60



1  
2  
3  
4 association by observing long-term exposure to SHS and a  
5  
6 potential build-up of CVD as well as how these correlates  
7  
8  
9 with performance upon a range of cognitive measures.

10  
11 Several limitations need to be considered when  
12  
13 interpreting this study and designing future studies.  
14  
15 Firstly, the exposure to secondhand smoke was evaluated  
16  
17 based on self-report measures. This might be subject to  
18  
19 recall bias and led to over-or-underestimation of  
20  
21 exposure (Ling and Heffernan 2016). Therefore, further  
22  
23 studies could include more biological assays, for example,  
24  
25 cotinine residue levels or nicotine residue in saliva or  
26  
27 hair samples (Akhtar, Andresen et al. 2013). Previous  
28  
29 research using serum cotinine as a biomarker of exposure  
30  
31 to SHS found that higher levels of serum cotinine were  
32  
33 associated with significant reductions in performance in  
34  
35 reading, mathematics, and visual and spatial abilities in  
36  
37 children and adolescents (Yolton, Dietrich et al. 2005).  
38  
39 However, no studies had used a combination of biomarker and  
40  
41 self-report yet (Stirland, O'Shea et al. 2018). Cognitive  
42  
43 impairment could also be detected by the effect of  
44  
45 apolipoprotein  $\epsilon 4$  (Apo  $\epsilon 4$ ) polymorphism, which was a known  
46  
47 risk factor for dementia. Secondly, it may be impossible  
48  
49  
50  
51  
52  
53  
54  
55  
56  
57  
58  
59  
60

1  
2  
3  
4 to control for all potentially confounding variables. After  
5  
6 adjusting for age, household expenditure, education, area,  
7  
8 chronic health condition and depressive symptoms, some  
9  
10 other demographic or socioeconomic confounders may be  
11  
12 neglected. Nevertheless, this did not appear to affect the  
13  
14 magnitude of the association between SHS exposure and  
15  
16 cognition (Chen, Clifford et al. 2013). Besides, the analyses  
17  
18 only contained household SHS exposure, which precludes the  
19  
20 analyses of the influence of environment smoke inhale on  
21  
22 smoking proclivity. Whether exposure to household SHS can  
23  
24 hasten the onset of cognitive impairment for older Chinese  
25  
26 women could be further proved by running regression models  
27  
28 in different age groups.  
29  
30  
31  
32  
33  
34  
35  
36  
37

### 38 **Acknowledgments :**

39  
40 We would like to thank the professor Yaohui Zhao at Centre for Chinese Economic  
41  
42 Research, Peking University for her thoughtful contributions to this study.  
43  
44

### 45 **Conflict of Interest**

46  
47  
48 The authors have no conflicts of interest to declare.  
49

### 50 **Author's Contribution**

51  
52  
53 Anying Bai wrote and participated in all aspects of this research, including the field  
54  
55 investigation. Dr Yangmu Huang reviewed and supervised this research. Yinzi Jin  
56  
57 participated in the statistical analysis of this work and reviewed the final article.  
58  
59  
60

### Data sharing statement

CHARLS data is available to the public online : <http://charls.pku.edu.cn>

### Funding Resources

This is a self-funded research.

### References

Akhtar, W. Z., et al. (2013). "Association of blood cotinine level with cognitive and physical performance in non-smoking older adults." *Environmental Research* 121: 64-70. doi : 10.1016/j.envres.

Bernardin, F., et al. (2014). "Cognitive Impairments in Alcohol-Dependent Subjects." *Frontiers in Psychiatry* 5. doi : 10.3389/fpsyt.2014.00078

.Chen, R., et al. (2013). "Is exposure to secondhand smoke associated with cognitive parameters of children and adolescents?-a systematic literature review." *Annals of Epidemiology* 23(10): 652-661. doi : 10.1016/j.annepidem.2013.07.001

Chen, Z., et al. (2015). "Contrasting male and female trends in tobacco-attributed mortality in China: evidence from successive nationwide prospective cohort studies."

1  
2  
3  
4 The Lancet 386(10002): 1447-1456.doi : 10.1016/S0140-6736(15)00340-2  
5  
6  
7

8  
9 Cheng, H. G., et al. (2016). "Prospective relationship of depressive symptoms, drinking,  
10 and tobacco smoking among middle-aged and elderly community-dwelling adults:  
11 Results from the China Health and Retirement Longitudinal Study (CHARLS)." J  
12 Affect Disord 195: 136-143.doi : 10.1016/j.jad.2016.02.023  
13  
14  
15  
16  
17  
18

19  
20  
21  
22 Durazzo, T. C., et al. (2012). "A comprehensive assessment of neurocognition in  
23 middle-aged chronic cigarette smokers." Drug Alcohol Depend 122(1-2): 105-111.doi :  
24 10.1016/j.drugalcdep.2011.09.019  
25  
26  
27  
28  
29

30  
31  
32 Fang, E. F., et al. (2015). "A research agenda for aging in China in the 21st century."  
33 Ageing Research Reviews 24: 197-205.doi : 10.1016/j.arr.2015.08.003  
34  
35  
36  
37

38  
39  
40 Harada, C. N., et al. (2013). "Normal Cognitive Aging." Clinics in Geriatric Medicine  
41 29(4): 737-752.doi : 10.1016/j.cger.2013.07.002  
42  
43  
44  
45

46  
47  
48 Heffernan, T. M. and T. S. O'Neill (2013). "Everyday prospective memory and  
49 executive function deficits associated with exposure to second-hand smoke." J Addict  
50 2013: 160486.doi : 10.1155/2013/160486  
51  
52  
53  
54

55  
56  
57  
58 Johnson, D. (2005). "Two-Wave Panel Analysis- Comparing Statistical Methods for  
59  
60

1  
2  
3  
4 Studying the Effects of Transitions." *Journal of Marriage and Family* 67: 1061-1075. doi :  
5  
6 10.1111/j.1741-3737.2005.00194.x  
7  
8

9  
10  
11 Kalb R, Beier M, Benedict RH, et al. Recommendations for cognitive screening and  
12 management in multiple sclerosis care. *Mult Scler.* 2018;24(13):1665–1680.  
13  
14  
15  
16  
17 doi:10.1177/1352458518803785  
18

19  
20  
21  
22 Lei, X., et al. (2014). "Gender Differences in Cognition in China and Reasons for  
23 Change over Time: Evidence from CHARLS." *J Econ Ageing* 4: 46-55. doi :  
24  
25  
26  
27 10.1016/j.jeoa.2013.11.001  
28

29  
30  
31  
32 Li, J., et al. (2017). "Afternoon Napping and Cognition in Chinese Older Adults:  
33 Findings from the China Health and Retirement Longitudinal Study Baseline  
34  
35  
36  
37  
38  
39  
40  
41  
42  
43  
44  
45  
46  
47  
48  
49  
50  
51  
52  
53  
54  
55  
56  
57  
58  
59  
60  
Assessment." *J Am Geriatr Soc* 65(2): 373-380. doi : 10.1111/jgs.14368

43  
44  
45  
46  
47  
48  
49  
50  
51  
52  
53  
54  
55  
56  
57  
58  
59  
60  
Li, X., et al. (2018). "The role of the Montreal Cognitive Assessment (MoCA) and its  
memory tasks for detecting mild cognitive impairment." *Neurol Sci* 39(6): 1029-  
1034. doi : 10.1007/s10072-018-3319-0

53  
54  
55  
56  
57  
58  
59  
60  
Ling, J. and T. Heffernan (2016). "The Cognitive Deficits Associated with Second-  
Hand Smoking." *Frontiers in Psychiatry* 7. doi : 10.3389/fpsy.2016.00046

1  
2  
3  
4 Llewellyn, D. J., et al. (2009). "Exposure to secondhand smoke and cognitive  
5  
6 impairment in non-smokers: national cross sectional study with cotinine measurement."  
7  
8  
9 Bmj 338(feb12 2): b462-b462.doi : 10.1136/bmj.b462  
10

11  
12  
13  
14 Moheet, A., et al. (2015). "Impact of diabetes on cognitive function and brain structure."  
15  
16  
17 Annals of the New York Academy of Sciences 1353(1): 60-71.doi :  
18  
19 10.1111/nyas.12807  
20  
21

22  
23  
24 Pan, X., et al. (2018). "Secondhand Smoke and Women's Cognitive Function in China."  
25  
26  
27 American Journal of Epidemiology 187(5): 911-918.doi : 10.1093/aje/kwx377  
28  
29

30  
31  
32 Rönnlund, M., Nyberg, L., Bäckman, L., & Nilsson, L.-G. (2005). Stability, Growth,  
33  
34 and Decline in Adult Life Span Development of Declarative Memory: Cross-Sectional  
35  
36 and Longitudinal Data From a Population-Based Study. Psychology and Aging, 20(1),  
37  
38 3-18.doi : 10.1037/0882-7974.20.1.3  
39  
40  
41

42  
43  
44  
45 Robertson, D. A., et al. (2013). "Frailty and cognitive impairment--a review of the  
46  
47 evidence and causal mechanisms." Ageing Res Rev 12(4): 840-851.doi :  
48  
49 10.1016/j.arr.2013.06.004  
50  
51

52  
53  
54  
55  
56 Staples, M. C. and C. D. Mandyam (2016). "Thinking after Drinking: Impaired  
57  
58 Hippocampal-Dependent Cognition in Human Alcoholics and Animal Models of  
59  
60

1  
2  
3  
4 Alcohol Dependence." *Frontiers in Psychiatry* 7.doi : 10.3389/fpsy.2016.00162  
5  
6  
7

8  
9 Stirland, L. E., et al. (2018). "Passive smoking as a risk factor for dementia and  
10 cognitive impairment: systematic review of observational studies." *Int Psychogeriatr*  
11  
12 30(8): 1177-1187.doi : 10.1017/S1041610217002824  
13  
14  
15  
16

17  
18  
19 Tadic, M., et al. (2016). "Hypertension and cognitive dysfunction in elderly: blood  
20 pressure management for this global burden." *BMC Cardiovasc Disord* 16(1): 208.  
21  
22  
23  
24  
25  
26  
27  
28  
29  
30  
31  
32  
33  
34  
35  
36  
37  
38  
39  
40  
41  
42  
43  
44  
45  
46  
47  
48  
49  
50  
51  
52  
53  
54  
55  
56  
57  
58  
59  
60

30  
31  
32  
33  
34  
35  
36  
37  
38  
39  
40  
41  
42  
43  
44  
45  
46  
47  
48  
49  
50  
51  
52  
53  
54  
55  
56  
57  
58  
59  
60

37  
38  
39  
40  
41  
42  
43  
44  
45  
46  
47  
48  
49  
50  
51  
52  
53  
54  
55  
56  
57  
58  
59  
60

48  
49  
50  
51  
52  
53  
54  
55  
56  
57  
58  
59  
60

1  
2  
3  
4 Yankelevitz, D. F., et al. (2013). "Second-Hand Tobacco Smoke in Never Smokers Is  
5  
6 a Significant Risk Factor for Coronary Artery Calcification." *JACC: Cardiovascular*  
7  
8  
9 *Imaging* 6(6): 651-657.doi : 10.1016/j.jcmg.2013.02.004  
10

11  
12  
13  
14 Yin, P., et al. (2016). "Chronic obstructive pulmonary disease and cognitive impairment  
15  
16 in the Chinese elderly population: a large national survey." *International Journal of*  
17  
18 *Chronic Obstructive Pulmonary Disease*. doi : 10.2147/COPD.S96237  
19  
20  
21

22  
23  
24  
25 Yolton, K., et al. (2005). "Exposure to environmental tobacco smoke and cognitive  
26  
27 abilities among U.S. children and adolescents." *Environ Health Perspect* 113(1): 98-  
28  
29 103.doi : 10.1289/ehp.7210  
30  
31

32  
33  
34  
35 Zhao, Y., et al. (2012). "Cohort Profile: The China Health and Retirement Longitudinal  
36  
37 Study (CHARLS)." *International Journal of Epidemiology* 43(1): 61-68.doi :  
38  
39 10.1093/ije/dys203  
40  
41

42  
43  
44  
45 Ziad S. Nasreddine, M. (2005). "The Montreal Cognitive Assessment (MoCA)-  
46  
47 Concept and Clinical Review." *the American Geriatrics Society* 53(4): 695-699.  
48  
49  
50 doi : /10.1111/j.1532-5415.2005.53221.x  
51  
52



Table 1. Characteristics of the Participants from 3 waves of CHARLS, 2011-2013-2015

| Variable                                  | 2011-2013<br>(N=2802) |           | 2011-2015<br>(N=2274) |           | 2013-2015<br>(N=1799) |           |
|-------------------------------------------|-----------------------|-----------|-----------------------|-----------|-----------------------|-----------|
|                                           | Count                 | Frequency | Count                 | Frequency | Count                 | Frequency |
| <b>Area</b>                               |                       |           |                       |           |                       |           |
| Urban                                     | 981                   | 35.01%    | 730                   | 32.10%    | 556                   | 30.91%    |
| Rural                                     | 1821                  | 64.99%    | 1544                  | 67.90%    | 1243                  | 69.09%    |
| <b>Secondhand Smoke</b>                   |                       |           |                       |           |                       |           |
| Less than 25 years                        | 759                   | 27.09%    | 531                   | 23.35%    | 262                   | 14.56%    |
| More than 25 years and less than 30 years | 634                   | 22.63%    | 573                   | 25.20%    | 385                   | 21.40%    |
| More than 30 years and less than 40 years | 911                   | 32.51%    | 800                   | 35.18%    | 768                   | 42.69%    |
| More than 40 years                        | 498                   | 17.77%    | 370                   | 16.27%    | 384                   | 21.35%    |
| <b>Education</b>                          |                       |           |                       |           |                       |           |
| Illiterate                                | 1552                  | 55.39%    | 1309                  | 57.56%    | 1004                  | 55.81%    |
| Primary education                         | 512                   | 18.27%    | 414                   | 18.21%    | 336                   | 18.68%    |
| Secondary or above                        | 738                   | 26.34%    | 551                   | 24.23%    | 459                   | 25.51%    |
| <b>Hypertension</b>                       |                       |           |                       |           |                       |           |
| No hypertension                           | 2124                  | 75.80%    | 1720                  | 75.64%    | 1365                  | 75.88%    |
| Hypertension with treatment               | 522                   | 18.63%    | 1720                  | 75.64%    | 358                   | 19.90%    |
| Hypertension without treatment            | 156                   | 5.57%     | 130                   | 5.72%     | 76                    | 4.22%     |
| <b>Diabetes</b>                           |                       |           |                       |           |                       |           |
| No Diabetes in baseline                   | 2643                  | 94.33%    | 2140                  | 94.11%    | 1704                  | 94.72%    |

|                                                 |       |                     |       |                     |       |                     |
|-------------------------------------------------|-------|---------------------|-------|---------------------|-------|---------------------|
| Have Diabetes with treatment                    | 143   | 5.10%               | 120   | 5.28%               | 86    | 4.78%               |
| Have Diabetes without treatment                 | 16    | 0.57%               | 14    | 0.62%               | 9     | 0.50%               |
|                                                 | Count | Mean (SD)           | Count | Mean (SD)           | Count | Mean (SD)           |
| Age                                             | 2802  | 55.84 (8.22)        | 2274  | 56.19 (7.75)        | 1799  | 57.90 (7.43)        |
| Annual Household Expenditure, yuan <sup>a</sup> | 2802  | 13786.99 (14197.29) | 2274  | 13060.14 (13639.33) | 1799  | 16632.84 (18568.24) |
| Visuospatial ability <sup>b</sup>               | 2802  | 0.51 (0.50)         | 2274  | 0.48 (0.50)         | 1799  | 0.49 (0.50)         |
| Orientation and attention <sup>c</sup>          | 2802  | 5.87 (3.29)         | 2274  | 5.84 (3.19)         | 1799  | 5.97 (3.14)         |
| Memory Scores <sup>d</sup>                      | 2802  | 3.33 (1.96)         | 2274  | 3.04 (1.93)         | 1799  | 3.15 (1.91)         |
| Baseline Visuospatial ability                   | 2802  | 0.57 (0.50)         | 2274  | 0.55 (0.50)         | 1799  | 0.54 (0.50)         |
| Baseline Orientation and attention              | 2802  | 6.39 (2.92)         | 2274  | 6.25 (2.90)         | 1799  | 6.16 (3.00)         |
| Baseline Memory Scores                          | 2802  | 3.27 (1.98)         | 2274  | 3.23 (1.92)         | 1799  | 3.50 (1.78)         |
| Baseline CES-D Score <sup>e</sup>               | 2802  | 12.09 (5.38)        | 2274  | 12.13 (5.45)        | 1799  | 10.90 (5.14)        |

Abbreviation: SHS, secondhand smoke.

a 1 US dollar = 6.3 yuan.

b The score range for visuospatial ability was 0-1.

c The score range for orientation and attention was 0-10. Higher scores indicate better mental status.

d The score range for episodic memory was 0-10. Higher scores indicate better memory function.

e A score of 10 or greater indicated the presence of depressive symptoms.

1  
2  
3  
4  
5  
6  
7  
8  
9  
10  
11  
12  
13  
14  
15  
16  
17  
18  
19  
20  
21  
22  
23  
24  
25  
26  
27  
28  
29  
30  
31  
32  
33  
34  
35  
36  
37  
38  
39  
40  
41  
42  
43  
44  
45  
46

Table 2. Multivariable linear regression analysis of the relationship between smoking exposure and Visuospatial function and Orientation and Attention among older Chinese women (N = 6875), 2011-2013-2015

| VARIABLES                                    | Visuospatial Scores |              |       | Orientation and Attention |              |       |
|----------------------------------------------|---------------------|--------------|-------|---------------------------|--------------|-------|
|                                              | $\beta$ coefficient | 95%CI        | t     | $\beta$ coefficient       | 95%CI        | t     |
| <b>Age</b>                                   | -0.01 <sup>a</sup>  | -0.01, -0.00 | -6.73 | -0.02 <sup>a</sup>        | -0.03, -0.01 | -4.34 |
| <b>Expenditure</b>                           | 0.00                | 0.00, 0.00   | 0.01  | 0.00 <sup>a</sup>         | 0.00, 0.00   | 0.77  |
| <b>Secondhand Smoke Exposure<sup>d</sup></b> |                     |              |       |                           |              |       |
| <b>More than 25 years less than 30 years</b> | -0.01               | -0.04, 0.02  | -0.72 | 0.05                      | -0.12, 0.21  | 0.56  |
| <b>More than 30 years less than 40 years</b> | -0.02               | -0.05, 0.02  | -0.95 | -0.03                     | -0.20, 0.13  | -0.38 |
| <b>More than 40 years</b>                    | -0.04 <sup>c</sup>  | -0.08, 0.01  | -1.67 | -0.15                     | -0.38, 0.09  | -1.24 |
| <b>Baseline Visuospatial Scores</b>          | 0.23 <sup>a</sup>   | 0.21, 0.26   | 17.93 |                           |              |       |
| <b>Baseline Orientation Scores</b>           |                     |              |       | 0.55 <sup>a</sup>         | 0.53, 0.57   | 44.86 |

|                                 |                    |             |       |                    |              |       |
|---------------------------------|--------------------|-------------|-------|--------------------|--------------|-------|
| Urban <sup>e</sup>              | 0.06 <sup>a</sup>  | 0.04, 0.09  | 5.27  | 0.38 <sup>a</sup>  | 0.25, 0.51   | 5.72  |
| <b>Education<sup>f</sup></b>    |                    |             |       |                    |              |       |
| Primary                         | 0.23 <sup>a</sup>  | 0.20, 0.26  | 14.00 | 1.11 <sup>a</sup>  | 0.94, 1.27   | 12.91 |
| Secondary or Above              | 0.29 <sup>a</sup>  | 0.26, 0.32  | 18.51 | 1.18 <sup>a</sup>  | 1.01, 1.36   | 13.44 |
| <b>Hypertension<sup>g</sup></b> |                    |             |       |                    |              |       |
| With Treatment                  | -0.03              | -0.09, 0.02 | -1.20 | 0.06               | -0.24, 0.35  | -0.38 |
| Without Treatment               | -0.02              | -0.06, 0.03 | -0.69 | 0.06               | -0.11, 0.24  | 0.04  |
| Missing Group                   | -0.05 <sup>c</sup> | -0.12, 0.01 | -1.67 | 0.06               | -0.19, 0.30  | -0.01 |
| <b>Diabetes<sup>h</sup></b>     |                    |             |       |                    |              |       |
| With Treatment                  | 0.02               | -0.03, 0.07 | 0.90  | 0.25 <sup>c</sup>  | -0.03, 0.52  | -1.77 |
| Without Treatment               | 0.03               | -0.04, 0.09 | 0.82  | 0.21               | -0.06, 0.48  | -0.23 |
| Missing Group                   | 0.07               | -0.08, 0.21 | 0.88  | 0.50               | -0.22, 1.23  | 0.67  |
| <b>Baseline CES-D Score</b>     |                    |             |       |                    |              |       |
|                                 | -0.00 <sup>c</sup> | -0.00, 0.00 | -1.71 | -0.02 <sup>b</sup> | -0.03, -0.00 | -2.57 |
| <b>year = 2</b>                 |                    |             |       |                    |              |       |
|                                 | -0.02              | -0.04, 0.01 | -1.58 | 0.09               | -0.05, 0.22  | 1.29  |

Abbreviations: CI, confidence interval; SHS, secondhand smoke.

1  
2  
3  
4  
5  
6  
7  
8  
9  
10  
11  
12  
13  
14  
15  
16  
17  
18  
19  
20  
21  
22  
23  
24  
25  
26  
27  
28  
29  
30  
31  
32  
33  
34  
35  
36  
37  
38  
39  
40  
41  
42  
43  
44  
45  
46

- a.  $p < 0.01$
- b.  $p < 0.05$
- c.  $p < 0.1$
- d. Referent: No SHS exposure or Less than 25 years.
- e. Expenditure is expressed as the natural log of the annual household expenditure
- f. Referent: Illiterate
- g. Referent: Without hypertension
- h. Referent: Without diabetes

For peer review only

Table 3. Multivariable linear regression analysis of the relationship between smoking exposure and Episodic memory and Overall cognitive function among older Chinese women (N = 6875), 2011-2013-2015

| VARIABLES                                    | Episodic Memory        |              |        | Overall Cognition Scores |              |       |
|----------------------------------------------|------------------------|--------------|--------|--------------------------|--------------|-------|
|                                              | $\beta$<br>coefficient | 95%CI        | t      | $\beta$ coefficient      | 95%CI        | t     |
| <b>Age</b>                                   | -0.04 <sup>a</sup>     | -0.05, -0.03 | -11.37 | -0.06 <sup>a</sup>       | -0.07, -0.04 | -7.87 |
| <b>Expenditure</b>                           | 0.00                   | 0.00, 0.00   | 1.30   | 0.00 <sup>a</sup>        | 0.00, 0.00   | 0.32  |
| <b>Secondhand Smoke Exposure<sup>d</sup></b> |                        |              |        |                          |              |       |
| <b>More than 25 years less than 30 years</b> | -0.04                  | -0.16, 0.08  | -0.67  | -0.01                    | -0.25, 0.25  | -0.01 |
| <b>More than 30 years less than 40 years</b> | 0.02                   | -0.09, 0.13  | 0.36   | -0.05                    | -0.29, 0.19  | -0.41 |
| <b>More than 40 years</b>                    | -0.16 <sup>b</sup>     | -0.31, -0.01 | -2.06  | -0.33 <sup>a</sup>       | -0.66, 0.01  | -1.93 |
| <b>Baseline Memory Scores</b>                | 0.30 <sup>a</sup>      | 0.28, 0.32   | 25.22  |                          |              |       |

|    |                                  |                    |              |       |                   |             |       |
|----|----------------------------------|--------------------|--------------|-------|-------------------|-------------|-------|
| 1  |                                  |                    |              |       |                   |             |       |
| 2  |                                  |                    |              |       |                   |             |       |
| 3  |                                  |                    |              |       |                   |             |       |
| 4  |                                  |                    |              |       |                   |             |       |
| 5  | <b>Baseline Cognition Scores</b> |                    |              |       | 0.55 <sup>a</sup> | 0.46, 0.83  | 44.95 |
| 6  |                                  |                    |              |       |                   |             |       |
| 7  | <b>Urban<sup>e</sup></b>         | 0.25 <sup>a</sup>  | 0.16, 0.34   | 5.60  | 0.65 <sup>a</sup> | 0.46, 0.83  | 6.68  |
| 8  |                                  |                    |              |       |                   |             |       |
| 9  |                                  |                    |              |       |                   |             |       |
| 10 | <b>Education<sup>f</sup></b>     |                    |              |       |                   |             |       |
| 11 | <b>Primary</b>                   | 0.70 <sup>a</sup>  | 0.58, 0.80   | 12.42 | 1.77 <sup>a</sup> | 1.53, 2.02  | 14.28 |
| 12 |                                  |                    |              |       |                   |             |       |
| 13 |                                  |                    |              |       |                   |             |       |
| 14 | <b>Secondary or Above</b>        | 0.97 <sup>a</sup>  | 0.86, 1.08   | 17.29 | 2.00 <sup>a</sup> | 1.74, 2.26  | 15.24 |
| 15 |                                  |                    |              |       |                   |             |       |
| 16 |                                  |                    |              |       |                   |             |       |
| 17 | <b>Hypertension<sup>g</sup></b>  |                    |              |       |                   |             |       |
| 18 | <b>With Treatment</b>            | 0.04               | -0.16, 0.23  | 0.35  | 0.13              | -0.29, 0.56 | 0.62  |
| 19 |                                  |                    |              |       |                   |             |       |
| 20 | <b>Without Treatment</b>         | 0.06               | -0.06, 0.17  | 0.95  | 0.12              | -0.14, 0.38 | 0.93  |
| 21 |                                  |                    |              |       |                   |             |       |
| 22 |                                  |                    |              |       |                   |             |       |
| 23 | <b>Missing Group</b>             | 0.07               | -0.12, 0.25  | 0.70  | 0.10              | -0.27, 0.47 | 0.52  |
| 24 |                                  |                    |              |       |                   |             |       |
| 25 |                                  |                    |              |       |                   |             |       |
| 26 | <b>Diabetes<sup>h</sup></b>      |                    |              |       |                   |             |       |
| 27 | <b>With Treatment</b>            | -0.20 <sup>b</sup> | -0.38, 0.02  | -2.20 | -0.04             | -0.43, 0.36 | 0.62  |
| 28 |                                  |                    |              |       |                   |             |       |
| 29 | <b>Without Treatment</b>         | -0.07              | -0.25, 0.11  | -0.77 | 0.08              | -0.30, 0.47 | 0.43  |
| 30 |                                  |                    |              |       |                   |             |       |
| 31 |                                  |                    |              |       |                   |             |       |
| 32 | <b>Missing Group</b>             | 0.32               | -0.16, 0.80  | 1.30  | 0.87              | -0.11, 1.84 | 1.75  |
| 33 |                                  |                    |              |       |                   |             |       |
| 34 |                                  |                    |              |       |                   |             |       |
| 35 | <b>Baseline CES-D Score</b>      | -0.01 <sup>b</sup> | -0.01, 0.00  | -1.59 | -0.01             | -0.03, 0.00 | -2.57 |
| 36 |                                  |                    |              |       |                   |             |       |
| 37 | <b>year = 2</b>                  | -0.24              | -0.33, -0.15 | -5.21 | -0.17             | -0.37, 0.03 | -1.70 |
| 38 |                                  |                    |              |       |                   |             |       |
| 39 |                                  |                    |              |       |                   |             |       |
| 40 |                                  |                    |              |       |                   |             |       |
| 41 |                                  |                    |              |       |                   |             |       |
| 42 |                                  |                    |              |       |                   |             |       |
| 43 |                                  |                    |              |       |                   |             |       |
| 44 |                                  |                    |              |       |                   |             |       |
| 45 |                                  |                    |              |       |                   |             |       |
| 46 |                                  |                    |              |       |                   |             |       |

| Constant | 0.63 | 0.53, 0.74 | 11.54 | 6.48 <sup>a</sup> | 5.59, 7.37 | 14.28 |
|----------|------|------------|-------|-------------------|------------|-------|
|----------|------|------------|-------|-------------------|------------|-------|

Abbreviations: CI, confidence interval; SHS, secondhand smoke.

a.  $p < 0.01$

b.  $p < 0.05$

c.  $p < 0.1$

d. Referent: No SHS exposure or Less than 25 years.

e. Expenditure is expressed as the natural log of the annual household expenditure

f. Referent: Illiterate

g. Referent: Without hypertension

h. Referent: Without diabetes



# Reporting checklist for qualitative study.

Based on the SRQR guidelines.

## Instructions to authors

Complete this checklist by entering the page numbers from your manuscript where readers will find each of the items listed below.

Your article may not currently address all the items on the checklist. Please modify your text to include the missing information. If you are certain that an item does not apply, please write "n/a" and provide a short explanation.

Upload your completed checklist as an extra file when you submit to a journal.

In your methods section, say that you used the SRQR reporting guidelines, and cite them as:

O'Brien BC, Harris IB, Beckman TJ, Reed DA, Cook DA. Standards for reporting qualitative research: a synthesis of recommendations. *Acad Med.* 2014;89(9):1245-1251.

|                              | Reporting Item                                                                                                                                                                                                                                          | Page Number |
|------------------------------|---------------------------------------------------------------------------------------------------------------------------------------------------------------------------------------------------------------------------------------------------------|-------------|
| <b>Title</b>                 |                                                                                                                                                                                                                                                         |             |
|                              | <a href="#">#1</a> Concise description of the nature and topic of the study identifying the study as qualitative or indicating the approach (e.g. ethnography, grounded theory) or data collection methods (e.g. interview, focus group) is recommended | 1           |
| <b>Abstract</b>              |                                                                                                                                                                                                                                                         |             |
|                              | <a href="#">#2</a> Summary of the key elements of the study using the abstract format of the intended publication; typically includes background, purpose, methods, results and conclusions                                                             | 2           |
| <b>Introduction</b>          |                                                                                                                                                                                                                                                         |             |
| Problem formulation          | <a href="#">#3</a> Description and significance of the problem / phenomenon studied: review of relevant theory and empirical work; problem statement                                                                                                    | 4           |
| Purpose or research question | <a href="#">#4</a> Purpose of the study and specific objectives or questions                                                                                                                                                                            | 5           |

## 1 **Methods**

|    |                              |                     |                                                                 |
|----|------------------------------|---------------------|-----------------------------------------------------------------|
| 2  |                              |                     |                                                                 |
| 3  | Qualitative approach and     | <a href="#">#5</a>  | Qualitative approach (e.g. ethnography, grounded theory, case   |
| 4  | research paradigm            |                     | study, phenomenology, narrative research) and guiding theory    |
| 5  |                              |                     | if appropriate; identifying the research paradigm (e.g.         |
| 6  |                              |                     | postpositivist, constructivist / interpretivist) is also        |
| 7  |                              |                     | recommended; rationale. The rationale should briefly discuss    |
| 8  |                              |                     | the justification for choosing that theory, approach, method or |
| 9  |                              |                     | technique rather than other options available; the assumptions  |
| 10 |                              |                     | and limitations implicit in those choices and how those         |
| 11 |                              |                     | choices influence study conclusions and transferability. As     |
| 12 |                              |                     | appropriate the rationale for several items might be discussed  |
| 13 |                              |                     | together.                                                       |
| 14 |                              |                     |                                                                 |
| 15 |                              |                     |                                                                 |
| 16 |                              |                     |                                                                 |
| 17 |                              |                     |                                                                 |
| 18 |                              |                     |                                                                 |
| 19 |                              |                     |                                                                 |
| 20 | Researcher characteristics   | <a href="#">#6</a>  | Researchers' characteristics that may influence the research,   |
| 21 | and reflexivity              |                     | including personal attributes, qualifications / experience,     |
| 22 |                              |                     | relationship with participants, assumptions and / or            |
| 23 |                              |                     | presuppositions; potential or actual interaction between        |
| 24 |                              |                     | researchers' characteristics and the research questions,        |
| 25 |                              |                     | approach, methods, results and / or transferability             |
| 26 |                              |                     |                                                                 |
| 27 |                              |                     |                                                                 |
| 28 |                              |                     |                                                                 |
| 29 |                              |                     |                                                                 |
| 30 | Context                      | <a href="#">#7</a>  | Setting / site and salient contextual factors; rationale        |
| 31 |                              |                     |                                                                 |
| 32 |                              |                     |                                                                 |
| 33 | Sampling strategy            | <a href="#">#8</a>  | How and why research participants, documents, or events         |
| 34 |                              |                     | were selected; criteria for deciding when no further sampling   |
| 35 |                              |                     | was necessary (e.g. sampling saturation); rationale             |
| 36 |                              |                     |                                                                 |
| 37 |                              |                     |                                                                 |
| 38 | Ethical issues pertaining to | <a href="#">#9</a>  | Documentation of approval by an appropriate ethics review       |
| 39 | human subjects               |                     | board and participant consent, or explanation for lack thereof; |
| 40 |                              |                     | other confidentiality and data security issues                  |
| 41 |                              |                     |                                                                 |
| 42 |                              |                     |                                                                 |
| 43 | Data collection methods      | <a href="#">#10</a> | Types of data collected; details of data collection procedures  |
| 44 |                              |                     | including (as appropriate) start and stop dates of data         |
| 45 |                              |                     | collection and analysis, iterative process, triangulation of    |
| 46 |                              |                     | sources / methods, and modification of procedures in response   |
| 47 |                              |                     | to evolving study findings; rationale                           |
| 48 |                              |                     |                                                                 |
| 49 |                              |                     |                                                                 |
| 50 |                              |                     |                                                                 |
| 51 | Data collection instruments  | <a href="#">#11</a> | Description of instruments (e.g. interview guides,              |
| 52 | and technologies             |                     | questionnaires) and devices (e.g. audio recorders) used for     |
| 53 |                              |                     | data collection; if / how the instruments(s) changed over the   |
| 54 |                              |                     | course of the study                                             |
| 55 |                              |                     |                                                                 |
| 56 |                              |                     |                                                                 |
| 57 |                              |                     |                                                                 |
| 58 |                              |                     |                                                                 |
| 59 |                              |                     |                                                                 |
| 60 |                              |                     |                                                                 |

|    |                                                                                              |                     |                                                                                                                                                                                                                                                                                                          |    |
|----|----------------------------------------------------------------------------------------------|---------------------|----------------------------------------------------------------------------------------------------------------------------------------------------------------------------------------------------------------------------------------------------------------------------------------------------------|----|
| 1  | Units of study                                                                               | <a href="#">#12</a> | Number and relevant characteristics of participants, documents, or events included in the study; level of participation (could be reported in results)                                                                                                                                                   | 7  |
| 2  |                                                                                              |                     |                                                                                                                                                                                                                                                                                                          |    |
| 3  |                                                                                              |                     |                                                                                                                                                                                                                                                                                                          |    |
| 4  |                                                                                              |                     |                                                                                                                                                                                                                                                                                                          |    |
| 5  |                                                                                              |                     |                                                                                                                                                                                                                                                                                                          |    |
| 6  | Data processing                                                                              | <a href="#">#13</a> | Methods for processing data prior to and during analysis, including transcription, data entry, data management and security, verification of data integrity, data coding, and anonymisation / deidentification of excerpts                                                                               | 10 |
| 7  |                                                                                              |                     |                                                                                                                                                                                                                                                                                                          |    |
| 8  |                                                                                              |                     |                                                                                                                                                                                                                                                                                                          |    |
| 9  |                                                                                              |                     |                                                                                                                                                                                                                                                                                                          |    |
| 10 |                                                                                              |                     |                                                                                                                                                                                                                                                                                                          |    |
| 11 |                                                                                              |                     |                                                                                                                                                                                                                                                                                                          |    |
| 12 |                                                                                              |                     |                                                                                                                                                                                                                                                                                                          |    |
| 13 | Data analysis                                                                                | <a href="#">#14</a> | Process by which inferences, themes, etc. were identified and developed, including the researchers involved in data analysis; usually references a specific paradigm or approach; rationale                                                                                                              | 11 |
| 14 |                                                                                              |                     |                                                                                                                                                                                                                                                                                                          |    |
| 15 |                                                                                              |                     |                                                                                                                                                                                                                                                                                                          |    |
| 16 |                                                                                              |                     |                                                                                                                                                                                                                                                                                                          |    |
| 17 |                                                                                              |                     |                                                                                                                                                                                                                                                                                                          |    |
| 18 | Techniques to enhance trustworthiness                                                        | <a href="#">#15</a> | Techniques to enhance trustworthiness and credibility of data analysis (e.g. member checking, audit trail, triangulation); rationale                                                                                                                                                                     | 10 |
| 19 |                                                                                              |                     |                                                                                                                                                                                                                                                                                                          |    |
| 20 |                                                                                              |                     |                                                                                                                                                                                                                                                                                                          |    |
| 21 |                                                                                              |                     |                                                                                                                                                                                                                                                                                                          |    |
| 22 |                                                                                              |                     |                                                                                                                                                                                                                                                                                                          |    |
| 23 |                                                                                              |                     |                                                                                                                                                                                                                                                                                                          |    |
| 24 | <b>Results/findings</b>                                                                      |                     |                                                                                                                                                                                                                                                                                                          |    |
| 25 |                                                                                              |                     |                                                                                                                                                                                                                                                                                                          |    |
| 26 | Syntheses and interpretation                                                                 | <a href="#">#16</a> | Main findings (e.g. interpretations, inferences, and themes); might include development of a theory or model, or integration with prior research or theory                                                                                                                                               | 11 |
| 27 |                                                                                              |                     |                                                                                                                                                                                                                                                                                                          |    |
| 28 |                                                                                              |                     |                                                                                                                                                                                                                                                                                                          |    |
| 29 |                                                                                              |                     |                                                                                                                                                                                                                                                                                                          |    |
| 30 |                                                                                              |                     |                                                                                                                                                                                                                                                                                                          |    |
| 31 | Links to empirical data                                                                      | <a href="#">#17</a> | Evidence (e.g. quotes, field notes, text excerpts, photographs) to substantiate analytic findings                                                                                                                                                                                                        | 11 |
| 32 |                                                                                              |                     |                                                                                                                                                                                                                                                                                                          |    |
| 33 |                                                                                              |                     |                                                                                                                                                                                                                                                                                                          |    |
| 34 |                                                                                              |                     |                                                                                                                                                                                                                                                                                                          |    |
| 35 | <b>Discussion</b>                                                                            |                     |                                                                                                                                                                                                                                                                                                          |    |
| 36 |                                                                                              |                     |                                                                                                                                                                                                                                                                                                          |    |
| 37 |                                                                                              |                     |                                                                                                                                                                                                                                                                                                          |    |
| 38 | Intergration with prior work, implications, transferability and contribution(s) to the field | <a href="#">#18</a> | Short summary of main findings; explanation of how findings and conclusions connect to, support, elaborate on, or challenge conclusions of earlier scholarship; discussion of scope of application / generalizability; identification of unique contributions(s) to scholarship in a discipline or field | 13 |
| 39 |                                                                                              |                     |                                                                                                                                                                                                                                                                                                          |    |
| 40 |                                                                                              |                     |                                                                                                                                                                                                                                                                                                          |    |
| 41 |                                                                                              |                     |                                                                                                                                                                                                                                                                                                          |    |
| 42 |                                                                                              |                     |                                                                                                                                                                                                                                                                                                          |    |
| 43 |                                                                                              |                     |                                                                                                                                                                                                                                                                                                          |    |
| 44 |                                                                                              |                     |                                                                                                                                                                                                                                                                                                          |    |
| 45 |                                                                                              |                     |                                                                                                                                                                                                                                                                                                          |    |
| 46 | Limitations                                                                                  | <a href="#">#19</a> | Trustworthiness and limitations of findings                                                                                                                                                                                                                                                              | 15 |
| 47 |                                                                                              |                     |                                                                                                                                                                                                                                                                                                          |    |
| 48 | <b>Other</b>                                                                                 |                     |                                                                                                                                                                                                                                                                                                          |    |
| 49 |                                                                                              |                     |                                                                                                                                                                                                                                                                                                          |    |
| 50 |                                                                                              |                     |                                                                                                                                                                                                                                                                                                          |    |
| 51 | Conflicts of interest                                                                        | <a href="#">#20</a> | Potential sources of influence of perceived influence on study conduct and conclusions; how these were managed                                                                                                                                                                                           | 17 |
| 52 |                                                                                              |                     |                                                                                                                                                                                                                                                                                                          |    |
| 53 |                                                                                              |                     |                                                                                                                                                                                                                                                                                                          |    |
| 54 | Funding                                                                                      | <a href="#">#21</a> | Sources of funding and other support; role of funders in data collection, interpretation and reporting                                                                                                                                                                                                   | 17 |
| 55 |                                                                                              |                     |                                                                                                                                                                                                                                                                                                          |    |
| 56 |                                                                                              |                     |                                                                                                                                                                                                                                                                                                          |    |
| 57 |                                                                                              |                     |                                                                                                                                                                                                                                                                                                          |    |
| 58 |                                                                                              |                     |                                                                                                                                                                                                                                                                                                          |    |
| 59 |                                                                                              |                     |                                                                                                                                                                                                                                                                                                          |    |
| 60 |                                                                                              |                     |                                                                                                                                                                                                                                                                                                          |    |

1 The SRQR checklist is distributed with permission of Wolters Kluwer © 2014 by the Association of American  
2 Medical Colleges. This checklist was completed on 27. April 2020 using <https://www.goodreports.org/>, a tool  
3 made by the [EQUATOR Network](#) in collaboration with [Penelope.ai](#)  
4  
5  
6  
7  
8  
9  
10  
11  
12  
13  
14  
15  
16  
17  
18  
19  
20  
21  
22  
23  
24  
25  
26  
27  
28  
29  
30  
31  
32  
33  
34  
35  
36  
37  
38  
39  
40  
41  
42  
43  
44  
45  
46  
47  
48  
49  
50  
51  
52  
53  
54  
55  
56  
57  
58  
59  
60

For peer review only

# BMJ Open

## Exposure to Secondhand Smoke and Cognitive Function Among Middle-aged and Older Women in China: Findings of 3-waves of the China Health and Retirement Longitudinal Study

|                                 |                                                                                                                                                                                                                              |
|---------------------------------|------------------------------------------------------------------------------------------------------------------------------------------------------------------------------------------------------------------------------|
| Journal:                        | <i>BMJ Open</i>                                                                                                                                                                                                              |
| Manuscript ID                   | bmjopen-2020-039824.R1                                                                                                                                                                                                       |
| Article Type:                   | Original research                                                                                                                                                                                                            |
| Date Submitted by the Author:   | 22-Aug-2020                                                                                                                                                                                                                  |
| Complete List of Authors:       | Bai, Anying; Peking University Health Science Centre, School of Public Health;<br>Jin, Yinzi; Peking University, School of Public Health<br>Huang, Yangmu; Peking University Health Science Centre, School of Public Health; |
| <b>Primary Subject Heading</b>: | Epidemiology                                                                                                                                                                                                                 |
| Secondary Subject Heading:      | Smoking and tobacco, Public health, Mental health                                                                                                                                                                            |
| Keywords:                       | EPIDEMIOLOGY, Dementia < NEUROLOGY, PUBLIC HEALTH                                                                                                                                                                            |
|                                 |                                                                                                                                                                                                                              |

SCHOLARONE™  
Manuscripts



I, the Submitting Author has the right to grant and does grant on behalf of all authors of the Work (as defined in the below author licence), an exclusive licence and/or a non-exclusive licence for contributions from authors who are: i) UK Crown employees; ii) where BMJ has agreed a CC-BY licence shall apply, and/or iii) in accordance with the terms applicable for US Federal Government officers or employees acting as part of their official duties; on a worldwide, perpetual, irrevocable, royalty-free basis to BMJ Publishing Group Ltd ("BMJ") its licensees and where the relevant Journal is co-owned by BMJ to the co-owners of the Journal, to publish the Work in this journal and any other BMJ products and to exploit all rights, as set out in our [licence](#).

The Submitting Author accepts and understands that any supply made under these terms is made by BMJ to the Submitting Author unless you are acting as an employee on behalf of your employer or a postgraduate student of an affiliated institution which is paying any applicable article publishing charge ("APC") for Open Access articles. Where the Submitting Author wishes to make the Work available on an Open Access basis (and intends to pay the relevant APC), the terms of reuse of such Open Access shall be governed by a Creative Commons licence – details of these licences and which [Creative Commons](#) licence will apply to this Work are set out in our licence referred to above.

Other than as permitted in any relevant BMJ Author's Self Archiving Policies, I confirm this Work has not been accepted for publication elsewhere, is not being considered for publication elsewhere and does not duplicate material already published. I confirm all authors consent to publication of this Work and authorise the granting of this licence.

---

**Title**

Exposure to Secondhand Smoke and Cognitive Function Among  
Middle-aged and Older Women in China: Findings of 3-waves  
of the China Health and Retirement Longitudinal Study

Anying, Bai <sup>1</sup>, Yinzi Jin Ph.D.<sup>1</sup>, Yangmu Huang Ph.D.<sup>1</sup>

<sup>1</sup> School of Public Health, Peking University Health and  
Science Centre

Corresponding Author:

Yangmu Huang, Ph.D.

Peking University Health and Science Centre, School of  
Public Health

Xueyuan Road No.38, Haidian Distreet, BeiJing, China

Tel: 15010376131

Fax: 010-62755782

Email: ymhuang@bjmu.edu.cn

---

## Abstract

**Objectives:** To examine the association between secondhand smoke and women's global cognitive function and cognitive subdomains.

**Design:** Cohort study

**Participants:** Data for this study were obtained from the China Health and Retirement Longitudinal Study (CHARLS, 2011-2013-2015), and pooled analysis was applied to wave 1 and wave 2 (2011-2013), wave 2 and wave 3 (2013-2015) and wave 1 and wave 3 (2011-2015). Data from a total of 6875 Chinese women with normal cognitive function in baseline were selected for analysis, including 2981 who were interviewed in 2011, 2471 in 2013, and 1894 in 2015.

**Main outcome measures and methods:** Secondhand smoke was classified based on length of exposed years (<25years, ≥ 25 to <30 years, ≥30 to <40 years, ≥40 years). Global cognitive function, visuospatial ability, orientation and attention, and episodic memory function were used as measures of cognitive function. We pooled the three waves of data by using dummy variable to differentiate between



1  
2  
3  
4 2-year and 4-year. Lagged dependent variable models were  
5  
6 used to examine independent associations between  
7  
8 secondhand smoke and cognitive function. Demographic  
9  
10 factors, socioeconomic factors, baseline cognitive  
11  
12 functioning and health conditions were controlled in our  
13  
14 models.  
15  
16  
17

18  
19 **Results:** Secondhand smoke was found to be inversely and  
20  
21 significantly associated with cognitive function.  
22  
23 Compared with those had not been exposed to household  
24  
25 secondhand smoke, women who had lived with a smoking  
26  
27 husband had significantly faster cognition decline,  
28  
29 especially in global cognitive function ( $\beta=-0.33$ , 95%CI, -0.66--  
30  
31 0.01,  $P<0.01$ ), visuospatial ability ( $\beta=-0.04$ , 95%CI, -0.08--0.01  $P$   
32  
33  $< 0.05$ ) and episodic memory function ( $\beta=-0.16$ , 95%CI, -0.31--  
34  
35 -0.01  $P = 0.031$ ).  
36  
37  
38  
39  
40  
41  
42

43 **Conclusions:** Secondhand smoke within household is a risk  
44  
45 factor for cognitive decline among Chinese non-smoking  
46  
47 women. Being exposed to secondhand smoke for more than 40  
48  
49 years was associated with greater decline in global  
50  
51 cognitive function, visuospatial ability and episodic  
52  
53 memory function, but not in orientation and attention  
54  
55 function among elder Chinese women.  
56  
57  
58  
59  
60

---

**Key words:** aging; passive smoking; panel analysis; visuospatial ability; memory

**Strengths and limitations of this study:**

- This is the first study to investigate on the association between secondhand smoke exposure and women's different domains of cognitive functions in China using a 4-year longitudinal national representative data.
- This study addressed the issue of reverse causation in observational cohort studies by used lagged dependent variable models and adjust for baseline cognition scores
- The exposure to secondhand smoke was evaluated based on self-report measures.
- The analyses only contained household SHS exposure and excluding environmental exposure.

**Word Count: 3214**

**Number of references:31**

**Number of data elements :1**

**Introduction**

China's population has been ageing rapidly. By 2050, there will be 400 million Chinese citizens aged over 65 years old, and 150 million of whom will be older than 80

1  
2  
3  
4 years old<sup>[1]</sup>. It will become increasingly important to  
5  
6 understand the cognitive changes that accompany aging<sup>[2]</sup>.  
7  
8 Cognitive impairment, described as a decline in  
9  
10 intellectual functions <sup>[3]</sup>, ranges from mild forms of  
11  
12 forgetfulness to severe and debilitating dementia <sup>[4]</sup>. The  
13  
14 prevalence of cognitive impairment is rising, with national  
15  
16 figures estimating that around 9% of older persons in China  
17  
18 had cognitive impairment in 2011 <sup>[4]</sup>.  
19  
20  
21  
22  
23  
24

25 Numerous determinants such as environmental, individual,  
26  
27 and genetic factors could favor evolution toward cognitive  
28  
29 impairment, and both age and late-life hypertension  
30  
31 increase the risk of dementia over time <sup>[5]</sup>. The mechanism  
32  
33 lies in age-related functional and structural changes in  
34  
35 cerebrovascular small and large blood vessels <sup>[6]</sup>. Besides  
36  
37 chronic diseases factors, depression has long been known  
38  
39 to affect memory and other neurocognitive domains, and be  
40  
41 associated with an increased risk of developing mild  
42  
43 cognitive impairment (MCI) in cognitively normal elderly  
44  
45 people <sup>[7]</sup>.  
46  
47  
48  
49  
50  
51

52  
53 Exposure to secondhand smoke (SHS), also known as  
54  
55 "passive smoking," refers to a situation where a never-  
56  
57 smoker inhales another person's smoke either by exposure  
58  
59  
60

1  
2  
3  
4 to side stream smoke or mainstream smoke <sup>[8]</sup>. Current smoking  
5  
6 prevalence in China decreased from 31.1% in 2002 to 28.1%  
7  
8 in 2010; however, the number of adults exposed to  
9  
10 secondhand smoke during this period still increased from  
11  
12 540 million to 556 million <sup>[2]</sup>. The negative health effects  
13  
14 of high levels of exposure to SHS may be close to those of  
15  
16 active smoking, including inferior performance on measures  
17  
18 of general intelligence, visuospatial learning and memory  
19  
20 and fine motor dexterity <sup>[9]</sup>. Given the association between  
21  
22 exposure to SHS and risk factors for cognitive impairment  
23  
24 such as cardiovascular disease <sup>[10]</sup>, hypertension <sup>[11]</sup>, and  
25  
26 stroke <sup>[12]</sup>, it is possible that high level of exposure may  
27  
28 be a preventable risk factor for cognitive impairment or  
29  
30 dementia <sup>[13]</sup>.

31  
32  
33  
34  
35  
36  
37  
38  
39  
40 Several studies have shown that exposure of SHS and  
41  
42 cognitive impairment are interrelated <sup>[13-15]</sup>. However, much  
43  
44 less is known about whether and to what extent SHS is  
45  
46 associated with global and subdomains of cognitive function  
47  
48 among elder women in China. Previous studies of active  
49  
50 smoking and cognitive impairment among the Chinese  
51  
52 population suggested that older current smokers (aged 63  
53  
54 years old on average) <sup>[14]</sup> or those being exposed to SHS  
55  
56  
57  
58  
59  
60

(aged between 55-64 years old) <sup>[16]</sup> were more likely to develop cognitive impairment compared with never-smokers. Nevertheless, both of them used only a 2-wave longitudinal data and did not control for baseline cognition. Therefore, the primary aim of this study was to investigate the relationship between secondhand smoke and cognitive function among older non-smoking Chinese women, using a 3-wave longitudinal national representative data. Through the classification of respondents by different years of secondhand smoke exposure in a 4-year panel, we identified whether certain high SHS exposure groups were at higher risk of cognitive decline than others after controlling for confounders. Besides, we aimed to examine the association between secondhand smoke exposure and cognitive subdomains. This is especially important given the escalating aging trend and increasing prevalence of SHS exposure in China.

## Methods

### Data

CHARLS had passed the ethical review before field investigation and we used data from 3 waves of the China Health and Retirement Longitudinal Study (CHARLS,2011-2013-2015), which was publicly available at <http://charls.pku.edu.cn>. CHARLS involved participants with a nationally

---

1  
2  
3  
4 representative survey of adults aged 45 years or older, as  
5  
6 well as their spouses when possible, and included  
7  
8 assessments of social, economic, and health circumstances  
9  
10 of community-residents. The national baseline survey was  
11  
12 conducted between June 2011 and March 2012 and samples were  
13  
14 chosen through multistage probability sampling. After  
15  
16 excluding empty or non-resident dwellings, final interviews  
17  
18 were conducted on 17,708 respondents from 10,257 households,  
19  
20 which completed at least one module of the survey beyond  
21  
22 the cover screening for age eligibility. CHARLS respondents  
23  
24 were followed every 2 years, using a face-to-face computer-  
25  
26 assisted personal interview (CAPI) <sup>[17]</sup>. At baseline there  
27  
28 was 3381 married women who never smoked cigarettes and  
29  
30 lived with spouses who had either smoked cigarettes in the  
31  
32 past or smoked at the time of interview. Besides, all the  
33  
34 data for each variable have been collected for those  
35  
36 respondents. Our final sample was composed of 6875  
37  
38 respondents, among them 2802 were interviewed again during  
39  
40 the second wave of data collection in 2013, and 2247 were  
41  
42 interviewed again during the third wave in 2015. The  
43  
44 similar sample selection process was conducted for  
45  
46 participants in the second wave in 2013 as baseline, and  
47  
48  
49  
50  
51  
52  
53  
54  
55  
56  
57  
58  
59  
60

1  
2  
3  
4 final sample was consisted of 1799 women who were  
5  
6 investigated again in 2015 as participants.  
7  
8  
9

## 10 **Measures**

### 11 ***Secondhand Smoke***

12  
13  
14  
15 Based on standardized CHARLS questionnaire, the exposure  
16  
17 to SHS among Chinese women was assessed through several  
18  
19 surveys, asking the participants about their current  
20  
21 marital status, the exact year they got married, and the  
22  
23 year the husband in each household has begun or ceased  
24  
25 smoking at home.  
26  
27  
28  
29

30  
31 The smoking status section contained four questions:  
32  
33 "Have you ever chewed tobacco, smoked a pipe, smoked self-  
34  
35 rolled cigarettes, or smoked cigarettes/cigars?", "Do you  
36  
37 still have the habit or have you totally quit?", "At what  
38  
39 age did you totally quit smoking?" and "At what age did you  
40  
41 start to smoke on a regular basis?". If the answer to the  
42  
43 first question was "yes", they were defined as "current  
44  
45 smokers". Our analysis of SHS exposure focused only on  
46  
47 never smokers excluding the "current smokers", because of  
48  
49 the difficulty to differentiate the negative effects of  
50  
51 active smoking on health condition from that of SHS  
52  
53 exposure. The length of SHS exposure was calculated and  
54  
55  
56  
57  
58  
59  
60

---

expressed as the total number of years that never-smoking women spent living with their spouses who smoked cigarettes at home. Based on the constructed SHS exposure variable, the participants were classified into four different groups: Never or being exposed to secondhand smoke for less than 25 years, more than 25 years and less than 30 years, more than 30 years and less than 40 years and over 40 years.

### ***Cognitive function***

The cognitive function of the respondents in CHARLS questionnaires was measured through a question-and-answer interview instrument, and the respondents would be followed every two years using a face-to-face, computer-aided personal interview (CAPI). Cognitive subdomains including visuospatial ability, orientation and attention, and episodic memory could be assessed by these various sections of questionnaire. Figure drawing was tested by asking the participants to reproduce a picture of two overlapped pentagons in CHARLS questionnaires<sup>[17]</sup>, and was used to measure a person's ability to identify visual and spatial relationships among objects. The Telephone Interview of Cognitive Status (TICS) was a screening test including serial subtractions of 7 from 100 (up to 5 times), date (month, day, and year and season), and the day of the week. To assess orientation and attention function, the number of correct answers to above questions in TICS was scored and



1  
2  
3  
4 summed up (range 0 to 10). Participants who successfully completed the task received  
5  
6 a score of 1, and those who failed received 0<sup>[18]</sup>.  
7  
8

9 In addition, the word recall test was consisted of 2  
10 components, immediate recall and delayed recall, and  
11 evaluated episodic memory. Participants were required to  
12 immediately repeat 10 Chinese nouns just read to them, and  
13 after 20 questions concerning Center for Epidemiologic  
14 Studies Depression Scale (CES-D, approximately 4 to 10  
15 minutes), they were again asked to recall as many of the  
16 original words as possible. The item was coded as 1 if  
17 recalled by the respondent, and as 0 if not. Scores for  
18 immediate and delayed recall both varied from 0 to 10. An  
19 evaluated episodic memory score was calculated using the  
20 mean of scores in immediate and delayed word recall (range  
21 0 to 10)<sup>[19]</sup>.  
22  
23  
24  
25  
26  
27  
28  
29  
30  
31  
32  
33  
34  
35  
36  
37  
38  
39  
40  
41  
42

43 The overall cognition scores were the sum of the three  
44 different domains (range 0 to 21).  
45  
46  
47

#### 48 ***Control variables***

49

50 Given that cognitive function may vary across  
51 demographic and socioeconomic status, we thus included age,  
52 urban/rural residence, education, annual household  
53 expenditures, chronic diseases and depressive symptoms as  
54  
55  
56  
57  
58  
59  
60

control variables. Education was categorized into 3 groups: "illiterate", "primary education" and "secondary education or above". Arterial hypertension and diabetes mellitus are separately strong independent risk factors for the development of cognitive impairment and dementia<sup>[6]</sup> [20]. Thus, the baseline chronic disease of hypertension and diabetes were classified as three types based on self-reported conditions on whether the participants were being treated: having hypertension/diabetes with treatment, having hypertension/diabetes without treatment and not having hypertension/diabetes. The measure of depressive symptoms was based on the 10-item version of the Center for Epidemiologic Studies Depression Scale (CES-D) short form, and each of the 4-option response to item was scored ranging from 0 to 3. The total score is the sum of points for all 10 items, and a score of 10 or higher suggests the presence of depressive symptoms .

#### ***Patient and Public Involvement***

No patient involved.

#### ***Analysis***

All analyses were conducted with STATA, version 14.0 (Stata, College Station, TX, USA). We used lagged dependent-

1  
2  
3  
4 variable regression models with ordinary least squares  
5  
6 estimation. LDV models were superior for analyzing the  
7  
8 effects of predictor variables on an outcome with 2-wave  
9  
10 panel data while controlling for the influence of time-  
11  
12 invariant variables <sup>[16]</sup>. It adjusted for baseline cognitive  
13  
14 conditions for all participants, therefore provided more  
15  
16 robust estimates of the effects of independent variables.  
17  
18 After pooling the three sets of panel data into one through  
19  
20 using the "year" dummy variable to differentiate between  
21  
22 change in 2 years or in 4 years, we have 6875 respondents  
23  
24 who have complete data on all variables. The overall  
25  
26 cognitive scores, episodic memory scores, visuospatial  
27  
28 ability scores and orientation and attention scores were 4  
29  
30 separate outcome variables. The different groups of SHS  
31  
32 exposure years were the predictor variable, and other  
33  
34 independent variables included all demographic and  
35  
36 socioeconomic characteristics. Prior to fitting the  
37  
38 regression models, descriptive analyses were conducted to  
39  
40 estimate the mean and standard deviations for continuous  
41  
42 data and frequencies and percentages for categorical data.  
43  
44  
45  
46  
47  
48  
49  
50  
51  
52  
53  
54  
55  
56

## 57 **Results**

58  
59 Table 1 provides a descriptive summary of all the  
60

1  
2  
3  
4 variables for participants from each panel of three  
5  
6 different waves: 2011-2013, 2011-2015 and 2013-2015. High  
7  
8 prevalence of SHS exposure between 30 to 40 years were seen  
9  
10 in different panels, accounting for 32.51%, 35.18% and  
11  
12 42.69% respectively.  
13  
14

15  
16 The participants were over 45 years old, with the  
17  
18 average age of 56, 56 and 58 years old, respectively in  
19  
20 those waves. Participants were more likely to live in rural  
21  
22 area, have lower education background and do not have  
23  
24 hypertension or diabetes diagnose at baseline. In addition,  
25  
26 our results indicated that the average baseline cognition  
27  
28 scores were higher than cognition scores after 2 or 4 years.  
29  
30 The average scores of Center for Epidemiologic Studies  
31  
32 Depression Scale (CES-D) indicated that the prevalence of  
33  
34 depression among Chinese middle-aged and old-aged women  
35  
36 were high in those years. Other socio-demographic  
37  
38 characteristics of the respondents are shown in Table 1  
39  
40  
41  
42  
43  
44  
45  
46  
47

48 Results from the regression models for the  
49  
50 relationship between SHS exposure and each domain of  
51  
52 cognitive function and overall cognition scores are  
53  
54 reported in Table 2 and Table 3. Scores of episodic  
55  
56 memory, orientation and attention and visuospatial among  
57  
58  
59  
60

1  
2  
3  
4 respondents at baseline were strong predictors of their  
5  
6 corresponding cognitive function measures after 2 or 4  
7  
8 years. Based on the analysis adjusted for age, annual  
9  
10 household expenditure, education, baseline cognitive  
11  
12 function and other chronic health status, we found that  
13  
14 only being exposed to SHS for more than 40 years  
15  
16 significantly resulted in a decline in visuospatial  
17  
18 abilities, episodic memory and overall cognition scores  
19  
20 for all respondents. Compared with respondents who were  
21  
22 not exposed to SHS or exposed to it for less than 25  
23  
24 years, those who have been exposed to SHS for more than  
25  
26 40 years was associated with 0.04-point decline in  
27  
28 visuospatial abilities (95%CI, -0.08--0.01 P <0.1), 0.16-  
29  
30 point decline in episodic memory (95%CI, -0.31--0.01 P  
31  
32 <0.05), and 0.33-point decline in overall cognition  
33  
34 function (95%CI, -0.66--0.01 P <0.01). In addition, age was  
35  
36 also negatively associated with cognitive function. Each  
37  
38 one-year older resulted in 0.01-point, 0.01-point, 0.03-  
39  
40 point, and 0.05-point decrease in visuospatial (95%CI, -  
41  
42 0.01--0.00 P <0.01), orientation (95%CI, -0.03---0.01 P <0.01),  
43  
44 memory (95%CI, -0.31---0.01 P <0.05) and overall cognition  
45  
46 scores (95%CI, -0.66---0.01 P <0.01), respectively. High  
47  
48  
49  
50  
51  
52  
53  
54  
55  
56  
57  
58  
59  
60

---

1  
2  
3  
4 education level was associated with better cognitive  
5  
6 performance, especially in orientation and attention.  
7  
8  
9 What's more, one-point increase in CESD scores was  
10  
11 associated with 0.02-point decrease in scores of  
12  
13 orientation and attention (95%CI, -0.03--0.00 P <0.05),  
14  
15 showing that respondents with depressive symptoms were  
16  
17 more likely to demonstrate cognitive decline in specific  
18  
19 functions.  
20  
21  
22  
23  
24

## 25 **Discussion**

26  
27 Results from this longitudinal study with a large,  
28  
29 representative sample of middle-aged and older women in  
30  
31 China indicated that exposure to secondhand smoke for over  
32  
33 40 years was significantly associated with poorer  
34  
35 performance of global cognition and cognitive subdomains.  
36  
37 It is the first examination of cognitive subdomains in  
38  
39 relation to household SHS exposure using a 4-year  
40  
41 longitudinal data in China. The inferior performance of  
42  
43 secondhand smoke on visuospatial abilities, episodic memory  
44  
45 and orientation and attention abilities are novel as these  
46  
47 domains were not specifically evaluated in earlier studies  
48  
49 among middle-aged and older women who never smoke  
50  
51  
52  
53  
54  
55  
56  
57  
58 [9]. Previous study only suggested that secondhand smoke was  
59  
60

1  
2  
3  
4 associated with poorer cognitive performance, specifically  
5  
6 in children, adolescents and adults <sup>[14]</sup>. Besides, we found  
7  
8 that having a high educational level, living in urban area  
9  
10 and having better baseline cognitive function would improve  
11  
12 their cognitive performance. Compared with those without  
13  
14 diabetes, participants with diabetes in baseline were found  
15  
16 to have a 0.172-point decline in episodic memory scores,  
17  
18 which is similar to the previous findings <sup>[20]</sup>.  
19  
20  
21  
22  
23  
24

25 Our results showed that compared with women who have  
26  
27 never been exposed to SHS or have been exposed for less  
28  
29 than 20 years, those who have been exposed to SHS for more  
30  
31 than 40 years experienced 0.04-point, 0.16-point and 0.33-  
32  
33 point of decline in scores of visuospatial function,  
34  
35 episodic memory and overall cognitive scores, respectively.  
36  
37  
38 Our results were quite similar in magnitude to prior  
39  
40 research on the relationship between SHS and cognitive  
41  
42 function <sup>[16]</sup>. A cross-sectional research including 150  
43  
44 samples conducted in the North East of England revealed  
45  
46 that participants who had no history of smoking and being  
47  
48 averagely exposed to SHS for around 6 years showed  
49  
50 significantly reduced performance in processing speed (i.e.  
51  
52 how quickly one can process information and perform tasks)  
53  
54  
55  
56  
57  
58  
59  
60

1  
2  
3  
4 and executive function (i.e. the ability to organize memory,  
5  
6 cognitive flexibility, and problem-solving ability) as  
7  
8  
9 compared with non-exposed people<sup>[13]</sup>. Another longitudinal  
10  
11 aging study concerning 4809 samples (aged 50 years or older)  
12  
13  
14 found that never smokers exposed to the highest levels of  
15  
16 SHS (salivary cotinine concentrations 0.8-13.5 ng/ml) were  
17  
18 more likely to be cognitively impaired (odds ratio 1.70,  
19  
20 1.03 to 2.80) than those exposed to little or no SHS<sup>[15]</sup>.  
21  
22  
23

24 Besides, each one-year increase in age resulted in a  
25  
26 0.01-point, 0.02-point, 0.04-point, 0.06-point decrease in  
27  
28 visuospatial, orientation, memory and overall cognition  
29  
30 scores, respectively. Secondhand smoke seems to be more  
31  
32 strongly associated with cognitive decline than aging.  
33  
34  
35 Study had reported that attention referred to the ability  
36  
37 to concentrate and focus on specific stimuli slightly  
38  
39 declined in later life <sup>[21]</sup>, and orientation was one's  
40  
41 ability to identify exact date, month, day and season of  
42  
43 the year. Our results did not observe the relationship  
44  
45 between SHS and orientation and attention ability, which  
46  
47 may due to the relatively small size of sample and short  
48  
49 period of cohort study after controlling for all  
50  
51 demographic and socioeconomic confounders. Visuospatial  
52  
53  
54  
55  
56  
57  
58  
59  
60



1  
2  
3  
4 abilities involve the ability to understand space in two  
5  
6 and three dimensions. In our study, an inversed relationship  
7  
8  
9 between SHS exposure and visuospatial abilities among  
10  
11 middle-aged and older adults was presented, showing a 0.04-  
12  
13 point decline in their visuospatial scores. Such an  
14  
15 inversed relationship between SHS exposure and visuospatial  
16  
17 reasoning skills were also reported among 5683 children  
18  
19 aged 6-16 years in America, showing that years of SHS  
20  
21 exposure was significantly associated with lower scores for  
22  
23 reading, math, and visuospatial skills, after adjusting for  
24  
25 covariates <sup>[14]</sup>. As one of the most common cognitive  
26  
27 complaints among elders, episodic memory refers to  
28  
29 personally experienced events which could be measured by  
30  
31 stories, word lists or figures. Previous study proved that  
32  
33 the onset of memory decline may vary among different memory  
34  
35 types, with episodic memory lasting lifelong <sup>[22]</sup>. Our study  
36  
37 could not prove the onset age of memory decline without  
38  
39 doing regression among different age groups, while the  
40  
41 memory decline caused by SHS could be presented by the  
42  
43 significant coefficient.  
44  
45  
46  
47  
48  
49  
50  
51  
52  
53

54  
55  
56 The inconsistent conclusions between our studies and  
57  
58 prior ones may probably due to the relatively simplified  
59  
60

---

1  
2  
3  
4 version of cognition test procedure in CHARLS  
5  
6 questionnaires compared with the MoCA [23] and MMSE [24]. Some  
7  
8  
9 studies also used clinical or magnetic resonance imaging  
10  
11 (MRI) evidence of neurologic damage to detect cognitive  
12  
13 impairment [25]. Best adapted to a screening test, the MoCA  
14  
15 exhibited excellent sensitivity in identifying MCI and AD  
16  
17 (Alzheimer's disease) by 90% and 100%, respectively [26].  
18  
19  
20

21  
22 The most popular hypothesis about the mechanisms  
23  
24 underlying the links between SHS exposure and poorer  
25  
26 cognitive performance lies in the notion that the carbon  
27  
28 monoxide (CO) in tobacco smoke may interfere with the  
29  
30 oxygen being delivered to the brain via the blood system.  
31  
32 However, the reasons behind different effect on various  
33  
34 domains of brain function are far from clear. One possible  
35  
36 explanation derives from an animal research. Exposing  
37  
38 animals to varying degrees of toxic mixtures of chemicals  
39  
40 found in tobacco smoke may lead to reduced neuronal mass  
41  
42 in specific regions of the brain associated with learning  
43  
44 and memory. Since the hippocampal region of the brain is  
45  
46 known to be involved in the mediation of memory [27] and  
47  
48 learning, further research should be conducted in other  
49  
50 regions dominating visuospatial and orientation ability.  
51  
52  
53  
54  
55  
56  
57  
58  
59  
60

1  
2  
3  
4 Another possible mechanism is that prolonged exposure to  
5  
6 SHS may be a significant risk factor for cardiovascular  
7  
8 disease (CVD)<sup>[28]</sup>, which may therefore lead to a range of  
9  
10 health and cognitive problems in later life. A  
11  
12 longitudinal design could elucidate this association by  
13  
14 observing long-term exposure to SHS and a potential build-  
15  
16 up of CVD as well as how these correlates with performance  
17  
18 upon a range of cognitive measures.  
19  
20  
21  
22  
23

24 Several limitations need to be considered when  
25  
26 interpreting this study and designing future studies.  
27  
28 Firstly, the exposure to secondhand smoke was evaluated  
29  
30 based on self-report measures. This might be subject to  
31  
32 recall bias and lead to over-or-underestimation of exposure  
33  
34<sup>[8]</sup>. Therefore, further studies could include more  
35  
36 biological assays, for example, cotinine residue levels or  
37  
38 nicotine residue in saliva or hair samples<sup>[29]</sup>. Previous  
39  
40 research using serum cotinine as a biomarker of exposure  
41  
42 to SHS found that higher levels of serum cotinine were  
43  
44 associated with significant worse performance in reading,  
45  
46 mathematics, and visual and spatial abilities in children  
47  
48 and adolescents<sup>[14]</sup>. However, no studies had used a  
49  
50 combination of biomarker and self-report yet<sup>[30]</sup>. Cognitive  
51  
52  
53  
54  
55  
56  
57  
58  
59  
60

1  
2  
3  
4 impairment could also be detected by the effect of  
5  
6 apolipoprotein ε4 (Apo ε4) polymorphism, which was a known  
7  
8 risk factor for dementia. Secondly, it may be impossible  
9  
10 to control for all potentially confounding variables. After  
11  
12 adjusting for age, household expenditure, education, area,  
13  
14 chronic health condition and depressive symptoms, some  
15  
16 other demographic or socioeconomic confounders may be  
17  
18 neglected. Nevertheless, this did not appear to affect the  
19  
20 magnitude of the association between SHS exposure and  
21  
22 cognition <sup>[31]</sup>. Besides, the analyses only contained  
23  
24 household SHS exposure, which precluded the analyses of the  
25  
26 influence of environment smoke inhale on smoking proclivity.  
27  
28 Whether exposure to household SHS can hasten the onset of  
29  
30 cognitive impairment for older Chinese women could be  
31  
32 further proved by running regression models in different  
33  
34 age groups.  
35  
36  
37  
38  
39  
40  
41  
42  
43  
44

#### 45 **Acknowledgments :**

46  
47  
48 We would like to thank the professor Yaohui Zhao at Centre for Chinese Economic  
49  
50 Research, Peking University for her thoughtful contributions to this study.  
51

#### 52 **Conflict of Interest**

53  
54  
55 The authors have no conflicts of interest to declare.  
56  
57

#### 58 **Author's Contribution**

1  
2  
3  
4 Anying Bai wrote and participated in all aspects of this research, including the field  
5  
6 investigation. Dr Yangmu Huang reviewed and supervised this research. Yinzi Jin  
7  
8 participated in the statistical analysis of this work and reviewed the final article.  
9  
10

### 11 **Data sharing statement**

12  
13  
14 CHARLS data is available to the public online : <http://charls.pku.edu.cn>  
15  
16

### 17 **Funding Resources**

18  
19 This is a self-funded research.  
20  
21

### 22 **References**

- 23  
24  
25 1 Fang EF, Scheibye-Knudsen M, Jahn HJ, et al. A research agenda for aging in China in the  
26  
27 21st century. *Ageing research reviews* 2015;24(Pt B):197-205. doi:  
28  
29 10.1016/j.arr.2015.08.003 [published Online First: 2015/08/26]  
30  
31  
32 2 Harada CN, Natelson Love MC, Triebel KL. Normal Cognitive Aging. *Clinics in Geriatric*  
33  
34 *Medicine* 2013;29(4):737-52. doi: 10.1016/j.cger.2013.07.002  
35  
36  
37 3 Robertson DA, Savva GM, Kenny RA. Frailty and cognitive impairment--a review of the  
38  
39 evidence and causal mechanisms. *Ageing Res Rev* 2013;12(4):840-51. doi:  
40  
41 10.1016/j.arr.2013.06.004 [published Online First: 2013/07/09]  
42  
43  
44 4 Yin P, Ma Q, Wang L, et al. Chronic obstructive pulmonary disease and cognitive  
45  
46 impairment in the Chinese elderly population: a large national survey. *International*  
47  
48 *Journal of Chronic Obstructive Pulmonary Disease* 2016 doi: 10.2147/copd.S96237  
49  
50  
51  
52 5 Bernardin F, Maheut-Bosser A, Paille Fo. Cognitive Impairments in Alcohol-Dependent  
53  
54 Subjects. *Frontiers in Psychiatry* 2014;5 doi: 10.3389/fpsy.2014.00078  
55  
56  
57  
58 6 Tadic M, Cuspidi C, Hering D. Hypertension and cognitive dysfunction in elderly: blood  
59  
60

- 
- 1  
2  
3  
4 pressure management for this global burden. *BMC Cardiovasc Disord*  
5  
6 2016;16(1):208. doi: 10.1186/s12872-016-0386-0 [published Online First:  
7  
8 2016/11/05]  
9  
10  
11 7 Taivalantti M, Barnett JH, Halt AH, et al. Depressive symptoms as predictors of visual  
12  
13 memory deficits in middle-age. *J Affect Disord* 2019;264:29-34. doi:  
14  
15 10.1016/j.jad.2019.11.125 [published Online First: 2019/12/18]  
16  
17  
18  
19 8 Ling J, Heffernan T. The Cognitive Deficits Associated with Second-Hand Smoking.  
20  
21 *Frontiers in Psychiatry* 2016;7 doi: 10.3389/fpsy.2016.00046  
22  
23  
24  
25 9 Durazzo TC, Meyerhoff DJ, Nixon SJ. A comprehensive assessment of neurocognition in  
26  
27 middle-aged chronic cigarette smokers. *Drug Alcohol Depend* 2012;122(1-2):105-11.  
28  
29 doi: 10.1016/j.drugalcdep.2011.09.019 [published Online First: 2011/10/14]  
30  
31  
32  
33 10 Teo KK, Ounpuu S, Hawken S, et al. Tobacco use and risk of myocardial infarction in 52  
34  
35 countries in the INTERHEART study: a case-control study. *The Lancet*  
36  
37 2006;368(9536):647-58. doi: 10.1016/s0140-6736(06)69249-0  
38  
39  
40  
41 11 Kim BJ, Kang JG, Kim JH, et al. Association between Secondhand Smoke Exposure and  
42  
43 Hypertension in 106,268 Korean Self-Reported Never-Smokers Verified by Cotinine.  
44  
45 *Journal of clinical medicine* 2019;8(8) doi: 10.3390/jcm8081238 [published Online  
46  
47 First: 2019/08/21]  
48  
49  
50  
51 12 Malek AM, Cushman M, Lackland DT, et al. Secondhand Smoke Exposure and Stroke:  
52  
53 The Reasons for Geographic and Racial Differences in Stroke (REGARDS) Study.  
54  
55 *American journal of preventive medicine* 2015;49(6):e89-97. doi:  
56  
57 10.1016/j.amepre.2015.04.014 [published Online First: 2015/06/29]  
58  
59  
60

- 
- 1  
2  
3  
4 13 Heffernan TM, O'Neill TS. Everyday prospective memory and executive function deficits  
5  
6 associated with exposure to second-hand smoke. *Journal of addiction*  
7  
8  
9 2013;2013:160486. doi: 10.1155/2013/160486 [published Online First: 2013/01/01]  
10  
11  
12 14 Yolton K, Dietrich K, Auinger P, et al. Exposure to environmental tobacco smoke and  
13  
14 cognitive abilities among U.S. children and adolescents. *Environ Health Perspect*  
15  
16 2005;113(1):98-103. doi: 10.1289/ehp.7210 [published Online First: 2005/01/01]  
17  
18  
19 15 Llewellyn DJ, Lang IA, Langa KM, et al. Exposure to secondhand smoke and cognitive  
20  
21 impairment in non-smokers: national cross sectional study with cotinine  
22  
23 measurement. *Bmj* 2009;338(feb12 2):b462-b62. doi: 10.1136/bmj.b462  
24  
25  
26  
27 16 Pan X, Luo Y, Roberts AR. Secondhand Smoke and Women's Cognitive Function in  
28  
29 China. *American Journal of Epidemiology* 2018;187(5):911-18. doi:  
30  
31 10.1093/aje/kwx377  
32  
33  
34  
35 17 Zhao Y, Hu Y, Smith JP, et al. Cohort Profile: The China Health and Retirement  
36  
37 Longitudinal Study (CHARLS). *International Journal of Epidemiology* 2012;43(1):61-  
38  
39 68. doi: 10.1093/ije/dys203  
40  
41  
42  
43 18 Ge S, Wei Z, Liu T, et al. Alcohol Use and Cognitive Functioning Among Middle-Aged and  
44  
45 Older Adults in China: Findings of the China Health and Retirement Longitudinal  
46  
47 Study Baseline Survey. *Alcohol Clin Exp Res* 2018;42(10):2054-60. doi:  
48  
49 10.1111/acer.13861 [published Online First: 2018/08/07]  
50  
51  
52  
53 19 Li J, Cacchione PZ, Hodgson N, et al. Afternoon Napping and Cognition in Chinese Older  
54  
55 Adults: Findings from the China Health and Retirement Longitudinal Study Baseline  
56  
57 Assessment. *J Am Geriatr Soc* 2017;65(2):373-80. doi: 10.1111/jgs.14368 [published  
58  
59  
60

- 1  
2  
3  
4 Online First: 2016/12/21]  
5  
6  
7 20 Moheet A, Mangia S, Seaquist ER. Impact of diabetes on cognitive function and brain  
8  
9 structure. *Annals of the New York Academy of Sciences* 2015;1353(1):60-71. doi:  
10  
11 10.1111/nyas.12807  
12  
13  
14 21 Burk JA, Blumenthal SA, Maness EB. Neuropharmacology of attention. *European journal*  
15  
16 *of pharmacology* 2018;835:162-68. doi: 10.1016/j.ejphar.2018.08.008 [published  
17  
18 Online First: 2018/08/10]  
19  
20  
21  
22 22 Lövdén M, Rönnlund M, Wahlin A, et al. The extent of stability and change in episodic and  
23  
24 semantic memory in old age: demographic predictors of level and change. *The*  
25  
26 *journals of gerontology Series B, Psychological sciences and social sciences*  
27  
28 2004;59(3):P130-4. doi: 10.1093/geronb/59.3.p130 [published Online First:  
29  
30 2004/05/01]  
31  
32  
33  
34  
35 23 Li X, Jia S, Zhou Z, et al. The role of the Montreal Cognitive Assessment (MoCA) and its  
36  
37 memory tasks for detecting mild cognitive impairment. *Neurol Sci* 2018;39(6):1029-  
38  
39 34. doi: 10.1007/s10072-018-3319-0 [published Online First: 2018/03/20]  
40  
41  
42  
43 24 Trzepacz PT, Hochstetler H, Wang S, et al. Relationship between the Montreal Cognitive  
44  
45 Assessment and Mini-mental State Examination for assessment of mild cognitive  
46  
47 impairment in older adults. *BMC Geriatr* 2015;15(107):107. doi: 10.1186/s12877-015-  
48  
49 0103-3 [published Online First: 2015/09/09]  
50  
51  
52  
53 25 Xue LL, Wang F, Niu RZ, et al. Offspring of rats with cerebral hypoxia-ischemia manifest  
54  
55 cognitive dysfunction in learning and memory abilities. *Neural regeneration research*  
56  
57 2020;15(9):1662-70. doi: 10.4103/1673-5374.276359 [published Online First:  
58  
59  
60



2020/03/27]

- 26 Ziad S. Nasreddine M. The Montreal Cognitive Assessment (MoCA)- Concept and Clinical Review. *the American Geriatrics Society* 2005;53(4):695-99.
- 27 Staples MC, Mandyam CD. Thinking after Drinking: Impaired Hippocampal-Dependent Cognition in Human Alcoholics and Animal Models of Alcohol Dependence. *Frontiers in Psychiatry* 2016;7 doi: 10.3389/fpsyt.2016.00162
- 28 Yankelevitz DF, Henschke CI, Yip R, et al. Second-Hand Tobacco Smoke in Never Smokers Is a Significant Risk Factor for Coronary Artery Calcification. *JACC: Cardiovascular Imaging* 2013;6(6):651-57. doi: 10.1016/j.jcmg.2013.02.004
- 29 Akhtar WZ, Andresen EM, Cannell MB, et al. Association of blood cotinine level with cognitive and physical performance in non-smoking older adults. *Environmental Research* 2013;121:64-70. doi: 10.1016/j.envres.2012.10.013
- 30 Stirland LE, O'Shea CI, Russ TC. Passive smoking as a risk factor for dementia and cognitive impairment: systematic review of observational studies. *Int Psychogeriatr* 2018;30(8):1177-87. doi: 10.1017/S1041610217002824 [published Online First: 2017/12/19]
- 31 Chen R, Clifford A, Lang L, et al. Is exposure to secondhand smoke associated with cognitive parameters of children and adolescents?-a systematic literature review. *Annals of Epidemiology* 2013;23(10):652-61. doi: 10.1016/j.annepidem.2013.07.001

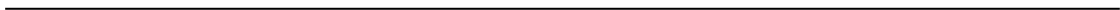

1  
2  
3  
4  
5  
6  
7  
8  
9  
10  
11  
12  
13  
14  
15  
16  
17  
18  
19  
20  
21  
22  
23  
24  
25  
26  
27  
28  
29  
30  
31  
32  
33  
34  
35  
36  
37  
38  
39  
40  
41  
42  
43  
44  
45  
46  
47  
48  
49  
50  
51  
52  
53  
54  
55  
56  
57  
58  
59  
60

For peer review only

Table 1. Characteristics of the Participants from 3 waves of CHARLS, 2011-2013-2015

| Variable                                  | 2011-2013<br>(N=2802) |           | 2011-2015<br>(N=2274) |           | 2013-2015<br>(N=1799) |           |
|-------------------------------------------|-----------------------|-----------|-----------------------|-----------|-----------------------|-----------|
|                                           | Count                 | Frequency | Count                 | Frequency | Count                 | Frequency |
| <b>Area</b>                               |                       |           |                       |           |                       |           |
| Urban                                     | 981                   | 35.01%    | 730                   | 32.10%    | 556                   | 30.91%    |
| Rural                                     | 1821                  | 64.99%    | 1544                  | 67.90%    | 1243                  | 69.09%    |
| <b>Secondhand Smoke</b>                   |                       |           |                       |           |                       |           |
| Less than 25 years                        | 759                   | 27.09%    | 531                   | 23.35%    | 262                   | 14.56%    |
| More than 25 years and less than 30 years | 634                   | 22.63%    | 573                   | 25.20%    | 385                   | 21.40%    |
| More than 30 years and less than 40 years | 911                   | 32.51%    | 800                   | 35.18%    | 768                   | 42.69%    |
| More than 40 years                        | 498                   | 17.77%    | 370                   | 16.27%    | 384                   | 21.35%    |
| <b>Education</b>                          |                       |           |                       |           |                       |           |
| Illiterate                                | 1552                  | 55.39%    | 1309                  | 57.56%    | 1004                  | 55.81%    |
| Primary education                         | 512                   | 18.27%    | 414                   | 18.21%    | 336                   | 18.68%    |
| Secondary or above                        | 738                   | 26.34%    | 551                   | 24.23%    | 459                   | 25.51%    |
| <b>Hypertension</b>                       |                       |           |                       |           |                       |           |
| No hypertension                           | 2124                  | 75.80%    | 1720                  | 75.64%    | 1365                  | 75.88%    |
| Hypertension with treatment               | 522                   | 18.63%    | 1720                  | 75.64%    | 358                   | 19.90%    |
| Hypertension without treatment            | 156                   | 5.57%     | 130                   | 5.72%     | 76                    | 4.22%     |

**Diabetes**

|                                 |      |        |      |        |      |        |
|---------------------------------|------|--------|------|--------|------|--------|
| No Diabetes in baseline         | 2643 | 94.33% | 2140 | 94.11% | 1704 | 94.72% |
| Have Diabetes with treatment    | 143  | 5.10%  | 120  | 5.28%  | 86   | 4.78%  |
| Have Diabetes without treatment | 16   | 0.57%  | 14   | 0.62%  | 9    | 0.50%  |

|                                                 | Count | Mean (SD)           | Count | Mean (SD)           | Count | Mean (SD)           |
|-------------------------------------------------|-------|---------------------|-------|---------------------|-------|---------------------|
| Age                                             | 2802  | 55.84 (8.22)        | 2274  | 56.19 (7.75)        | 1799  | 57.90 (7.43)        |
| Annual Household Expenditure, yuan <sup>a</sup> | 2802  | 13786.99 (14197.29) | 2274  | 13060.14 (13639.33) | 1799  | 16632.84 (18568.24) |
| Visuospatial ability <sup>b</sup>               | 2802  | 0.51 (0.50)         | 2274  | 0.48 (0.50)         | 1799  | 0.49 (0.50)         |
| Orientation and attention <sup>c</sup>          | 2802  | 5.87 (3.29)         | 2274  | 5.84 (3.19)         | 1799  | 5.97 (3.14)         |
| Memory Scores <sup>d</sup>                      | 2802  | 3.33 (1.96)         | 2274  | 3.04 (1.93)         | 1799  | 3.15 (1.91)         |
| Baseline Visuospatial ability                   | 2802  | 0.57 (0.50)         | 2274  | 0.55 (0.50)         | 1799  | 0.54 (0.50)         |
| Baseline Orientation and attention              | 2802  | 6.39 (2.92)         | 2274  | 6.25 (2.90)         | 1799  | 6.16 (3.00)         |
| Baseline Memory Scores                          | 2802  | 3.27 (1.98)         | 2274  | 3.23 (1.92)         | 1799  | 3.50 (1.78)         |
| Baseline CES-D Score <sup>e</sup>               | 2802  | 12.09 (5.38)        | 2274  | 12.13 (5.45)        | 1799  | 10.90 (5.14)        |

Abbreviation: SHS, secondhand smoke.

a 1 US dollar = 6.3 yuan.

b The score range for visuospatial ability was 0-1.

c The score range for orientation and attention was 0-10. Higher scores indicate better mental status.

d The score range for episodic memory was 0-10. Higher scores indicate better memory function.

e A score of 10 or greater indicated the presence of depressive symptoms.

Table 2. Multivariable linear regression analysis of the relationship between smoking exposure and Visuospatial function and Orientation and Attention among older Chinese women (N = 6875), 2011-2013-2015

| VARIABLES                                    | Visuospatial Scores    |              |       | Orientation and Attention |              |       |
|----------------------------------------------|------------------------|--------------|-------|---------------------------|--------------|-------|
|                                              | $\beta$<br>coefficient | 95%CI        | t     | $\beta$ coefficient       | 95%CI        | t     |
| <b>Age</b>                                   | -0.01 <sup>a</sup>     | -0.01, -0.00 | -6.73 | -0.02 <sup>a</sup>        | -0.03, -0.01 | -4.34 |
| <b>Expenditure</b>                           | 0.00                   | 0.00, 0.00   | 0.01  | 0.00 <sup>a</sup>         | 0.00, 0.00   | 0.77  |
| <b>Secondhand Smoke Exposure<sup>d</sup></b> |                        |              |       |                           |              |       |
| <b>25 to &lt;30 years</b>                    | -0.01                  | -0.04, 0.02  | -0.72 | 0.05                      | -0.12, 0.21  | 0.56  |
| <b>≥30 to &lt;40 years</b>                   | -0.02                  | -0.05, 0.02  | -0.95 | -0.03                     | -0.20, 0.13  | -0.38 |
| <b>≥ 40 years</b>                            | -0.04 <sup>c</sup>     | -0.08, 0.01  | -1.67 | -0.15                     | -0.38, 0.09  | -1.24 |
| <b>Baseline Visuospatial Scores</b>          | 0.23 <sup>a</sup>      | 0.21, 0.26   | 17.93 |                           |              |       |

1  
2  
3  
4  
5  
6  
7  
8  
9  
10  
11  
12  
13  
14  
15  
16  
17  
18  
19  
20  
21  
22  
23  
24  
25  
26  
27  
28  
29  
30  
31  
32  
33  
34  
35  
36  
37  
38  
39  
40  
41  
42  
43  
44  
45  
46

|                                    |                    |             |       |  |                    |              |       |
|------------------------------------|--------------------|-------------|-------|--|--------------------|--------------|-------|
| <b>Baseline Orientation Scores</b> |                    |             |       |  | 0.55 <sup>a</sup>  | 0.53, 0.57   | 44.86 |
| <b>Urban<sup>e</sup></b>           | 0.06 <sup>a</sup>  | 0.04, 0.09  | 5.27  |  | 0.38 <sup>a</sup>  | 0.25, 0.51   | 5.72  |
| <b>Education<sup>f</sup></b>       |                    |             |       |  |                    |              |       |
| <b>Primary</b>                     | 0.23 <sup>a</sup>  | 0.20, 0.26  | 14.00 |  | 1.11 <sup>a</sup>  | 0.94, 1.27   | 12.91 |
| <b>Secondary or Above</b>          | 0.29 <sup>a</sup>  | 0.26, 0.32  | 18.51 |  | 1.18 <sup>a</sup>  | 1.01, 1.36   | 13.44 |
| <b>Hypertension<sup>g</sup></b>    |                    |             |       |  |                    |              |       |
| <b>With Treatment</b>              | -0.03              | -0.09, 0.02 | -1.20 |  | 0.06               | -0.24, 0.35  | -0.38 |
| <b>Without Treatment</b>           | -0.02              | -0.06, 0.03 | -0.69 |  | 0.06               | -0.11, 0.24  | 0.04  |
| <b>Missing Group</b>               | -0.05 <sup>c</sup> | -0.12, 0.01 | -1.67 |  | 0.06               | -0.19, 0.30  | -0.01 |
| <b>Diabetes<sup>h</sup></b>        |                    |             |       |  |                    |              |       |
| <b>With Treatment</b>              | 0.02               | -0.03, 0.07 | 0.90  |  | 0.25 <sup>c</sup>  | -0.03, 0.52  | -1.77 |
| <b>Without Treatment</b>           | 0.03               | -0.04, 0.09 | 0.82  |  | 0.21               | -0.06, 0.48  | -0.23 |
| <b>Missing Group</b>               | 0.07               | -0.08, 0.21 | 0.88  |  | 0.50               | -0.22, 1.23  | 0.67  |
| <b>Baseline CES-D Score</b>        | -0.00 <sup>c</sup> | -0.00, 0.00 | -1.71 |  | -0.02 <sup>b</sup> | -0.03, -0.00 | -2.57 |
| <b>year = 2</b>                    | -0.02              | -0.04, 0.01 | -1.58 |  | 0.09               | -0.05, 0.22  | 1.29  |

1  
2  
3  
4  
5 Abbreviations: CI, confidence interval; SHS, secondhand smoke.

6 a.  $p < 0.01$

7 b.  $p < 0.05$

8 c.  $p < 0.1$

9 d. Referent: No SHS exposure or Less than 25 years.

10 e. Expenditure is expressed as the natural log of the annual household expenditure

11 f. Referent: Illiterate

12 g. Referent: Without hypertension

13 h. Referent: Without diabetes

14  
15  
16  
17  
18  
19  
20  
21  
22  
23  
24  
25  
26  
27  
28  
29  
30  
31  
32  
33  
34  
35  
36  
37  
38  
39  
40  
41  
42  
43  
44  
45  
46

For peer review only

Table 3. Multivariable linear regression analysis of the relationship between smoking exposure and Episodic memory and Overall cognitive function among older Chinese women (N = 6875), 2011-2013-2015

| VARIABLES                                    | Episodic Memory        |              |        | Overall Cognition Scores |              |       |
|----------------------------------------------|------------------------|--------------|--------|--------------------------|--------------|-------|
|                                              | $\beta$<br>coefficient | 95%CI        | t      | $\beta$ coefficient      | 95%CI        | t     |
| <b>Age</b>                                   | -0.04 <sup>a</sup>     | -0.05, -0.03 | -11.37 | -0.06 <sup>a</sup>       | -0.07, -0.04 | -7.87 |
| <b>Expenditure</b>                           | 0.00                   | 0.00, 0.00   | 1.30   | 0.00 <sup>a</sup>        | 0.00, 0.00   | 0.32  |
| <b>Secondhand Smoke Exposure<sup>d</sup></b> |                        |              |        |                          |              |       |
| <b>25 to &lt;30 years</b>                    | -0.04                  | -0.16, 0.08  | -0.67  | -0.01                    | -0.25, 0.25  | -0.01 |
| <b>≥30 to &lt;40 years</b>                   | 0.02                   | -0.09, 0.13  | 0.36   | -0.05                    | -0.29, 0.19  | -0.41 |
| <b>≥ 40 years</b>                            | -0.16 <sup>b</sup>     | -0.31, -0.01 | -2.06  | -0.33 <sup>a</sup>       | -0.66, 0.01  | -1.93 |
| <b>Baseline Memory Scores</b>                | 0.30 <sup>a</sup>      | 0.28, 0.32   | 25.22  |                          |              |       |



|                                  |                    |              |       |                   |             |       |
|----------------------------------|--------------------|--------------|-------|-------------------|-------------|-------|
| <b>Baseline Cognition Scores</b> |                    |              |       | 0.55 <sup>a</sup> | 0.46, 0.83  | 44.95 |
| <b>Urban<sup>e</sup></b>         | 0.25 <sup>a</sup>  | 0.16, 0.34   | 5.60  | 0.65 <sup>a</sup> | 0.46, 0.83  | 6.68  |
| <b>Education<sup>f</sup></b>     |                    |              |       |                   |             |       |
| <b>Primary</b>                   | 0.70 <sup>a</sup>  | 0.58, 0.80   | 12.42 | 1.77 <sup>a</sup> | 1.53, 2.02  | 14.28 |
| <b>Secondary or Above</b>        | 0.97 <sup>a</sup>  | 0.86, 1.08   | 17.29 | 2.00 <sup>a</sup> | 1.74, 2.26  | 15.24 |
| <b>Hypertension<sup>g</sup></b>  |                    |              |       |                   |             |       |
| <b>With Treatment</b>            | 0.04               | -0.16, 0.23  | 0.35  | 0.13              | -0.29, 0.56 | 0.62  |
| <b>Without Treatment</b>         | 0.06               | -0.06, 0.17  | 0.95  | 0.12              | -0.14, 0.38 | 0.93  |
| <b>Missing Group</b>             | 0.07               | -0.12, 0.25  | 0.70  | 0.10              | -0.27, 0.47 | 0.52  |
| <b>Diabetes<sup>h</sup></b>      |                    |              |       |                   |             |       |
| <b>With Treatment</b>            | -0.20 <sup>b</sup> | -0.38, 0.02  | -2.20 | -0.04             | -0.43, 0.36 | 0.62  |
| <b>Without Treatment</b>         | -0.07              | -0.25, 0.11  | -0.77 | 0.08              | -0.30, 0.47 | 0.43  |
| <b>Missing Group</b>             | 0.32               | -0.16, 0.80  | 1.30  | 0.87              | -0.11, 1.84 | 1.75  |
| <b>Baseline CES-D Score</b>      | -0.01 <sup>b</sup> | -0.01, 0.00  | -1.59 | -0.01             | -0.03, 0.00 | -2.57 |
| <b>year = 2</b>                  | -0.24              | -0.33, -0.15 | -5.21 | -0.17             | -0.37, 0.03 | -1.70 |

1  
2  
3  
4  
5  
6  
7  
8  
9  
10  
11  
12  
13  
14  
15  
16  
17  
18  
19  
20  
21  
22  
23  
24  
25  
26  
27  
28  
29  
30  
31  
32  
33  
34  
35  
36  
37  
38  
39  
40  
41  
42  
43  
44  
45  
46

---

|                 |      |            |       |                   |            |       |
|-----------------|------|------------|-------|-------------------|------------|-------|
| <b>Constant</b> | 0.63 | 0.53, 0.74 | 11.54 | 6.48 <sup>a</sup> | 5.59, 7.37 | 14.28 |
|-----------------|------|------------|-------|-------------------|------------|-------|

---

Abbreviations: CI, confidence interval; SHS, secondhand smoke.

- a. p<0.01
- b. p<0.05
- c. p<0.1
- d. Referent: No SHS exposure or Less than 25 years.
- e. Expenditure is expressed as the natural log of the annual household expenditure
- f. Referent: Illiterate
- g. Referent: Without hypertension
- h. Referent: Without diabetes

For peer review only

STROBE Statement—Checklist of items that should be included in reports of *cohort studies*

|                              | Item No | Recommendation                                                                                                                                                                                                                                                                                                         | Page No |
|------------------------------|---------|------------------------------------------------------------------------------------------------------------------------------------------------------------------------------------------------------------------------------------------------------------------------------------------------------------------------|---------|
| <b>Title and abstract</b>    | 1       | (a) Indicate the study's design with a commonly used term in the title or the abstract<br>(b) Provide in the abstract an informative and balanced summary of what was done and what was found                                                                                                                          | 1-3     |
| <b>Introduction</b>          |         |                                                                                                                                                                                                                                                                                                                        |         |
| Background/rationale         | 2       | Explain the scientific background and rationale for the investigation being reported                                                                                                                                                                                                                                   | 4       |
| Objectives                   | 3       | State specific objectives, including any prespecified hypotheses                                                                                                                                                                                                                                                       | 5       |
| <b>Methods</b>               |         |                                                                                                                                                                                                                                                                                                                        |         |
| Study design                 | 4       | Present key elements of study design early in the paper                                                                                                                                                                                                                                                                | 6       |
| Setting                      | 5       | Describe the setting, locations, and relevant dates, including periods of recruitment, exposure, follow-up, and data collection                                                                                                                                                                                        | 6       |
| Participants                 | 6       | (a) Give the eligibility criteria, and the sources and methods of selection of participants. Describe methods of follow-up<br>(b) For matched studies, give matching criteria and number of exposed and unexposed                                                                                                      | 6       |
| Variables                    | 7       | Clearly define all outcomes, exposures, predictors, potential confounders, and effect modifiers. Give diagnostic criteria, if applicable                                                                                                                                                                               | 7-9     |
| Data sources/<br>measurement | 8*      | For each variable of interest, give sources of data and details of methods of assessment (measurement). Describe comparability of assessment methods if there is more than one group                                                                                                                                   | 7-9     |
| Bias                         | 9       | Describe any efforts to address potential sources of bias                                                                                                                                                                                                                                                              | 9       |
| Study size                   | 10      | Explain how the study size was arrived at                                                                                                                                                                                                                                                                              | 6       |
| Quantitative variables       | 11      | Explain how quantitative variables were handled in the analyses. If applicable, describe which groupings were chosen and why                                                                                                                                                                                           | 7-9     |
| Statistical methods          | 12      | (a) Describe all statistical methods, including those used to control for confounding<br>(b) Describe any methods used to examine subgroups and interactions<br>(c) Explain how missing data were addressed<br>(d) If applicable, explain how loss to follow-up was addressed<br>(e) Describe any sensitivity analyses | 9-10    |
| <b>Results</b>               |         |                                                                                                                                                                                                                                                                                                                        |         |
| Participants                 | 13*     | (a) Report numbers of individuals at each stage of study—eg numbers potentially eligible, examined for eligibility, confirmed eligible, included in the study, completing follow-up, and analysed<br>(b) Give reasons for non-participation at each stage<br>(c) Consider use of a flow diagram                        | 6       |
| Descriptive data             | 14*     | (a) Give characteristics of study participants (eg demographic, clinical, social) and information on exposures and potential confounders<br>(b) Indicate number of participants with missing data for each variable of interest<br>(c) Summarise follow-up time (eg, average and total amount)                         | 10-11   |
| Outcome data                 | 15*     | Report numbers of outcome events or summary measures over time                                                                                                                                                                                                                                                         | 11      |

|    |                          |    |                                                                                                                                                                                                              |       |
|----|--------------------------|----|--------------------------------------------------------------------------------------------------------------------------------------------------------------------------------------------------------------|-------|
| 1  | Main results             | 16 | (a) Give unadjusted estimates and, if applicable, confounder-adjusted estimates and their precision (eg, 95% confidence interval). Make clear which confounders were adjusted for and why they were included | 11    |
| 2  |                          |    | (b) Report category boundaries when continuous variables were categorized                                                                                                                                    |       |
| 3  |                          |    | (c) If relevant, consider translating estimates of relative risk into absolute risk for a meaningful time period                                                                                             |       |
| 4  |                          |    |                                                                                                                                                                                                              |       |
| 5  |                          |    |                                                                                                                                                                                                              |       |
| 6  |                          |    |                                                                                                                                                                                                              |       |
| 7  |                          |    |                                                                                                                                                                                                              |       |
| 8  |                          |    |                                                                                                                                                                                                              |       |
| 9  | Other analyses           | 17 | Report other analyses done—eg analyses of subgroups and interactions, and sensitivity analyses                                                                                                               | 11-12 |
| 10 |                          |    |                                                                                                                                                                                                              |       |
| 11 | <b>Discussion</b>        |    |                                                                                                                                                                                                              |       |
| 12 |                          |    |                                                                                                                                                                                                              |       |
| 13 | Key results              | 18 | Summarise key results with reference to study objectives                                                                                                                                                     | 12    |
| 14 | Limitations              | 19 | Discuss limitations of the study, taking into account sources of potential bias or imprecision. Discuss both direction and magnitude of any potential bias                                                   | 15-16 |
| 15 |                          |    |                                                                                                                                                                                                              |       |
| 16 | Interpretation           | 20 | Give a cautious overall interpretation of results considering objectives, limitations, multiplicity of analyses, results from similar studies, and other relevant evidence                                   | 13-15 |
| 17 |                          |    |                                                                                                                                                                                                              |       |
| 18 |                          |    |                                                                                                                                                                                                              |       |
| 19 | Generalisability         | 21 | Discuss the generalisability (external validity) of the study results                                                                                                                                        | 12    |
| 20 |                          |    |                                                                                                                                                                                                              |       |
| 21 | <b>Other information</b> |    |                                                                                                                                                                                                              |       |
| 22 | Funding                  | 22 | Give the source of funding and the role of the funders for the present study and, if applicable, for the original study on which the present article is based                                                | 17    |
| 23 |                          |    |                                                                                                                                                                                                              |       |
| 24 |                          |    |                                                                                                                                                                                                              |       |

25  
26 \*Give information separately for exposed and unexposed groups.

27  
28 **Note:** An Explanation and Elaboration article discusses each checklist item and gives methodological background and  
29 published examples of transparent reporting. The STROBE checklist is best used in conjunction with this article (freely  
30 available on the Web sites of PLoS Medicine at <http://www.plosmedicine.org/>, Annals of Internal Medicine at  
31 <http://www.annals.org/>, and Epidemiology at <http://www.epidem.com/>). Information on the STROBE Initiative is  
32 available at <http://www.strobe-statement.org>.  
33  
34  
35  
36  
37  
38  
39  
40  
41  
42  
43  
44  
45  
46  
47  
48  
49  
50  
51  
52  
53  
54  
55  
56  
57  
58  
59  
60

# BMJ Open

## Exposure to Secondhand Smoke and Cognitive Function Among Middle-aged and Older Women in China: Findings of 3-waves of the China Health and Retirement Longitudinal Study

|                                 |                                                                                                                                                                                                                              |
|---------------------------------|------------------------------------------------------------------------------------------------------------------------------------------------------------------------------------------------------------------------------|
| Journal:                        | <i>BMJ Open</i>                                                                                                                                                                                                              |
| Manuscript ID                   | bmjopen-2020-039824.R2                                                                                                                                                                                                       |
| Article Type:                   | Original research                                                                                                                                                                                                            |
| Date Submitted by the Author:   | 13-Sep-2020                                                                                                                                                                                                                  |
| Complete List of Authors:       | Bai, Anying; Peking University Health Science Centre, School of Public Health;<br>Jin, Yinzi; Peking University, School of Public Health<br>Huang, Yangmu; Peking University Health Science Centre, School of Public Health; |
| <b>Primary Subject Heading</b>: | Epidemiology                                                                                                                                                                                                                 |
| Secondary Subject Heading:      | Smoking and tobacco, Public health, Mental health                                                                                                                                                                            |
| Keywords:                       | EPIDEMIOLOGY, Dementia < NEUROLOGY, PUBLIC HEALTH                                                                                                                                                                            |
|                                 |                                                                                                                                                                                                                              |

SCHOLARONE™  
Manuscripts



I, the Submitting Author has the right to grant and does grant on behalf of all authors of the Work (as defined in the below author licence), an exclusive licence and/or a non-exclusive licence for contributions from authors who are: i) UK Crown employees; ii) where BMJ has agreed a CC-BY licence shall apply, and/or iii) in accordance with the terms applicable for US Federal Government officers or employees acting as part of their official duties; on a worldwide, perpetual, irrevocable, royalty-free basis to BMJ Publishing Group Ltd ("BMJ") its licensees and where the relevant Journal is co-owned by BMJ to the co-owners of the Journal, to publish the Work in this journal and any other BMJ products and to exploit all rights, as set out in our [licence](#).

The Submitting Author accepts and understands that any supply made under these terms is made by BMJ to the Submitting Author unless you are acting as an employee on behalf of your employer or a postgraduate student of an affiliated institution which is paying any applicable article publishing charge ("APC") for Open Access articles. Where the Submitting Author wishes to make the Work available on an Open Access basis (and intends to pay the relevant APC), the terms of reuse of such Open Access shall be governed by a Creative Commons licence – details of these licences and which [Creative Commons](#) licence will apply to this Work are set out in our licence referred to above.

Other than as permitted in any relevant BMJ Author's Self Archiving Policies, I confirm this Work has not been accepted for publication elsewhere, is not being considered for publication elsewhere and does not duplicate material already published. I confirm all authors consent to publication of this Work and authorise the granting of this licence.

---

1 **Title**

2 Exposure to Secondhand Smoke and Cognitive Function Among  
3 Middle-aged and Older Women in China: Findings of 3-waves  
4 of the China Health and Retirement Longitudinal Study

5 Anying, Bai <sup>1</sup>, Yinzi Jin Ph.D.<sup>1</sup>, Yangmu Huang Ph.D.<sup>1</sup>

6 <sup>1</sup> School of Public Health, Peking University Health and  
7 Science Centre

8

9

10

11

12

13

14

15

16

17

18

19

20

21

22

23

24

25

26

27

28 Corresponding Author:

29 Yangmu Huang, Ph.D.

30 Peking University Health and Science Centre, School of  
31 Public Health

32 Xueyuan Road No.38, Haidian Distreet, BeiJing, China

33 Tel: 15010376131

34 Fax: 010-62755782

35 Email: ymhuang@bjmu.edu.cn

36

37

38

39

40

41

42

43

38

39

40

---

**Abstract**

**Objectives:** To examine the association between secondhand smoke and women's global cognitive function and cognitive subdomains.

**Design:** Cohort study

**Participants:** Data for this study were obtained from the China Health and Retirement Longitudinal Study (CHARLS, 2011-2013-2015), and pooled analysis was applied to wave 1 and wave 2 (2011-2013), wave 2 and wave 3 (2013-2015) and wave 1 and wave 3 (2011-2015). Data from a total of 6875 Chinese women with normal cognitive function in baseline were selected for analysis, including 2981 who were interviewed in 2011, 2471 in 2013, and 1894 in 2015.

**Main outcome measures and methods:** Secondhand smoke was classified based on the length of exposed years (<25years, ≥25 to <30 years, ≥30 to <40 years, ≥40 years). Global cognitive function, visuospatial ability, orientation and attention, as well as episodic memory function were used as measures of cognitive function. Three waves of data were pooled by using dummy variable



1  
2  
3  
4 61 to differentiate between 2-year and 4-year. Lagged  
5  
6 62 dependent variable models were used to examine  
7  
8  
9 63 independent associations between secondhand smoke and  
10  
11 64 cognitive function. Demographic factors, socioeconomic  
12  
13  
14 65 factors, baseline cognitive functioning and health  
15  
16  
17 66 conditions were controlled in our models.

18  
19 67 **Results:** Secondhand smoke was found to be inversely and  
20  
21  
22 68 significantly associated with cognitive function.  
23  
24  
25 69 Compared with those had not been exposed to household  
26  
27 70 secondhand smoke, women who had lived with a smoking  
28  
29  
30 71 husband had significantly faster cognition decline,  
31  
32  
33 72 especially in global cognitive function ( $\beta=-0.33$ , 95%CI=  
34  
35 73  $-0.66$  to  $-0.01$ ,  $P < 0.01$ ), visuospatial ability ( $\beta=-0.04$ ,  
36  
37 74 95%CI= $-0.08$  to  $-0.01$   $P < 0.05$ ) and episodic memory  
38  
39  
40 75 function ( $\beta=-0.16$ , 95%CI=  $-0.31$  to  $-0.01$   $P = 0.031$ ).

41  
42  
43 76 **Conclusions:** Household secondhand smoke exposure for more  
44  
45  
46 77 than 40 years was associated with a more significant  
47  
48  
49 78 decline in global cognitive function, visuospatial  
50  
51  
52 79 ability and episodic memory function, but not in  
53  
54  
55 80 orientation and attention function among older Chinese  
56  
57  
58 81 women.

59 82 **Key words:** ageing; passive smoking; panel analysis;  
60

1  
2  
3  
4 83 visuospatial ability; memory  
5

6  
7 84 **Strengths and limitations of this study:**  
8

9 85 ➤ This is the first study to investigate on the  
10  
11 86 association between secondhand smoke exposure and  
12  
13 87 women's different domains of cognitive functions in  
14  
15 88 China by using a 4-year longitudinal national  
16  
17 89 representative data.  
18  
19

20  
21  
22 90 ➤ This study addressed the issue of reverse causation in observational cohort studies  
23  
24 91 by used lagged dependent variable models and adjust for baseline cognition scores  
25  
26

27 92 ➤ The exposure to secondhand smoke was evaluated based on  
28  
29 93 self-report measures.  
30  
31

32 94 ➤ The analyses only contained household SHS exposure and  
33  
34 95 excluding environmental exposure.  
35  
36

37  
38 96

39  
40 97 **Word Count: 3295**  
41

42  
43 98 **Number of references:32**  
44

45 99 **Number of data elements:1**  
46  
47

48 100

49  
50 101 **Introduction**  
51

52  
53 102 China's population has been ageing rapidly. By 2050,  
54  
55 103 there will be 400 million Chinese citizens aged over 65  
56  
57 104 years old, and 150 million of whom will be older than 80  
58  
59  
60

1  
2  
3  
4 105 years old<sup>[1]</sup>. It will become increasingly important to  
5  
6 106 understand the cognitive changes that accompany ageing<sup>[2]</sup>.  
7  
8  
9 107 Cognitive impairment, described as a decline in  
10  
11 108 intellectual functions<sup>[3]</sup>, ranges from mild forms of  
12  
13  
14 109 forgetfulness to severe and debilitating dementia <sup>[4]</sup>. The  
15  
16  
17 110 prevalence of cognitive impairment is rising, with national  
18  
19 111 figures estimating that over 9.4% of older persons in China  
20  
21  
22 112 had cognitive impairment in 2011 <sup>[4]</sup>.

23  
24 113 Numerous determinants such as environmental, individual,  
25  
26  
27 114 and genetic factors could favor evolution toward cognitive  
28  
29  
30 115 impairment, and both age and late-life hypertension  
31  
32  
33 116 increase the risk of dementia over time <sup>[5]</sup>. The mechanism  
34  
35  
36 117 lies in age-related functional and structural changes in  
37  
38 118 cerebrovascular small and large blood vessels <sup>[6]</sup>. Besides  
39  
40  
41 119 chronic diseases factors, depression has long been known  
42  
43  
44 120 to affect memory and other neurocognitive domains. Previous  
45  
46  
47 121 studies have emphasized that depression could increase the  
48  
49  
50 122 risk of developing mild cognitive impairment (MCI) in  
51  
52  
53 123 cognitively normal elderly people<sup>[7]</sup> .

54  
55 124 Exposure to secondhand smoke (SHS), also known as  
56  
57  
58 125 "passive smoking," refers to a situation where a never-  
59  
60  
126 smoker inhales another person's smoke either by exposure

1  
2  
3  
4 127 to sidestream smoke or mainstream smoke <sup>[8]</sup>. Current smoking  
5  
6 128 prevalence in China decreased from 31.1% in 2002 to 28.1%  
7  
8  
9 129 in 2010; however, the number of adults exposed to SHS during  
10  
11 130 this period still increased from 540 million to 556 million  
12  
13  
14 131 <sup>[2]</sup>. The negative health effects of high levels of exposure  
15  
16  
17 132 to SHS may be close to those of active smoking, including  
18  
19  
20 133 inferior performance on measures of general intelligence,  
21  
22 134 visuospatial learning and memory and fine motor dexterity<sup>[9]</sup>  
23  
24  
25 135 . Given the association between exposure to SHS and risk  
26  
27 136 factors for cognitive impairment such as cardiovascular  
28  
29  
30 137 disease<sup>[10]</sup> , hypertension<sup>[11]</sup> , and stroke <sup>[12]</sup> , it is possible  
31  
32  
33 138 that high level of exposure may be a preventable risk factor  
34  
35 139 for cognitive impairment or dementia <sup>[11, 13]</sup> .

36  
37  
38 140 There are some evidence to suggest that older current  
39  
40 141 smokers (ages  $\geq 63$ ) <sup>[14]</sup> or those being exposed to SHS (aged  
41  
42  
43 142 55-64) <sup>[13-16]</sup> were more likely to develop cognitive  
44  
45  
46 143 impairment compared with never-smokers. However, much less  
47  
48  
49 144 is known about whether and to what extent SHS is associated  
50  
51 145 with global and subdomains of cognitive function among  
52  
53 146 elder women in China. Previous studies in China indicated  
54  
55  
56 147 that SHS exposure increased the risk of cognitive  
57  
58  
59 148 impairment in older adults<sup>[17, 18]</sup>. Nevertheless, both of  
60

1  
2  
3  
4 149 these studies only used a 2-wave longitudinal data and did  
5  
6 150 not control for baseline cognition<sup>[17, 18]</sup>. Therefore, the  
7  
8  
9 151 primary aim of this study was to investigate the  
10  
11 152 relationship between SHS and cognitive function among older  
12  
13  
14 153 non-smoking Chinese women, using a 3-wave longitudinal  
15  
16  
17 154 national representative data. Through the classification  
18  
19 155 of respondents by different years of SHS exposure in a 4-  
20  
21  
22 156 year panel, we identified whether certain high SHS exposure  
23  
24  
25 157 groups were at higher risk of cognitive decline than others  
26  
27 158 after controlling for confounders. Besides, we aimed to  
28  
29  
30 159 examine the association between SHS exposure and cognitive  
31  
32  
33 160 subdomains. This is especially important given the  
34  
35 161 escalating ageing trend and increasing prevalence of SHS  
36  
37  
38 162 exposure in China.

## 163 **Methods**

### 164 **Data**

165 CHARLS had passed the ethical review before field investigation and we used data  
166 from 3 waves of the China Health and Retirement Longitudinal Study (CHARLS,2011-  
167 2013-2015), which was publicly available at <http://charls.pku.edu.cn>. CHARLS  
168 involved participants with a nationally representative  
169 survey of adults aged 45 years or older, as well as their  
170 spouses when possible, and included assessments of social,

---

1  
2  
3  
4 171 economic, and health circumstances of community-residents.  
5  
6 172 The national baseline survey was conducted between June  
7  
8  
9 173 2011 and March 2012 and samples were chosen through  
10  
11  
12 174 multistage probability sampling. After excluding empty or  
13  
14 175 non-resident dwellings, final interviews were conducted on  
15  
16  
17 176 17,708 respondents from 10,257 households, which completed  
18  
19  
20 177 at least one module of the survey beyond the cover screening  
21  
22 178 for age eligibility. CHARLS respondents were followed every  
23  
24  
25 179 2 years, using a face-to-face computer-assisted personal  
26  
27 180 interview (CAPI) <sup>[14]</sup>. At baseline, there were 3381 married  
28  
29  
30 181 women who never smoked cigarettes and lived with spouses  
31  
32  
33 182 who had either smoked cigarettes in the past or smoked at  
34  
35 183 the time of interview. Besides, all the data for each  
36  
37  
38 184 variable have been collected for those respondents. Our  
39  
40 185 final sample was composed of 6875 respondents. Among them,  
41  
42  
43 186 2802 were interviewed again during the second wave of data  
44  
45  
46 187 collection in 2013, and 2247 were interviewed again during  
47  
48 188 the third wave in 2015. The similar sample selection  
49  
50  
51 189 process was conducted for participants in the second wave  
52  
53 190 in 2013 as a baseline. The final sample consisted of 1799  
54  
55  
56 191 women who were investigated again in 2015 as participants.

## 192 **Measures**

---

1  
2  
3  
4 193 ***Secondhand Smoke***  
5

6 194 In this study, the exposure to SHS among Chinese women  
7  
8  
9 195 was assessed through several surveys based on standardized  
10  
11 196 CHARLS questionnaire. Questions about the participant's  
12  
13  
14 197 current marital status, the exact year they got married,  
15  
16  
17 198 and the year the husband in each household has begun or  
18  
19 199 ceased smoking at home were asked.  
20  
21

22 200 The smoking status section contained four questions:  
23  
24 201 "Have you ever chewed tobacco, smoked a pipe, smoked self-  
25  
26 202 rolled cigarettes, or smoked cigarettes/cigars?", "Do you  
27  
28 203 still have the habit or have you totally quit?", "At what  
29  
30 204 age did you totally quit smoking?" and "At what age did you  
31  
32 205 start to smoke on a regular basis?". If the answer to the  
33  
34 206 first question was "yes", they were defined as "current  
35  
36 207 smokers". Our analysis of SHS exposure focused only on  
37  
38 208 never smokers excluding the "current smokers", because of  
39  
40 209 the difficulty to differentiate the negative effects of  
41  
42 210 active smoking on health condition from that of SHS  
43  
44 211 exposure. The length of SHS exposure was calculated and  
45  
46 212 expressed as the total number of years that never-smoking  
47  
48 213 women spent living with their spouses who smoked cigarettes  
49  
50 214 at home.  
51  
52  
53  
54  
55  
56  
57  
58  
59  
60

---

215 Since the impact of SHS might be neglected if we only  
216 used a continuous variable to represent exposure; moreover,  
217 compared with continuous variables, the use of categorical  
218 variables has greater public health significance. Based on  
219 the constructed SHS exposure variable, the participants  
220 were classified into four different groups: Never or being  
221 exposed to SHS for less than 25 years, more than 25 years  
222 and less than 30 years, more than 30 years and less than  
223 40 years and over 40 years.

#### 224 ***Cognitive function***

225 The cognitive function of the respondents in CHARLS  
226 questionnaires was measured through a question-and-answer  
227 interview instrument, and the respondents were followed  
228 every two years using a face-to-face, computer-aided  
229 personal interview (CAPI). These various sections of the questionnaire  
230 could assess cognitive subdomains including visuospatial ability, orientation and  
231 attention, and episodic memory. Figure drawing was tested by asking the participants  
232 to reproduce a picture of two overlapped pentagons in CHARLS questionnaires<sup>[18]</sup>. It  
233 was used to measure a person's ability to identify visual and spatial relationships among  
234 objects. The Telephone Interview of Cognitive Status (TICS)  
235 was a screening test, including serial subtractions of 7  
236 from 100 (up to 5 times), date (month, day, and year and



1  
2  
3  
4 237 season), and the day of the week. In order to assess orientation and  
5  
6 238 attention function, the number of correct answers to the above questions in TICS was  
7  
8  
9 239 scored and summed up (range 0 to 10). Participants who successfully completed the  
10  
11 240 task received a score of 1, and those who failed received 0<sup>[19]</sup>.

12  
13  
14 241 In addition, the word recall test was consisted of 2  
15  
16 242 components, immediate recall and delayed recall, and  
17  
18 243 evaluated episodic memory. Participants were required to  
19  
20 244 repeat 10 Chinese nouns just read to them immediately, and  
21  
22 245 after 20 questions concerning Center for Epidemiologic  
23  
24 246 Studies Depression Scale (CES-D, approximately 4 to 10  
25  
26 247 minutes), they were again asked to recall as many of the  
27  
28 248 original words as possible. The item was coded as 1 if  
29  
30 249 recalled by the respondent, and as 0 if not. Scores for  
31  
32 250 immediate and delayed recall both varied from 0 to 10. An  
33  
34 251 evaluated episodic memory score was calculated using the  
35  
36 252 mean of scores in immediate and delayed word recall (range  
37  
38 253 0 to 10)<sup>[19]</sup>.

39  
40 254 The overall cognition scores were the sum of the three  
41  
42 255 different domains (range 0 to 21).

### 256 ***Control variables***

257 Given that cognitive function may vary across  
258 demographic and socioeconomic status, we thus included age,  
259  
260

---

259 urban/rural residence, education, annual household  
260 expenditures, chronic diseases and depressive symptoms as  
261 control variables. Education was categorized into 3 groups:  
262 "illiterate", "primary education" and "secondary education  
263 or above". Arterial hypertension and diabetes mellitus are  
264 separately strong independent risk factors for the  
265 development of cognitive impairment and dementia<sup>[20]</sup> <sup>[21]</sup>.  
266 Thus, the baseline chronic disease of hypertension and  
267 diabetes were classified as three types based on self-  
268 reported conditions on whether the participants were being  
269 treated: having hypertension/diabetes with treatment,  
270 having hypertension/diabetes without treatment and not  
271 having hypertension/diabetes. The measure of depressive  
272 symptoms was based on the 10-item version of the CES-D  
273 short form, and each of the 4-option response to the item  
274 was scored ranging from 0 to 3. The total score is the sum  
275 of points for all 10 items, and a score of 10 or higher  
276 suggests the presence of depressive symptoms <sup>[6]</sup>.

277

### 278 ***Patient and Public Involvement***

279 No patient involved.

### 280 **Analysis**

---

1  
2  
3  
4 281 All analyses were conducted with STATA, version 14.0  
5  
6 282 (Stata, College Station, TX, USA). The lagged dependent-  
7  
8  
9 283 variable regression models with ordinary least squares  
10  
11 284 estimation were used during analysis. LDV models were  
12  
13  
14 285 superior for analyzing the effects of predictor variables  
15  
16  
17 286 on an outcome with 2-wave panel data while controlling for  
18  
19 287 the influence of time-invariant variables<sup>[22]</sup>. It adjusted  
20  
21  
22 288 for baseline cognitive conditions for all participants,  
23  
24  
25 289 therefore provided more robust estimates of the effects of  
26  
27 290 independent variables. After pooling the three sets of  
28  
29  
30 291 panel data into one through using the "year" dummy variable  
31  
32  
33 292 to differentiate between a change in 2 years or in 4 years,  
34  
35 293 we have 6875 respondents who have complete data on all  
36  
37 294 variables. The overall cognitive scores, episodic memory  
38  
39 295 scores, visuospatial ability scores and orientation and  
40  
41 296 attention scores were 4 separate outcome variables. The  
42  
43 297 different groups of SHS exposure years were the predictor  
44  
45 298 variable, and other independent variables included all  
46  
47 299 demographic and socioeconomic characteristics. Prior to  
48  
49 300 fitting the regression models, descriptive analyses were  
50  
51 301 conducted to estimate the mean and standard deviations for  
52  
53 302 continuous data and frequencies and percentages for  
54  
55  
56  
57  
58  
59  
60

1  
2  
3  
4 303 categorical data.  
5  
6 304

7  
8 305 **Results**  
9

10 306 Table 1 provides a descriptive summary of all the  
11  
12 307 variables for participants from each panel of three  
13  
14 308 different waves: 2011-2013, 2011-2015 and 2013-2015. High  
15  
16 309 prevalence of SHS exposure between 30 to 40 years was seen  
17  
18 310 in different panels, accounting for 32.51%, 35.18% and  
19  
20 311 42.69% respectively.  
21  
22  
23  
24  
25

26 312 The participants were over 45 years old, with the mean  
27  
28 313 age of 56, 56 and 58 years old, respectively in those waves.  
29  
30 314 Participants were more likely to live in a rural area, have  
31  
32 315 a lower education background and do not have hypertension  
33  
34 316 or diabetes diagnoses at baseline. In addition, our results  
35  
36 317 indicated that the mean baseline cognition scores were  
37  
38 318 higher than cognition scores after 2 or 4 years. The mean  
39  
40 319 scores of CES-D suggested that the prevalence of depression  
41  
42 320 among Chinese middle-aged and old-aged women was increased  
43  
44 321 in those years. Other socio-demographic characteristics of  
45  
46 322 the respondents are shown in Table 1  
47  
48  
49  
50  
51  
52

53  
54 323 Results from the regression models for the  
55  
56 324 relationship between SHS exposure and each domain of the  
57  
58 325 cognitive function and overall cognition scores are  
59  
60

1  
2  
3  
4 326 reported in Table 2 and Table 3. Scores of episodic  
5  
6 327 memory, orientation and attention and visuospatial among  
7  
8  
9 328 respondents at baseline were strong predictors of their  
10  
11 329 corresponding cognitive function measures after 2 or 4  
12  
13  
14 330 years. Based on the analysis adjusted for age, annual  
15  
16  
17 331 household expenditure, education, baseline cognitive  
18  
19 332 function and another chronic health status, we found that  
20  
21  
22 333 only being exposed to SHS for more than 40 years was  
23  
24  
25 334 significantly associated with a decline in visuospatial  
26  
27 335 abilities, episodic memory and overall cognition scores  
28  
29  
30 336 for all respondents. Compared with respondents who were  
31  
32  
33 337 not exposed to SHS or exposed to it for less than 25  
34  
35  
36 338 years, those who have been exposed to SHS for more than  
37  
38 339 40 years was associated with a 0.04-point decline in  
39  
40 340 visuospatial abilities (95%CI, -0.08 to -0.01 P <0.1), a  
41  
42 341 0.16-point decline in episodic memory (95%CI, -0.31 to -  
43  
44 342 0.01 P <0.05), and a 0.33-point decline in overall  
45  
46  
47 343 cognition function (95%CI, -0.66 to -0.01 P <0.01). In  
48  
49  
50 344 addition, age was also negatively associated with  
51  
52  
53 345 cognitive function. Each one-year older was associated  
54  
55  
56 346 with 0.01-point, 0.01-point, 0.03-point, and 0.05-point  
57  
58  
59 347 decrease in visuospatial (95%CI, -0.01 to -0.00 P <0.01),  
60

---

1  
2  
3  
4 348 orientation (95%CI, -0.03 to -0.01 P <0.01), memory  
5  
6 349 (95%CI, -0.31 to -0.01 P <0.05) and overall cognition  
7  
8  
9 350 scores (95%CI, -0.66 to -0.01 P <0.01), respectively.  
10  
11 351 High education level was associated with better cognitive  
12  
13  
14 352 performance, especially in orientation and attention. In  
15  
16  
17 353 addition, a one-point increase in CESD scores was  
18  
19 354 associated with 0.02-point decrease in scores of  
20  
21  
22 355 orientation and attention (95%CI, -0.03 to 0.00 P <0.05),  
23  
24  
25 356 showing that respondents with depressive symptoms were  
26  
27 357 more likely to demonstrate a cognitive decline in  
28  
29  
30 358 specific functions.

### 359 **Discussion**

360 Results from this longitudinal study with a large,  
361 representative sample of middle-aged and older women in  
362 China indicated that exposure to SHS for over 40 years was  
363 significantly associated with the more unsatisfactory  
364 performance of global cognition and cognitive subdomains.  
365 It is the first examination of cognitive subdomains  
366 concerning household SHS exposure using a 4-year  
367 longitudinal data in China. The inferior performance of SHS  
368 on visuospatial abilities, episodic memory and orientation  
369 and attention abilities are novel. Because these domains

---

1  
2  
3  
4 370 were not specifically evaluated in earlier studies among  
5  
6 371 middle-aged and older women who never smoke. In addition  
7  
8  
9 372 to the previous findings that SHS was associated with poor  
10  
11 373 cognitive performance, especially in children, adolescents  
12  
13  
14 374 and adults <sup>[18]</sup>. We found that having a high educational  
15  
16 375 level, living in an urban area and having better baseline  
17  
18 376 cognitive function would improve their cognitive  
19  
20 377 performance. The episodic memory score of participants with  
21  
22 378 diabetes at baseline decreased by 0.172 points compared  
23  
24 379 with those without diabetes, which is similar to previous  
25  
26 380 findings<sup>[9]</sup>.

31  
32 381 Moreover, our results showed that compared with women  
33  
34 382 who have never been exposed to SHS or have been exposed for  
35  
36 383 less than 20 years, those who have been exposed to SHS for  
37  
38 384 more than 40 years have a significant decline in  
39  
40 385 visuospatial function (0.04-point), episodic memory (0.16-  
41  
42 386 point) and overall cognitive scores (0.33-point). These  
43  
44 387 findings were quite similar in magnitude to prior research  
45  
46 388 on the relationship between SHS and cognitive function <sup>[14]</sup>.  
47  
48 389 Moheet and colleagues (2015) conducted a cross-sectional  
49  
50 390 study in the North East of England to explore the impact  
51  
52 391 of diabetes on cognitive function and brain structure  
53  
54  
55  
56  
57  
58  
59  
60

1  
2  
3  
4 392 (N=150). Research suggested that compared with non-exposed  
5  
6 393 people, participants who had no history of smoking and  
7  
8  
9 394 being averagely exposed to SHS for around 6 years showed  
10  
11 395 significantly reduced performance in processing speed (i.e.  
12  
13  
14 396 how quickly one can process information and perform tasks)  
15  
16  
17 397 and executive function (i.e. the ability to organize memory,  
18  
19 398 cognitive flexibility, and problem-solving ability)<sup>[22]</sup>.  
20  
21  
22 399 Another longitudinal ageing study in China (N=4809, ages  
23  
24 400 ≥50) found that never smokers exposed to the highest levels  
25  
26  
27 401 of SHS (salivary cotinine concentrations 0.8-13.5 ng/ml)  
28  
29  
30 402 were more likely to be cognitively impaired (odds ratio  
31  
32 403 =1.70) than those exposed to little or no SHS<sup>[18]</sup>.

35 404 Attention referred to the ability to concentrate and  
36  
37 405 focus on specific stimuli slightly declined in later life  
38  
39  
40 406 <sup>[13]</sup>. Orientation was one's ability to identify the exact  
41  
42  
43 407 date, month, day and season of the year<sup>[23]</sup>. Our results  
44  
45  
46 408 suggested that for each one-year increase in age, there  
47  
48 409 were additional 0.01-point, 0.02-point, 0.04-point and  
49  
50  
51 410 0.06-point decline in visuospatial, orientation, memory and  
52  
53 411 overall cognition scores, respectively. SHS seems to be  
54  
55  
56 412 more strongly associated with cognitive decline than ageing,  
57  
58 413 since the magnitude of significant coefficient between  
59  
60



1  
2  
3  
4 414 SHS and cognitive decline was almost four times the one in  
5  
6 415 ageing. However, the relationship between SHS and  
7  
8  
9 416 orientation and attention ability was not observed. This  
10  
11 417 may due to the size of the sample is relatively small, plus  
12  
13  
14 418 the period of cohort study after controlling for all  
15  
16  
17 419 demographic and socioeconomic confounders is relatively  
18  
19  
20 420 short.

21  
22 421 Visuospatial abilities involve the ability to understand  
23  
24 422 space in two and three dimensions. In our study, an inversed  
25  
26  
27 423 relationship between SHS exposure and visuospatial  
28  
29  
30 424 abilities among middle-aged and older adults was presented,  
31  
32 425 showing a 0.04-point decline in their visuospatial scores.  
33  
34  
35 426 Such an inversed relationship between SHS exposure and  
36  
37  
38 427 visuospatial reasoning skills was also reported among  
39  
40 428 American children (N=5683; ages 6-16), showing that years  
41  
42  
43 429 of SHS exposure was significantly associated with lower  
44  
45  
46 430 scores for reading, math, and visuospatial skills, after  
47  
48 431 adjusting for covariates <sup>[15]</sup>. As one of the most common  
49  
50  
51 432 cognitive complaints among elders, episodic memory refers  
52  
53 433 to personally experienced events which could be measured  
54  
55  
56 434 by stories, word lists or figures. Previous research has  
57  
58 435 indicated that the onset of memory decline may vary among  
59  
60

1  
2  
3  
4 436 different memory types, with episodic memory decline  
5  
6 437 possibly being lifelong [24]. Our study could not explore  
7  
8  
9 438 the onset age of memory decline without doing regression  
10  
11 439 among different age groups. The significant coefficient  
12  
13  
14 440 could indicate memory decline associated with SHS exposure.

15  
16  
17 441 The inconsistent conclusions between our studies and  
18  
19 442 prior ones may probably due to the relatively simplified  
20  
21  
22 443 version of the cognition test procedure in CHARLS  
23  
24  
25 444 questionnaires compared with the MoCA [14] and MMSE [25]. Some  
26  
27 445 studies also used clinical or magnetic resonance imaging  
28  
29  
30 446 (MRI) evidence of neurologic damage to detect cognitive  
31  
32  
33 447 impairment. Best adapted to a screening test, the MoCA  
34  
35 448 exhibited excellent sensitivity in identifying MCI and AD  
36  
37  
38 449 (Alzheimer's disease) by 90% and 100%, respectively [26].

39  
40 450 The most popular hypothesis about the mechanisms  
41  
42  
43 451 underlying the links between SHS exposure and more  
44  
45  
46 452 unsatisfactory cognitive performance lies in the notion  
47  
48  
49 453 that the carbon monoxide (CO) in tobacco smoke may  
50  
51  
52 454 interfere with the oxygen being delivered to the brain via  
53  
54  
55 455 the blood system. However, the reasons behind the  
56  
57  
58 456 different effect on various domains of brain function are  
59  
60 457 far from clear. One possible explanation derives from

1  
2  
3  
4 458 research on laboratory animals. Exposing animals to  
5  
6 459 varying degrees of toxic mixtures of chemicals found in  
7  
8  
9 460 tobacco smoke may lead to reduced neuronal mass in specific  
10  
11 461 regions of the brain associated with learning and memory.  
12  
13  
14 462 Since the hippocampal region of the brain is known to be  
15  
16 463 involved in the mediation of memory [27] and learning,  
17  
18 464 further research should be conducted in other regions  
19  
20 465 dominating visuospatial and orientation ability. Another  
21  
22 466 possible mechanism is that prolonged exposure to SHS may  
23  
24 467 be a significant risk factor for cardiovascular disease  
25  
26 468 (CVD) [28], which may therefore lead to a range of health  
27  
28 469 and cognitive problems in later life. In the future, a  
29  
30 470 longitudinal design may elucidate any associations by  
31  
32 471 observing long-term exposure to SHS and the incidence of  
33  
34 472 CVD, and whether this CVD may mediate or interact with SHS  
35  
36 473 exposure to impact cognitive function.  
37  
38 474 Several limitations need to be considered when interpreting  
39  
40 475 this study and designing future studies. Firstly, exposure  
41  
42 476 to SHS was evaluated based on self-report measures. This  
43  
44 477 might be subject to recall bias and lead to over-or-  
45  
46 478 underestimation of exposure [29]. Therefore, further studies  
47  
48 479 could include more biological assays, for example, cotinine  
49  
50  
51  
52  
53  
54  
55  
56  
57  
58  
59  
60

1  
2  
3  
4 480 residue levels or nicotine residue in saliva or hair  
5  
6 481 samples <sup>[30]</sup>. Previous research using serum cotinine as a  
7  
8  
9 482 biomarker of exposure to SHS found that higher levels of  
10  
11 483 serum cotinine were associated with significantly worse  
12  
13  
14 484 performance in reading, mathematics, and visual and spatial  
15  
16  
17 485 abilities in children and adolescents <sup>[8]</sup>. However, no  
18  
19 486 studies had used a combination of biomarker and self-report  
20  
21  
22 487 yet <sup>[31]</sup>. Some validated biomarkers could be used as proxies  
23  
24  
25 488 for AD neuropathological changes, such as cerebrospinal  
26  
27 489 fluid (CSF) amyloid-beta (A $\beta$ )42 concentrations or A $\beta$ 42/  
28  
29  
30 490 A $\beta$ 40 ratio and amyloid load on positron emission tomography  
31  
32  
33 491 (PET) scans. These biomarkers could provide more reliable  
34  
35 492 measures of cognitive impairment<sup>[32]</sup>. Secondly, it may be  
36  
37  
38 493 impossible to control for all potentially confounding  
39  
40  
41 494 variables. After adjusting for age, household expenditure,  
42  
43 495 education, area, chronic health condition and depressive  
44  
45  
46 496 symptoms, some other demographic or socioeconomic  
47  
48  
49 497 confounders may be neglected. However, this did not appear  
50  
51  
52 498 to affect the magnitude of the association between SHS  
53  
54 499 exposure and cognition <sup>[14]</sup>. Besides, the analyses only  
55  
56 500 contained household SHS exposure, which precluded the  
57  
58  
59 501 analyses of the influence of environment smoke inhale on  
60

1  
2  
3  
4 502 smoking proclivity. Whether exposure to household SHS can  
5  
6 503 hasten the onset of cognitive impairment for older Chinese  
7  
8  
9 504 women could be further proved by running regression models  
10  
11  
12 505 in different age groups.

#### 13 14 506 **Acknowledgments :**

15  
16  
17 507 We would like to thank the professor Yaohui Zhao at Centre for Chinese Economic  
18  
19 508 Research, Peking University for her thoughtful contributions to this study.

#### 20 21 22 509 **Conflict of Interest**

23  
24  
25 510 The authors have no conflicts of interest to declare.

#### 26 27 511 **Author's Contribution**

28  
29  
30 512 Anying Bai wrote and participated in all aspects of this research, including the field  
31  
32 513 investigation. Dr Yangmu Huang reviewed and supervised this research. Yinzi Jin  
33  
34  
35 514 participated in the statistical analysis of this work and reviewed the final article.

#### 36 37 515 **Data sharing statement**

38  
39  
40 516 CHARLS data is available to the public online: <http://charls.pku.edu.cn>

#### 41 42 43 517 **Funding Resources**

44  
45 518 This is a self-funded research.

46  
47 519

#### 48 49 520 **Reference**

50  
51 521

52 522 1 Fang EF, Scheibye-Knudsen M, Jahn HJ, et al. A research agenda for aging in China in the  
53  
54 523 21st century. *Ageing research reviews* 2015;24(Pt B):197-205. doi:

55  
56  
57 524 10.1016/j.arr.2015.08.003 [published Online First: 2015/08/26]

58  
59  
60 525 2 Harada CN, Natelson Love MC, Triebel KL. Normal Cognitive Aging. *Clinics in Geriatric*

- 
- 1  
2  
3  
4 526 *Medicine* 2013;29(4):737-52. doi: 10.1016/j.cger.2013.07.002  
5  
6  
7 527 3 Robertson DA, Savva GM, Kenny RA. Frailty and cognitive impairment--a review of the  
8  
9 528 evidence and causal mechanisms. *Ageing Res Rev* 2013;12(4):840-51. doi:  
10 529 10.1016/j.arr.2013.06.004 [published Online First: 2013/07/09]  
11  
12  
13  
14 530 4 Yin P, Ma Q, Wang L, et al. Chronic obstructive pulmonary disease and cognitive  
15  
16 531 impairment in the Chinese elderly population: a large national survey. *International*  
17  
18 532 *Journal of Chronic Obstructive Pulmonary Disease* 2016 doi: 10.2147/ncopd.S96237  
19  
20  
21  
22 533 5 Bernardin F, Maheut-Bosser A, Paille Fo. Cognitive Impairments in Alcohol-Dependent  
23  
24 534 Subjects. *Frontiers in Psychiatry* 2014;5 doi: 10.3389/fpsy.2014.00078  
25  
26  
27 535 6 Tadic M, Cuspidi C, Hering D. Hypertension and cognitive dysfunction in elderly: blood  
28  
29 536 pressure management for this global burden. *BMC Cardiovasc Disord*  
30  
31 537 2016;16(1):208. doi: 10.1186/s12872-016-0386-0 [published Online First:  
32  
33 538 2016/11/05]  
34  
35  
36  
37 539 7 Modrego PJ, Ferrández J. Depression in Patients With Mild Cognitive Impairment Increases  
38  
39 540 the Risk of Developing Dementia of Alzheimer Type: A Prospective Cohort Study.  
40  
41 541 *Archives of Neurology* 2004;61(8):1290-93. doi: 10.1001/archneur.61.8.1290  
42  
43  
44  
45 542 8 Ling J, Heffernan T. The Cognitive Deficits Associated with Second-Hand Smoking.  
46  
47 543 *Frontiers in Psychiatry* 2016;7 doi: 10.3389/fpsy.2016.00046  
48  
49  
50  
51 544 9 Durazzo TC, Meyerhoff DJ, Nixon SJ. A comprehensive assessment of neurocognition in  
52  
53 545 middle-aged chronic cigarette smokers. *Drug Alcohol Depend* 2012;122(1-2):105-11.  
54  
55 546 doi: 10.1016/j.drugalcdep.2011.09.019 [published Online First: 2011/10/14]  
56  
57  
58 547 10 Teo KK, Ounpuu S, Hawken S, et al. Tobacco use and risk of myocardial infarction in 52  
59  
60

- 
- 1  
2  
3  
4 548 countries in the INTERHEART study: a case-control study. *Lancet (London, England)*  
5  
6 549 2006;368(9536):647-58. doi: 10.1016/s0140-6736(06)69249-0 [published Online  
7  
8  
9 550 First: 2006/08/22]  
10  
11 551 11 Kim BJ, Kang JG, Kim JH, et al. Association between Secondhand Smoke Exposure and  
12  
13  
14 552 Hypertension in 106,268 Korean Self-Reported Never-Smokers Verified by Cotinine.  
15  
16  
17 553 *Journal of clinical medicine* 2019;8(8) doi: 10.3390/jcm8081238 [published Online  
18  
19  
20 554 First: 2019/08/21]  
21  
22 555 12 Teo KK, Ounpuu S, Hawken S, et al. Tobacco use and risk of myocardial infarction in 52  
23  
24  
25 556 countries in the INTERHEART study: a case-control study. *The Lancet*  
26  
27 557 2006;368(9536):647-58. doi: 10.1016/s0140-6736(06)69249-0  
28  
29  
30 558 13 Heffernan TM, O'Neill TS. Everyday prospective memory and executive function deficits  
31  
32  
33 559 associated with exposure to second-hand smoke. *Journal of addiction*  
34  
35 560 2013;2013:160486. doi: 10.1155/2013/160486 [published Online First: 2013/01/01]  
36  
37  
38 561 14 Yolton K, Dietrich K, Auinger P, et al. Exposure to environmental tobacco smoke and  
39  
40  
41 562 cognitive abilities among U.S. children and adolescents. *Environ Health Perspect*  
42  
43 563 2005;113(1):98-103. doi: 10.1289/ehp.7210 [published Online First: 2005/01/01]  
44  
45  
46 564 15 Llewellyn DJ, Lang IA, Langa KM, et al. Exposure to secondhand smoke and cognitive  
47  
48  
49 565 impairment in non-smokers: national cross sectional study with cotinine  
50  
51 566 measurement. *Bmj* 2009;338(feb12 2):b462-b62. doi: 10.1136/bmj.b462  
52  
53  
54 567 16 Malek AM, Cushman M, Lackland DT, et al. Secondhand Smoke Exposure and Stroke:  
55  
56  
57 568 The Reasons for Geographic and Racial Differences in Stroke (REGARDS) Study.  
58  
59 569 *American journal of preventive medicine* 2015;49(6):e89-97. doi:  
60

- 
- 1  
2  
3  
4 570 10.1016/j.amepre.2015.04.014 [published Online First: 2015/06/29]  
5  
6  
7 571 17 He F, Li T, Lin J, et al. Passive Smoking Exposure in Living Environments Reduces  
8  
9 572 Cognitive Function: A Prospective Cohort Study in Older Adults. *International journal*  
10  
11 573 *of environmental research and public health* 2020;17(4) doi: 10.3390/ijerph17041402  
12  
13  
14 574 [published Online First: 2020/02/27]  
15  
16  
17 575 18 Pan X, Luo Y, Roberts AR. Secondhand Smoke and Women's Cognitive Function in  
18  
19 576 China. *American Journal of Epidemiology* 2018;187(5):911-18. doi:  
20  
21 577 10.1093/aje/kwx377  
22  
23  
24 578 19 Zhao Y, Hu Y, Smith JP, et al. Cohort Profile: The China Health and Retirement  
25  
26  
27 579 Longitudinal Study (CHARLS). *International Journal of Epidemiology* 2012;43(1):61-  
28  
29 580 68. doi: 10.1093/ije/dys203  
30  
31  
32 581 20 Ge S, Wei Z, Liu T, et al. Alcohol Use and Cognitive Functioning Among Middle-Aged and  
33  
34  
35 582 Older Adults in China: Findings of the China Health and Retirement Longitudinal  
36  
37 583 Study Baseline Survey. *Alcohol Clin Exp Res* 2018;42(10):2054-60. doi:  
38  
39 584 10.1111/acer.13861 [published Online First: 2018/08/07]  
40  
41  
42 585 21 Li J, Cacchione PZ, Hodgson N, et al. Afternoon Napping and Cognition in Chinese Older  
43  
44  
45 586 Adults: Findings from the China Health and Retirement Longitudinal Study Baseline  
46  
47 587 Assessment. *J Am Geriatr Soc* 2017;65(2):373-80. doi: 10.1111/jgs.14368 [published  
48  
49 588 Online First: 2016/12/21]  
50  
51  
52 589 22 Moheet A, Mangia S, Seaquist ER. Impact of diabetes on cognitive function and brain  
53  
54  
55 590 structure. *Annals of the New York Academy of Sciences* 2015;1353(1):60-71. doi:  
56  
57 591 10.1111/nyas.12807  
58  
59  
60



- 1  
2  
3  
4 592 23 Peters-Founshtein G, Peer M, Rein Y, et al. Mental-orientation: A new approach to  
5  
6 593 assessing patients across the Alzheimer's disease spectrum. *Neuropsychology*  
7  
8  
9 594 2018;32(6):690-99. doi: 10.1037/neu0000463 [published Online First: 2018/05/22]  
10  
11 595 24 Burk JA, Blumenthal SA, Maness EB. Neuropharmacology of attention. *European journal*  
12  
13  
14 596 *of pharmacology* 2018;835:162-68. doi: 10.1016/j.ejphar.2018.08.008 [published  
15  
16  
17 597 Online First: 2018/08/10]  
18  
19 598 25 Lövdén M, Rönnlund M, Wahlin A, et al. The extent of stability and change in episodic and  
20  
21  
22 599 semantic memory in old age: demographic predictors of level and change. *The*  
23  
24 600 *journals of gerontology Series B, Psychological sciences and social sciences*  
25  
26  
27 601 2004;59(3):P130-4. doi: 10.1093/geronb/59.3.p130 [published Online First:  
28  
29  
30 602 2004/05/01]  
31  
32 603 26 Li X, Jia S, Zhou Z, et al. The role of the Montreal Cognitive Assessment (MoCA) and its  
33  
34  
35 604 memory tasks for detecting mild cognitive impairment. *Neurol Sci* 2018;39(6):1029-  
36  
37  
38 605 34. doi: 10.1007/s10072-018-3319-0 [published Online First: 2018/03/20]  
39  
40 606 27 Trzepacz PT, Hochstetler H, Wang S, et al. Relationship between the Montreal Cognitive  
41  
42  
43 607 Assessment and Mini-mental State Examination for assessment of mild cognitive  
44  
45  
46 608 impairment in older adults. *BMC Geriatr* 2015;15(107):107. doi: 10.1186/s12877-015-  
47  
48  
49 609 0103-3 [published Online First: 2015/09/09]  
50  
51 610 28 Ziad S, Nasreddine M. The Montreal Cognitive Assessment (MoCA)- Concept and Clinical  
52  
53  
54 611 Review. *the American Geriatrics Society* 2005;53(4):695-99.  
55  
56 612 29 Staples MC, Mandyam CD. Thinking after Drinking: Impaired Hippocampal-Dependent  
57  
58  
59 613 Cognition in Human Alcoholics and Animal Models of Alcohol Dependence. *Frontiers*  
60

- 
- 1  
2  
3  
4 614 *in Psychiatry* 2016;7 doi: 10.3389/fpsyt.2016.00162
- 5  
6 615 30 Yankelevitz DF, Henschke CI, Yip R, et al. Second-Hand Tobacco Smoke in Never  
7  
8  
9 616 Smokers Is a Significant Risk Factor for Coronary Artery Calcification. *JACC:*  
10  
11 617 *Cardiovascular Imaging* 2013;6(6):651-57. doi: 10.1016/j.jcmg.2013.02.004
- 12  
13  
14 618 31 Akhtar WZ, Andresen EM, Cannell MB, et al. Association of blood cotinine level with  
15  
16  
17 619 cognitive and physical performance in non-smoking older adults. *Environmental*  
18  
19 620 *Research* 2013;121:64-70. doi: 10.1016/j.envres.2012.10.013
- 20  
21  
22 621 32 Banning LCP, Ramakers I, Deckers K, et al. Affective symptoms and AT(N) biomarkers in  
23  
24  
25 622 mild cognitive impairment and Alzheimer's disease: A systematic literature review.  
26  
27 623 *Neuroscience and biobehavioral reviews* 2019;107:346-59. doi:  
28  
29  
30 624 10.1016/j.neubiorev.2019.09.014 [published Online First: 2019/09/17]
- 31  
32 625  
33  
34 626  
35  
36 627  
37  
38  
39 628  
40  
41  
42 629  
43  
44  
45  
46  
47  
48  
49  
50  
51  
52  
53  
54  
55  
56  
57  
58  
59  
60

Table 1. Characteristics of the Participants from 3 waves of CHARLS, 2011-2013-2015

| Variable                                  | 2011-2013<br>(N=2802) |           | 2011-2015<br>(N=2274) |           | 2013-2015<br>(N=1799) |           |
|-------------------------------------------|-----------------------|-----------|-----------------------|-----------|-----------------------|-----------|
|                                           | Count                 | Frequency | Count                 | Frequency | Count                 | Frequency |
| <b>Area</b>                               |                       |           |                       |           |                       |           |
| Urban                                     | 981                   | 35.01%    | 730                   | 32.10%    | 556                   | 30.91%    |
| Rural                                     | 1821                  | 64.99%    | 1544                  | 67.90%    | 1243                  | 69.09%    |
| <b>SHS</b>                                |                       |           |                       |           |                       |           |
| Less than 25 years                        | 759                   | 27.09%    | 531                   | 23.35%    | 262                   | 14.56%    |
| More than 25 years and less than 30 years | 634                   | 22.63%    | 573                   | 25.20%    | 385                   | 21.40%    |
| More than 30 years and less than 40 years | 911                   | 32.51%    | 800                   | 35.18%    | 768                   | 42.69%    |
| More than 40 years                        | 498                   | 17.77%    | 370                   | 16.27%    | 384                   | 21.35%    |
| <b>Education</b>                          |                       |           |                       |           |                       |           |
| Illiterate                                | 1552                  | 55.39%    | 1309                  | 57.56%    | 1004                  | 55.81%    |
| Primary education                         | 512                   | 18.27%    | 414                   | 18.21%    | 336                   | 18.68%    |
| Secondary or above                        | 738                   | 26.34%    | 551                   | 24.23%    | 459                   | 25.51%    |
| <b>Hypertension</b>                       |                       |           |                       |           |                       |           |
| No hypertension                           | 2124                  | 75.80%    | 1720                  | 75.64%    | 1365                  | 75.88%    |
| Hypertension with treatment               | 522                   | 18.63%    | 1720                  | 75.64%    | 358                   | 19.90%    |
| Hypertension without treatment            | 156                   | 5.57%     | 130                   | 5.72%     | 76                    | 4.22%     |
| <b>Diabetes</b>                           |                       |           |                       |           |                       |           |
| No Diabetes in baseline                   | 2643                  | 94.33%    | 2140                  | 94.11%    | 1704                  | 94.72%    |

|                                                 |       |                     |       |                     |       |                     |
|-------------------------------------------------|-------|---------------------|-------|---------------------|-------|---------------------|
| Have Diabetes with treatment                    | 143   | 5.10%               | 120   | 5.28%               | 86    | 4.78%               |
| Have Diabetes without treatment                 | 16    | 0.57%               | 14    | 0.62%               | 9     | 0.50%               |
|                                                 | Count | Mean (SD)           | Count | Mean (SD)           | Count | Mean (SD)           |
| Age                                             | 2802  | 55.84 (8.22)        | 2274  | 56.19 (7.75)        | 1799  | 57.90 (7.43)        |
| Annual Household Expenditure, yuan <sup>a</sup> | 2802  | 13786.99 (14197.29) | 2274  | 13060.14 (13639.33) | 1799  | 16632.84 (18568.24) |
| Visuospatial ability <sup>b</sup>               | 2802  | 0.51 (0.50)         | 2274  | 0.48 (0.50)         | 1799  | 0.49 (0.50)         |
| Orientation and attention <sup>c</sup>          | 2802  | 5.87 (3.29)         | 2274  | 5.84 (3.19)         | 1799  | 5.97 (3.14)         |
| Memory Scores <sup>d</sup>                      | 2802  | 3.33 (1.96)         | 2274  | 3.04 (1.93)         | 1799  | 3.15 (1.91)         |
| Baseline Visuospatial ability                   | 2802  | 0.57 (0.50)         | 2274  | 0.55 (0.50)         | 1799  | 0.54 (0.50)         |
| Baseline Orientation and attention              | 2802  | 6.39 (2.92)         | 2274  | 6.25 (2.90)         | 1799  | 6.16 (3.00)         |
| Baseline Memory Scores                          | 2802  | 3.27 (1.98)         | 2274  | 3.23 (1.92)         | 1799  | 3.50 (1.78)         |
| Baseline CES-D Score <sup>e</sup>               | 2802  | 12.09 (5.38)        | 2274  | 12.13 (5.45)        | 1799  | 10.90 (5.14)        |

Abbreviation: SHS, secondhand smoke.

a 1 US dollar = 6.3 yuan.

b The score range for visuospatial ability was 0-1.

c The score range for orientation and attention was 0-10. Higher scores indicate better mental status.

d The score range for episodic memory was 0-10. Higher scores indicate better memory function.

e A score of 10 or greater indicated the presence of depressive symptoms.

Table 2. Adjusted Multivariable linear regression analysis of the relationship between smoking exposure and Visuospatial function and Orientation and Attention among older Chinese women (N = 6875), 2011–2013–2015

| VARIABLES                                 | Visuospatial Function  |              |       | Orientation and Attention |              |       |
|-------------------------------------------|------------------------|--------------|-------|---------------------------|--------------|-------|
|                                           | $\beta$<br>coefficient | 95%CI        | t     | $\beta$ coefficient       | 95%CI        | t     |
| <b>Age</b>                                | -0.01 <sup>a</sup>     | -0.01, -0.00 | -6.73 | -0.02 <sup>a</sup>        | -0.03, -0.01 | -4.34 |
| <b>Expenditure</b>                        | 0.00                   | 0.00, 0.00   | 0.01  | 0.00 <sup>a</sup>         | 0.00, 0.00   | 0.77  |
| <b>SHS Exposure<sup>d</sup></b>           |                        |              |       |                           |              |       |
| <b>25 to &lt;30 years</b>                 | -0.01                  | -0.04, 0.02  | -0.72 | 0.05                      | -0.12, 0.21  | 0.56  |
| <b>≥30 to &lt;40 years</b>                | -0.02                  | -0.05, 0.02  | -0.95 | -0.03                     | -0.20, 0.13  | -0.38 |
| <b>≥ 40 years</b>                         | -0.04 <sup>c</sup>     | -0.08, 0.01  | -1.67 | -0.15                     | -0.38, 0.09  | -1.24 |
| <b>Baseline Visuospatial Function</b>     | 0.23 <sup>a</sup>      | 0.21, 0.26   | 17.93 |                           |              |       |
| <b>Baseline Orientation and Attention</b> |                        |              |       | 0.55 <sup>a</sup>         | 0.53, 0.57   | 44.86 |

1  
2  
3  
4  
5  
6  
7  
8  
9  
10  
11  
12  
13  
14  
15  
16  
17  
18  
19  
20  
21  
22  
23  
24  
25  
26  
27  
28  
29  
30  
31  
32  
33  
34  
35  
36  
37  
38  
39  
40  
41  
42  
43  
44  
45  
46

|                                 |                    |             |       |                    |              |       |
|---------------------------------|--------------------|-------------|-------|--------------------|--------------|-------|
| <b>Urban<sup>e</sup></b>        | 0.06 <sup>a</sup>  | 0.04, 0.09  | 5.27  | 0.38 <sup>a</sup>  | 0.25, 0.51   | 5.72  |
| <b>Education<sup>f</sup></b>    |                    |             |       |                    |              |       |
| <b>Primary</b>                  | 0.23 <sup>a</sup>  | 0.20, 0.26  | 14.00 | 1.11 <sup>a</sup>  | 0.94, 1.27   | 12.91 |
| <b>Secondary or Above</b>       | 0.29 <sup>a</sup>  | 0.26, 0.32  | 18.51 | 1.18 <sup>a</sup>  | 1.01, 1.36   | 13.44 |
| <b>Hypertension<sup>g</sup></b> |                    |             |       |                    |              |       |
| <b>With Treatment</b>           | -0.03              | -0.09, 0.02 | -1.20 | 0.06               | -0.24, 0.35  | -0.38 |
| <b>Without Treatment</b>        | -0.02              | -0.06, 0.03 | -0.69 | 0.06               | -0.11, 0.24  | 0.04  |
| <b>Missing Group</b>            | -0.05 <sup>c</sup> | -0.12, 0.01 | -1.67 | 0.06               | -0.19, 0.30  | -0.01 |
| <b>Diabetes<sup>h</sup></b>     |                    |             |       |                    |              |       |
| <b>With Treatment</b>           | 0.02               | -0.03, 0.07 | 0.90  | 0.25 <sup>c</sup>  | -0.03, 0.52  | -1.77 |
| <b>Without Treatment</b>        | 0.03               | -0.04, 0.09 | 0.82  | 0.21               | -0.06, 0.48  | -0.23 |
| <b>Missing Group</b>            | 0.07               | -0.08, 0.21 | 0.88  | 0.50               | -0.22, 1.23  | 0.67  |
| <b>Baseline CES-D Score</b>     | -0.00 <sup>c</sup> | -0.00, 0.00 | -1.71 | -0.02 <sup>b</sup> | -0.03, -0.00 | -2.57 |
| <b>year = 2</b>                 | -0.02              | -0.04, 0.01 | -1.58 | 0.09               | -0.05, 0.22  | 1.29  |

Abbreviations: CI, confidence interval; SHS, secondhand smoke.

a. p<0.01

1  
2  
3  
4  
5 b.  $p < 0.05$

6 c.  $p < 0.1$

7 d. Referent: No SHS exposure or Less than 25 years.

8 e. Expenditure is expressed as the natural log of the annual household expenditure

9 f. Referent: Illiterate

10 g. Referent: Without hypertension

11 h. Referent: Without diabetes

12  
13  
14 I. This model adjusted for age, expenditure, living area, education, baseline hypertension, diabetes, depression status and baseline cognitive function.

15  
16  
17  
18  
19  
20  
21  
22  
23  
24  
25  
26  
27  
28  
29  
30  
31  
32  
33  
34  
35  
36  
37  
38  
39  
40  
41  
42  
43  
44  
45  
46

For peer review only

1  
2  
3  
4  
5  
6  
7  
8  
9  
10  
11  
12  
13  
14  
15  
16  
17  
18  
19  
20  
21  
22  
23  
24  
25  
26  
27  
28  
29  
30  
31  
32  
33  
34  
35  
36  
37  
38  
39  
40  
41  
42  
43  
44  
45  
46

Table 3. Adjusted Multivariable linear regression analysis of the relationship between smoking exposure and Episodic memory and Overall cognitive function among older Chinese women (N = 6875), 2011-2013-2015

| VARIABLES                         | Episodic Memory     |              |        | Overall Cognition   |              |       |
|-----------------------------------|---------------------|--------------|--------|---------------------|--------------|-------|
|                                   | $\beta$ coefficient | 95%CI        | t      | $\beta$ coefficient | 95%CI        | t     |
| <b>Age</b>                        | -0.04 <sup>a</sup>  | -0.05, -0.03 | -11.37 | -0.06 <sup>a</sup>  | -0.07, -0.04 | -7.87 |
| <b>Expenditure</b>                | 0.00                | 0.00, 0.00   | 1.30   | 0.00 <sup>a</sup>   | 0.00, 0.00   | 0.32  |
| <b>SHS Exposure<sup>d</sup></b>   |                     |              |        |                     |              |       |
| <b>25 to &lt;30 years</b>         | -0.04               | -0.16, 0.08  | -0.67  | -0.01               | -0.25, 0.25  | -0.01 |
| <b>≥30 to &lt;40 years</b>        | 0.02                | -0.09, 0.13  | 0.36   | -0.05               | -0.29, 0.19  | -0.41 |
| <b>≥ 40 years</b>                 | -0.16 <sup>b</sup>  | -0.31, -0.01 | -2.06  | -0.33 <sup>a</sup>  | -0.66, 0.01  | -1.93 |
| <b>Baseline Episodic Memory</b>   | 0.30 <sup>a</sup>   | 0.28, 0.32   | 25.22  |                     |              |       |
| <b>Baseline Overall Cognition</b> |                     |              |        | 0.55 <sup>a</sup>   | 0.46, 0.83   | 44.95 |



|                                 |                    |              |       |                   |             |       |
|---------------------------------|--------------------|--------------|-------|-------------------|-------------|-------|
| <b>Urban<sup>e</sup></b>        | 0.25 <sup>a</sup>  | 0.16, 0.34   | 5.60  | 0.65 <sup>a</sup> | 0.46, 0.83  | 6.68  |
| <b>Education<sup>f</sup></b>    |                    |              |       |                   |             |       |
| <b>Primary</b>                  | 0.70 <sup>a</sup>  | 0.58, 0.80   | 12.42 | 1.77 <sup>a</sup> | 1.53, 2.02  | 14.28 |
| <b>Secondary or Above</b>       | 0.97 <sup>a</sup>  | 0.86, 1.08   | 17.29 | 2.00 <sup>a</sup> | 1.74, 2.26  | 15.24 |
| <b>Hypertension<sup>g</sup></b> |                    |              |       |                   |             |       |
| <b>With Treatment</b>           | 0.04               | -0.16, 0.23  | 0.35  | 0.13              | -0.29, 0.56 | 0.62  |
| <b>Without Treatment</b>        | 0.06               | -0.06, 0.17  | 0.95  | 0.12              | -0.14, 0.38 | 0.93  |
| <b>Missing Group</b>            | 0.07               | -0.12, 0.25  | 0.70  | 0.10              | -0.27, 0.47 | 0.52  |
| <b>Diabetes<sup>h</sup></b>     |                    |              |       |                   |             |       |
| <b>With Treatment</b>           | -0.20 <sup>b</sup> | -0.38, 0.02  | -2.20 | -0.04             | -0.43, 0.36 | 0.62  |
| <b>Without Treatment</b>        | -0.07              | -0.25, 0.11  | -0.77 | 0.08              | -0.30, 0.47 | 0.43  |
| <b>Missing Group</b>            | 0.32               | -0.16, 0.80  | 1.30  | 0.87              | -0.11, 1.84 | 1.75  |
| <b>Baseline CES-D Score</b>     | -0.01 <sup>b</sup> | -0.01, 0.00  | -1.59 | -0.01             | -0.03, 0.00 | -2.57 |
| <b>year = 2</b>                 | -0.24              | -0.33, -0.15 | -5.21 | -0.17             | -0.37, 0.03 | -1.70 |

1  
2  
3  
4  
5  
6  
7  
8  
9  
10  
11  
12  
13  
14  
15  
16  
17  
18  
19  
20  
21  
22  
23  
24  
25  
26  
27  
28  
29  
30  
31  
32  
33  
34  
35  
36  
37  
38  
39  
40  
41  
42  
43  
44  
45  
46

---

|                 |      |            |       |                   |            |       |
|-----------------|------|------------|-------|-------------------|------------|-------|
| <b>Constant</b> | 0.63 | 0.53, 0.74 | 11.54 | 6.48 <sup>a</sup> | 5.59, 7.37 | 14.28 |
|-----------------|------|------------|-------|-------------------|------------|-------|

---

- Abbreviations: CI, confidence interval; SHS, secondhand smoke.
- a. p<0.01
  - b. p<0.05
  - c. p<0.1
  - d. Referent: No SHS exposure or Less than 25 years.
  - e. Expenditure is expressed as the natural log of the annual household expenditure
  - f. Referent: Illiterate
  - g. Referent: Without hypertension
  - h. Referent: Without diabetes
  - I. This model adjusted for age, expenditure, living area, education, baseline hypertension, diabetes, depression status and baseline cognitive function.

For peer review only

STROBE Statement—Checklist of items that should be included in reports of *cohort studies*

|                              | Item No | Recommendation                                                                                                                                                                                                                                                                                                         | Page No |
|------------------------------|---------|------------------------------------------------------------------------------------------------------------------------------------------------------------------------------------------------------------------------------------------------------------------------------------------------------------------------|---------|
| <b>Title and abstract</b>    | 1       | (a) Indicate the study's design with a commonly used term in the title or the abstract<br>(b) Provide in the abstract an informative and balanced summary of what was done and what was found                                                                                                                          | 1-3     |
| <b>Introduction</b>          |         |                                                                                                                                                                                                                                                                                                                        |         |
| Background/rationale         | 2       | Explain the scientific background and rationale for the investigation being reported                                                                                                                                                                                                                                   | 4       |
| Objectives                   | 3       | State specific objectives, including any prespecified hypotheses                                                                                                                                                                                                                                                       | 5       |
| <b>Methods</b>               |         |                                                                                                                                                                                                                                                                                                                        |         |
| Study design                 | 4       | Present key elements of study design early in the paper                                                                                                                                                                                                                                                                | 6       |
| Setting                      | 5       | Describe the setting, locations, and relevant dates, including periods of recruitment, exposure, follow-up, and data collection                                                                                                                                                                                        | 6       |
| Participants                 | 6       | (a) Give the eligibility criteria, and the sources and methods of selection of participants. Describe methods of follow-up<br>(b) For matched studies, give matching criteria and number of exposed and unexposed                                                                                                      | 6       |
| Variables                    | 7       | Clearly define all outcomes, exposures, predictors, potential confounders, and effect modifiers. Give diagnostic criteria, if applicable                                                                                                                                                                               | 7-9     |
| Data sources/<br>measurement | 8*      | For each variable of interest, give sources of data and details of methods of assessment (measurement). Describe comparability of assessment methods if there is more than one group                                                                                                                                   | 7-9     |
| Bias                         | 9       | Describe any efforts to address potential sources of bias                                                                                                                                                                                                                                                              | 9       |
| Study size                   | 10      | Explain how the study size was arrived at                                                                                                                                                                                                                                                                              | 6       |
| Quantitative variables       | 11      | Explain how quantitative variables were handled in the analyses. If applicable, describe which groupings were chosen and why                                                                                                                                                                                           | 7-9     |
| Statistical methods          | 12      | (a) Describe all statistical methods, including those used to control for confounding<br>(b) Describe any methods used to examine subgroups and interactions<br>(c) Explain how missing data were addressed<br>(d) If applicable, explain how loss to follow-up was addressed<br>(e) Describe any sensitivity analyses | 9-10    |
| <b>Results</b>               |         |                                                                                                                                                                                                                                                                                                                        |         |
| Participants                 | 13*     | (a) Report numbers of individuals at each stage of study—eg numbers potentially eligible, examined for eligibility, confirmed eligible, included in the study, completing follow-up, and analysed<br>(b) Give reasons for non-participation at each stage<br>(c) Consider use of a flow diagram                        | 6       |
| Descriptive data             | 14*     | (a) Give characteristics of study participants (eg demographic, clinical, social) and information on exposures and potential confounders<br>(b) Indicate number of participants with missing data for each variable of interest<br>(c) Summarise follow-up time (eg, average and total amount)                         | 10-11   |
| Outcome data                 | 15*     | Report numbers of outcome events or summary measures over time                                                                                                                                                                                                                                                         | 11      |

|    |                          |    |                                                                                                                                                                                                              |       |
|----|--------------------------|----|--------------------------------------------------------------------------------------------------------------------------------------------------------------------------------------------------------------|-------|
| 1  | Main results             | 16 | (a) Give unadjusted estimates and, if applicable, confounder-adjusted estimates and their precision (eg, 95% confidence interval). Make clear which confounders were adjusted for and why they were included | 11    |
| 2  |                          |    | (b) Report category boundaries when continuous variables were categorized                                                                                                                                    |       |
| 3  |                          |    | (c) If relevant, consider translating estimates of relative risk into absolute risk for a meaningful time period                                                                                             |       |
| 4  |                          |    |                                                                                                                                                                                                              |       |
| 5  |                          |    |                                                                                                                                                                                                              |       |
| 6  |                          |    |                                                                                                                                                                                                              |       |
| 7  |                          |    |                                                                                                                                                                                                              |       |
| 8  |                          |    |                                                                                                                                                                                                              |       |
| 9  | Other analyses           | 17 | Report other analyses done—eg analyses of subgroups and interactions, and sensitivity analyses                                                                                                               | 11-12 |
| 10 |                          |    |                                                                                                                                                                                                              |       |
| 11 | <b>Discussion</b>        |    |                                                                                                                                                                                                              |       |
| 12 |                          |    |                                                                                                                                                                                                              |       |
| 13 | Key results              | 18 | Summarise key results with reference to study objectives                                                                                                                                                     | 12    |
| 14 | Limitations              | 19 | Discuss limitations of the study, taking into account sources of potential bias or imprecision. Discuss both direction and magnitude of any potential bias                                                   | 15-16 |
| 15 |                          |    |                                                                                                                                                                                                              |       |
| 16 | Interpretation           | 20 | Give a cautious overall interpretation of results considering objectives, limitations, multiplicity of analyses, results from similar studies, and other relevant evidence                                   | 13-15 |
| 17 |                          |    |                                                                                                                                                                                                              |       |
| 18 |                          |    |                                                                                                                                                                                                              |       |
| 19 | Generalisability         | 21 | Discuss the generalisability (external validity) of the study results                                                                                                                                        | 12    |
| 20 |                          |    |                                                                                                                                                                                                              |       |
| 21 | <b>Other information</b> |    |                                                                                                                                                                                                              |       |
| 22 | Funding                  | 22 | Give the source of funding and the role of the funders for the present study and, if applicable, for the original study on which the present article is based                                                | 17    |
| 23 |                          |    |                                                                                                                                                                                                              |       |
| 24 |                          |    |                                                                                                                                                                                                              |       |

25  
26 \*Give information separately for exposed and unexposed groups.

27  
28 **Note:** An Explanation and Elaboration article discusses each checklist item and gives methodological background and  
29 published examples of transparent reporting. The STROBE checklist is best used in conjunction with this article (freely  
30 available on the Web sites of PLoS Medicine at <http://www.plosmedicine.org/>, Annals of Internal Medicine at  
31 <http://www.annals.org/>, and Epidemiology at <http://www.epidem.com/>). Information on the STROBE Initiative is  
32 available at <http://www.strobe-statement.org>.  
33  
34  
35  
36  
37  
38  
39  
40  
41  
42  
43  
44  
45  
46  
47  
48  
49  
50  
51  
52  
53  
54  
55  
56  
57  
58  
59  
60

# BMJ Open

**The impact of secondhand smoke exposure on cognitive function among middle-aged and older women in China: Findings from 3-waves of the China Health and Retirement Longitudinal Study**

|                                 |                                                                                                                                                                                                                              |
|---------------------------------|------------------------------------------------------------------------------------------------------------------------------------------------------------------------------------------------------------------------------|
| Journal:                        | <i>BMJ Open</i>                                                                                                                                                                                                              |
| Manuscript ID                   | bmjopen-2020-039824.R3                                                                                                                                                                                                       |
| Article Type:                   | Original research                                                                                                                                                                                                            |
| Date Submitted by the Author:   | 30-Sep-2020                                                                                                                                                                                                                  |
| Complete List of Authors:       | Bai, Anying; Peking University Health Science Centre, School of Public Health;<br>Jin, Yinzi; Peking University, School of Public Health<br>Huang, Yangmu; Peking University Health Science Centre, School of Public Health; |
| <b>Primary Subject Heading</b>: | Epidemiology                                                                                                                                                                                                                 |
| Secondary Subject Heading:      | Smoking and tobacco, Public health, Mental health                                                                                                                                                                            |
| Keywords:                       | EPIDEMIOLOGY, Dementia < NEUROLOGY, PUBLIC HEALTH                                                                                                                                                                            |
|                                 |                                                                                                                                                                                                                              |

SCHOLARONE™  
Manuscripts



I, the Submitting Author has the right to grant and does grant on behalf of all authors of the Work (as defined in the below author licence), an exclusive licence and/or a non-exclusive licence for contributions from authors who are: i) UK Crown employees; ii) where BMJ has agreed a CC-BY licence shall apply, and/or iii) in accordance with the terms applicable for US Federal Government officers or employees acting as part of their official duties; on a worldwide, perpetual, irrevocable, royalty-free basis to BMJ Publishing Group Ltd ("BMJ") its licensees and where the relevant Journal is co-owned by BMJ to the co-owners of the Journal, to publish the Work in this journal and any other BMJ products and to exploit all rights, as set out in our [licence](#).

The Submitting Author accepts and understands that any supply made under these terms is made by BMJ to the Submitting Author unless you are acting as an employee on behalf of your employer or a postgraduate student of an affiliated institution which is paying any applicable article publishing charge ("APC") for Open Access articles. Where the Submitting Author wishes to make the Work available on an Open Access basis (and intends to pay the relevant APC), the terms of reuse of such Open Access shall be governed by a Creative Commons licence – details of these licences and which [Creative Commons](#) licence will apply to this Work are set out in our licence referred to above.

Other than as permitted in any relevant BMJ Author's Self Archiving Policies, I confirm this Work has not been accepted for publication elsewhere, is not being considered for publication elsewhere and does not duplicate material already published. I confirm all authors consent to publication of this Work and authorise the granting of this licence.

---

1  
2  
3  
4 1 **Title**

5  
6 2 The impact of secondhand smoke exposure on cognitive  
7  
8  
9 3 function among middle-aged and older women in China:  
10  
11 4 Findings from 3-waves of the China Health and Retirement  
12  
13 5 Longitudinal Study

14  
15  
16 6 Anying, Bai <sup>1</sup>, Yinzi Jin Ph.D.<sup>1</sup>, Yangmu Huang Ph.D.<sup>1</sup>

17  
18  
19 7 <sup>1</sup> School of Public Health, Peking University Health and  
20  
21  
22 8 Science Centre

23  
24 9

25 10

26 11

27 12

28 13

29 14

30 15

31 16

32 17

33 18

34 19

35 20

36 21

37 22

38 23

39 24

40 25

41 26

42 27

43 28

44 29 Corresponding Author:

45 30 Yangmu Huang, Ph.D.

46 31 Peking University Health and Science Centre, School of  
47 32 Public Health

48 33 Xueyuan Road No.38, Haidian Distreet, BeiJing, China

49 34 Tel: 15010376131

50 35 Fax: 010-62755782

51 36 Email: ymhuang@bjmu.edu.cn

1  
2  
3 37  
4 38  
5 39  
6 40  
7  
8  
9 41  
10

11  
12 **Abstract**  
13

14 **Objectives:** To examine the association between secondhand  
15  
16  
17 smoke and women's global cognitive function and cognitive  
18  
19 subdomains.  
20

21  
22 **Design:** Cohort study  
23

24  
25 **Participants:** Data for this study were obtained from the  
26  
27 China Health and Retirement Longitudinal Study (CHARLS,  
28  
29 2011-2013-2015), and pooled analysis was applied to wave  
30  
31 1 and wave 2 (2011-2013), wave 2 and wave 3 (2013-2015)  
32  
33 and wave 1 and wave 3 (2011-2015). Data from a total of  
34  
35 6875 Chinese women with normal cognitive function at  
36  
37  
38 baseline were selected for analysis, including 2981 who  
39  
40  
41 were interviewed in 2011, 2471 in 2013, and 1894 in 2015.  
42  
43  
44

45 **Main outcome measures and methods:** Secondhand smoke (SHS) was  
46  
47  
48 classified based on the number of exposed years  
49  
50 (<25years, ≥25 to <30 years, ≥30 to <40 years, ≥40  
51  
52 years). Global cognitive function, visuospatial ability,  
53  
54 orientation and attention, as well as episodic memory  
55  
56 function were used as measures of cognitive function.  
57  
58  
59  
60



1  
2  
3  
4 61 Three waves of data were pooled by using a dummy variable  
5  
6 62 to differentiate between 2-year and 4-year groups. Lagged  
7  
8  
9 63 dependent variable models were used to examine  
10  
11 64 independent associations between secondhand smoke and  
12  
13  
14 65 cognitive function. Demographic factors, socioeconomic  
15  
16  
17 66 factors, baseline cognitive functioning and health  
18  
19 67 conditions were controlled for in our models.

20  
21  
22 68 **Results:** Secondhand smoke was found to be inversely and  
23  
24  
25 69 significantly associated with cognitive function.  
26  
27 70 Compared with those had not been exposed to household  
28  
29  
30 71 secondhand smoke, women who had lived with a smoking  
31  
32  
33 72 husband had a significantly faster cognition decline,  
34  
35 73 especially in global cognitive function ( $\beta=-0.33$ , 95%CI=  
36  
37 74  $-0.66$  to  $-0.01$ ,  $P < 0.01$ ), visuospatial ability ( $\beta=-0.04$ ,  
38  
39 75 95%CI= $-0.08$  to  $-0.01$   $P < 0.05$ ) and episodic memory  
40  
41  
42 76 function ( $\beta=-0.16$ , 95%CI=  $-0.31$  to  $-0.01$   $P = 0.031$ ).

43  
44  
45 77 **Conclusions:** Household secondhand smoke exposure for more  
46  
47  
48 78 than 40 years was associated with a more significant  
49  
50  
51 79 decline in global cognitive function, visuospatial  
52  
53 80 ability and episodic memory function, but not in  
54  
55  
56 81 orientation and attention function among older Chinese  
57  
58 82 women.  
59  
60

---

83 **Key words:** ageing; passive smoking; panel analysis;

84 visuospatial ability; memory

85 **Strengths and limitations of this study:**

86 ➤ This is the first study to investigate the association  
87 between secondhand smoke exposure and different domains  
88 of women's cognitive function in China by using 4-year  
89 of longitudinal national representative data.

90 ➤ This study addressed the issue of reverse causation in observational cohort studies  
91 by used lagged dependent variable models and adjust for baseline cognition scores

92 ➤ The exposure to secondhand smoke was evaluated based on  
93 self-reported measures.

94 ➤ The analyses only contained household SHS exposure and  
95 excluded environmental exposure.

97 **Word Count: 3352**

98 **Number of references:32**

99 **Number of data elements:1**

100

101 **Introduction**

102 China's population has been ageing rapidly. By 2050,  
103 there will be 400 million Chinese citizens aged over 65  
104 years old, 150 million of whom will be older than 80 years

---

1  
2  
3  
4 105 old<sup>[1]</sup>. It will become increasingly important to understand  
5  
6 106 the cognitive changes that accompany ageing<sup>[2]</sup>. Cognitive  
7  
8  
9 107 impairment, described as a decline in intellectual  
10  
11 108 function<sup>[3]</sup>, ranges from mild forms of forgetfulness to  
12  
13  
14 109 severe and debilitating dementia <sup>[4]</sup>. The prevalence of  
15  
16  
17 110 cognitive impairment is rising, with national figures  
18  
19 111 estimating that over 9.4% of older persons in China had  
20  
21  
22 112 cognitive impairment in 2011 <sup>[4]</sup>.

23  
24  
25 113 Numerous determinants such as environmental, individual,  
26  
27 114 and genetic factors could favor evolution toward cognitive  
28  
29  
30 115 impairment, and both age and late-life hypertension  
31  
32 116 increase the risk of dementia over time <sup>[5]</sup>. The mechanism  
33  
34  
35 117 lies in age-related functional and structural changes in  
36  
37 118 cerebrovascular small and large blood vessels <sup>[6]</sup>. Besides  
38  
39  
40 119 chronic diseases factors, depression has long been known  
41  
42 120 to affect memory and other neurocognitive domains. Previous  
43  
44  
45 121 studies have emphasized that depression could increase the  
46  
47  
48 122 risk of developing mild cognitive impairment (MCI) in  
49  
50  
51 123 cognitively normal elderly people<sup>[7]</sup> .

52  
53 124 Exposure to secondhand smoke (SHS), also known as  
54  
55  
56 125 "passive smoking," refers to a situation where a never-  
57  
58  
59 126 smoker inhales another person's smoke either by exposure  
60

---

1  
2  
3  
4 127 to sidestream smoke or mainstream smoke <sup>[8]</sup>. Current smoking  
5  
6 128 prevalence in China has decreased from 31.1% in 2002 to  
7  
8  
9 129 28.1% in 2010; however, the number of adults exposed to SHS  
10  
11 130 during this period still increased from 540 million to 556  
12  
13  
14 131 million due to population growth <sup>[2]</sup>. The negative health  
15  
16  
17 132 effects of high levels of exposure to SHS may be close to  
18  
19  
20 133 those of active smoking, including inferior performance on  
21  
22 134 measures of general intelligence, visuospatial learning and  
23  
24  
25 135 memory and fine motor dexterity<sup>[9]</sup>. Given the association  
26  
27 136 between exposure to SHS and risk factors for cognitive  
28  
29  
30 137 impairment such as cardiovascular disease<sup>[10]</sup>,  
31  
32 138 hypertension<sup>[11]</sup>, and stroke <sup>[12]</sup>, it is possible that a high  
33  
34  
35 139 level of exposure may be a preventable risk factor for  
36  
37  
38 140 cognitive impairment or dementia <sup>[11, 13]</sup>.

39  
40 141 There is some evidence to suggest that older current  
41  
42 142 smokers (ages  $\geq 63$ ) <sup>[14]</sup> or those being exposed to SHS (aged  
43  
44 143 55–64) <sup>[13–16]</sup> were more likely to develop cognitive  
45  
46  
47 144 impairment compared with never-smokers. However, much less  
48  
49  
50 145 is known about whether and to what extent, SHS is associated  
51  
52 146 with global and subdomains of cognitive function among  
53  
54  
55 147 elder women in China. Previous studies in China indicated  
56  
57  
58 148 that SHS exposure increased the risk of cognitive  
59  
60

1  
2  
3  
4 149 impairment in older adults<sup>[17, 18]</sup>. Nevertheless, both of  
5  
6 150 these studies only used 2-wave longitudinal data and did  
7  
8  
9 151 not control for baseline cognition<sup>[17, 18]</sup>. Therefore, the  
10  
11 152 primary aim of this study was to investigate the  
12  
13 153 relationship between SHS and cognitive function among older  
14  
15 154 non-smoking Chinese women, using a 3-wave longitudinal  
16  
17 155 national representative data. Through the classification  
18  
19 156 of respondents by different years of SHS exposure in a 4-  
20  
21 157 year panel, we identified whether certain high SHS exposure  
22  
23 158 groups were at higher risk of cognitive decline than others  
24  
25 159 after controlling for confounders. Besides, we aimed to  
26  
27 160 examine the association between SHS exposure and cognitive  
28  
29 161 subdomains. This is especially important given the growing  
30  
31 162 and ageing population, and increasing prevalence of SHS  
32  
33 163 exposure in China.  
34  
35  
36  
37  
38  
39  
40  
41  
42

## 43 **Methods**

### 44 **Data**

45  
46 165 CHARLS had passed the ethical review before field investigation and we used data  
47  
48 166 from 3 waves of the China Health and Retirement Longitudinal Study (CHARLS,2011-  
49  
50 167 2013-2015), which was publicly available at <http://charls.pku.edu.cn>. CHARLS  
51  
52 168 involved participants with a nationally representative  
53  
54 169 survey of adults aged 45 years or older, as well as their  
55  
56  
57  
58  
59  
60

---

1  
2  
3  
4 171 spouses when possible, and included assessments of social,  
5  
6 172 economic, and health circumstances of community-residents.  
7  
8  
9 173 The national baseline survey was conducted between June  
10  
11 174 2011 and March 2012 and samples were chosen through  
12  
13 175 multistage probability sampling. After excluding empty or  
14  
15 176 non-resident dwellings, final interviews were conducted on  
16  
17 177 17,708 respondents from 10,257 households, which completed  
18  
19 178 at least one module of the survey beyond the cover screening  
20  
21 179 for age eligibility. CHARLS respondents were followed every  
22  
23 180 2 years, using a face-to-face computer-assisted personal  
24  
25 181 interview (CAPI) <sup>[14]</sup>. SHS mainly affects married women in  
26  
27 182 China. Though unmarried or cohabiting women can possibly  
28  
29 183 be affected by household SHS, this kind of influence  
30  
31 184 remains scarce. At baseline, there were 3381 married women  
32  
33 185 who never smoked cigarettes and lived with spouses who had  
34  
35 186 either smoked cigarettes in the past or smoked at the time  
36  
37 187 of interview. Data for each variable was therefore  
38  
39 188 collected for those respondents. Our final sample was  
40  
41 189 composed of 6875 respondents. Among them, 2802 were  
42  
43 190 interviewed again during the second wave of data collection  
44  
45 191 in 2013, and 2247 were interviewed again during the third  
46  
47 192 wave in 2015. The similar sample selection process was  
48  
49  
50  
51  
52  
53  
54  
55  
56  
57  
58  
59  
60

---

1  
2  
3  
4 193 conducted for participants in the second wave in 2013 as a  
5  
6 194 baseline. The final sample consisted of 1799 women who were  
7  
8  
9 195 investigated again in 2015 as participants.  
10

## 11 196 **Measures**

### 12 197 ***Secondhand Smoke***

13  
14  
15  
16  
17 198 In this study, the exposure to SHS among Chinese women  
18  
19 199 was assessed through several surveys based on the  
20  
21 200 standardized CHARLS questionnaire. Questions about the  
22  
23 201 participant's current marital status, the year they got  
24  
25 202 married, and the year the husband in each household has  
26  
27 203 begun or ceased smoking at home were asked.  
28  
29

30  
31  
32 204 The smoking status section contained four questions:  
33  
34 205 "Have you ever chewed tobacco, smoked a pipe, smoked self-  
35  
36 206 rolled cigarettes, or smoked cigarettes/cigars?", "Do you  
37  
38 207 still have the habit or have you totally quit?", "At what  
39  
40 208 age did you totally quit smoking?" and "At what age did you  
41  
42 209 start to smoke on a regular basis?". If the answer to the  
43  
44 210 first question was "yes", they were defined as "current  
45  
46 211 smokers" or "ex-smokers". Our analysis of SHS exposure  
47  
48 212 focused only on never smokers excluding the "current  
49  
50 213 smokers" and "ex-smokers", because of the difficulty to  
51  
52 214 differentiate the negative effects of active smoking on  
53  
54  
55  
56  
57  
58  
59  
60

---

1  
2  
3  
4 215 health condition from that of SHS exposure. The length of  
5  
6 216 SHS exposure was calculated and expressed as the total  
7  
8  
9 217 number of years that never-smoking women spent living with  
10  
11 218 their spouses who smoked cigarettes at home.

12  
13  
14 219 Categorical classification of SHS was used because the  
15  
16 220 impact of SHS might be neglected if we only used a  
17  
18  
19 221 continuous variable to represent exposure. Similarly  
20  
21 222 compared with continuous variables categorical variables  
22  
23  
24 223 have greater public health significance. Based on the  
25  
26 224 constructed SHS exposure variable, participants were  
27  
28  
29 225 classified into four different groups: Never or being  
30  
31 226 exposed to SHS for less than 25 years, more than 25 years  
32  
33  
34 227 and less than 30 years, more than 30 years and less than  
35  
36 228 40 years and over 40 years. The cut-off boundaries of SHS  
37  
38  
39 229 exposure were decided to realize the relatively balanced  
40  
41 230 population distribution frequency among different levels  
42  
43  
44 231 of exposure year.

### 45 46 47 48 232 ***Cognitive function***

49  
50 233 The cognitive function of the respondents in CHARLS  
51  
52 234 questionnaires was measured through a question-and-answer  
53  
54  
55 235 interview instrument, and the respondents were followed  
56  
57  
58 236 every two years using a face-to-face, computer-aided  
59  
60



1  
2  
3  
4 237 personal interview (CAPI). The various sections of the questionnaire could  
5  
6 238 assess cognitive subdomains including visuospatial ability, orientation and attention,  
7  
8  
9 239 and episodic memory. Figure drawing was tested by asking the participants to  
10  
11  
12 240 reproduce a picture of two overlapped pentagons in CHARLS questionnaires<sup>[18]</sup>. It was  
13  
14  
15 241 used to measure a person's ability to identify visual and spatial relationships among  
16  
17 242 objects. The Telephone Interview of Cognitive Status (TICS)  
18  
19 243 was a screening test, including serial subtractions of 7  
20  
21  
22 244 from 100 (up to 5 times), date (month, day, and year and  
23  
24  
25 245 season), and the day of the week. In order to assess orientation and  
26  
27 246 attention function, the number of correct answers to the above questions in TICS was  
28  
29  
30 247 scored and summed up (range 0 to 10). Participants who successfully completed the  
31  
32  
33 248 task received a score of 1, and those who failed received 0<sup>[19]</sup>.

34  
35 249 In addition, the word recall test consisted of 2  
36  
37  
38 250 components, immediate recall and delayed recall, and  
39  
40  
41 251 evaluated episodic memory. Participants were required to  
42  
43  
44 252 repeat 10 Chinese nouns just read to them, and then after  
45  
46  
47 253 20 questions concerning Center for Epidemiologic Studies  
48  
49 254 Depression Scale (CES-D, approximately 4 to 10 minutes)  
50  
51 255 they were again asked to recall as many of the original  
52  
53  
54 256 words as possible. The item was coded as 1 if recalled by  
55  
56  
57 257 the respondent, and as 0 if not. Scores for immediate and  
58  
59 258 delayed recall both varied from 0 to 10. An evaluated  
60

---

259 episodic memory score was calculated using the mean of  
260 scores in immediate and delayed word recall (range 0 to 10)  
261 [19].

262 The overall cognition scores were the sum of the three  
263 different domains (range 0 to 21).

#### 264 ***Control variables***

265 Given that cognitive function may vary across  
266 demographic and socioeconomic status, we thus included age,  
267 urban/rural residence, education, annual household  
268 expenditures, chronic diseases and depressive symptoms as  
269 control variables. Education was categorized into 3 groups:  
270 "illiterate", "primary education" and "secondary education  
271 or above". Arterial hypertension and diabetes mellitus are  
272 separately strong independent risk factors for the  
273 development of cognitive impairment and dementia<sup>[20]</sup> <sup>[21]</sup>.  
274 Thus, the baseline chronic disease of hypertension and  
275 diabetes were classified as three types based on self-  
276 reported conditions on whether the participants were being  
277 treated: having hypertension/diabetes with treatment,  
278 having hypertension/diabetes without treatment and not  
279 having hypertension/diabetes. The measure of depressive  
280 symptoms was based on the 10-item version of the CES-D

---

281 short form, and each of the 4-option response to the item  
282 was scored ranging from 0 to 3. The total score is the sum  
283 of points for all 10 items, and a score of 10 or higher  
284 suggests the presence of depressive symptoms <sup>[6]</sup>.

285

### 286 ***Patient and Public Involvement***

287 No patient involved.

### 288 **Analysis**

289 All analyses were conducted with STATA, version 14.0  
290 (Stata, College Station, TX, USA). The lagged dependent-  
291 variable (LDV) regression models with ordinary least  
292 squares estimation were used during analysis. LDV models  
293 were superior for analyzing the effects of predictor  
294 variables on an outcome with 2-wave panel data while  
295 controlling for the influence of time-invariant  
296 variables<sup>[22]</sup>. It adjusted for baseline cognitive conditions  
297 for all participants, therefore provided more robust  
298 estimates of the effects of independent variables. After  
299 pooling the three sets of panel data into one through using  
300 the "year" dummy variable to differentiate between a change  
301 in 2 years or in 4 years, we have 6875 respondents who have  
302 complete data on all variables. The overall cognitive

---

1  
2  
3  
4 303 scores, episodic memory scores, visuospatial ability scores  
5  
6 304 and orientation and attention scores were 4 separate  
7  
8  
9 305 outcome variables. The different groups of SHS exposure  
10  
11 306 years were the predictor variable, and other independent  
12  
13 307 variables included all demographic and socioeconomic  
14  
15 308 characteristics. Prior to fitting the regression models,  
16  
17 309 descriptive analyses were conducted to estimate the mean  
18  
19 310 and standard deviations for continuous data and frequencies  
20  
21 311 and percentages for categorical data.  
22  
23  
24  
25  
26  
27  
28

### 313 **Results**

314 Table 1 provides a descriptive summary of all the  
315 variables for participants from each panel of three  
316 different waves: 2011-2013, 2011-2015 and 2013-2015. High  
317 prevalence of SHS exposure between 30 to 40 years was seen  
318 in different panels, accounting for 32.51%, 35.18% and  
319 42.69% respectively.

320 The participants were over 45 years old, with the mean  
321 age of 56, 56 and 58 years old, respectively in those waves.  
322 Participants were more likely to live in a rural area, have  
323 a lower education background and not to have hypertension  
324 or diabetes diagnoses at baseline. In addition, our results  
325 indicated that the mean baseline cognition scores were

---

1  
2  
3  
4 326 higher than cognition scores after 2 or 4 years. The mean  
5  
6 327 scores of CES-D suggested that the prevalence of depression  
7  
8  
9 328 among Chinese middle-aged and old-aged women increased in  
10  
11 329 those years. Other socio-demographic characteristics of the  
12  
13  
14 330 respondents are shown in Table 1

15  
16  
17 331 Results from the regression models for the  
18  
19 332 relationship between SHS exposure and each domain of the  
20  
21  
22 333 cognitive function and overall cognition scores are  
23  
24 334 reported in Table 2 and Table 3. Scores of episodic  
25  
26  
27 335 memory, orientation and attention and visuospatial among  
28  
29  
30 336 respondents at baseline were strong predictors of their  
31  
32  
33 337 corresponding cognitive function measures after 2 or 4  
34  
35 338 years. Based on the analysis adjusted for age, annual  
36  
37  
38 339 household expenditure, education, baseline cognitive  
39  
40 340 function and another chronic health status, we found that  
41  
42  
43 341 only being exposed to SHS for more than 40 years was  
44  
45 342 significantly associated with a decline in visuospatial  
46  
47  
48 343 abilities, episodic memory and overall cognition scores  
49  
50  
51 344 for all respondents. Compared with respondents who were  
52  
53 345 not exposed to SHS or exposed to it for less than 25  
54  
55  
56 346 years, those who have been exposed to SHS for more than  
57  
58 347 40 years was associated with a 0.04-point decline in  
59  
60

1  
2  
3  
4 348 visuospatial abilities (95%CI, -0.08 to -0.01 P <0.1), a  
5  
6 349 0.16-point decline in episodic memory (95%CI, -0.31 to -  
7  
8 350 0.01 P <0.05), and a 0.33-point decline in overall  
9  
10  
11 351 cognition function (95%CI, -0.66 to -0.01 P <0.01). In  
12  
13  
14 352 addition, age was also negatively associated with  
15  
16  
17 353 cognitive function. Each one-year older was associated  
18  
19 354 with 0.01-point, 0.01-point, 0.03-point, and 0.05-point  
20  
21  
22 355 decrease in visuospatial (95%CI, -0.01 to -0.00 P <0.01),  
23  
24 356 orientation (95%CI, -0.03 to -0.01 P <0.01), memory  
25  
26  
27 357 (95%CI, -0.31 to -0.01 P <0.05) and overall cognition  
28  
29  
30 358 scores (95%CI, -0.66 to -0.01 P <0.01), respectively.  
31  
32  
33 359 High education level was associated with better cognitive  
34  
35 360 performance, especially in orientation and attention. In  
36  
37  
38 361 addition, a one-point increase in CESD scores was  
39  
40  
41 362 associated with 0.02-point decrease in scores of  
42  
43 363 orientation and attention (95%CI, -0.03 to 0.00 P <0.05),  
44  
45 364 showing that respondents with depressive symptoms were  
46  
47  
48 365 more likely to demonstrate a cognitive decline in  
49  
50  
51 366 specific functions.

## 367 **Discussion**

368 Results from this longitudinal study with a large,  
369 representative sample of middle-aged and older women in

1  
2  
3  
4 370 China indicated that exposure to SHS for over 40 years was  
5  
6 371 significantly associated with declining performance of  
7  
8  
9 372 global cognition and cognitive subdomains. It is the first  
10  
11 373 examination of cognitive subdomains concerning household  
12  
13  
14 374 SHS exposure using a 4-year longitudinal data in China. The  
15  
16  
17 375 inferior performance of SHS on visuospatial abilities,  
18  
19 376 episodic memory and orientation and attention abilities are  
20  
21  
22 377 novel because these domains were not specifically evaluated  
23  
24  
25 378 in earlier studies among middle-aged and older women who  
26  
27 379 never smoke. This study builds on previous findings that  
28  
29  
30 380 SHS was associated with poor cognitive performance,  
31  
32 381 especially in children, adolescents and adults <sup>[18]</sup>. We found  
33  
34  
35 382 that having a high educational level, living in an urban  
36  
37  
38 383 area and having better baseline cognitive function would  
39  
40 384 improve their cognitive performance. The episodic memory  
41  
42  
43 385 score of participants with diabetes at baseline decreased  
44  
45  
46 386 by 0.172 points compared with those without diabetes, which  
47  
48 387 is similar to previous findings<sup>[9]</sup>.

49  
50 388 Moreover, our results showed that compared with women  
51  
52  
53 389 who have never been exposed to SHS or have been exposed for  
54  
55  
56 390 less than 20 years, those who have been exposed to SHS for  
57  
58  
59 391 more than 40 years have a significant decline in  
60

1  
2  
3  
4 392 visuospatial function (0.04-point), episodic memory (0,16-  
5  
6 393 point) and overall cognitive scores (0.33-point). These  
7  
8  
9 394 findings were similar in magnitude to prior research on the  
10  
11 395 relationship between SHS and cognitive function <sup>[14]</sup>. Moheet  
12  
13  
14 396 and colleagues (2015) conducted a cross-sectional study in  
15  
16  
17 397 the North East of England to explore the impact of diabetes  
18  
19 398 on cognitive function and brain structure (N=150). Research  
20  
21  
22 399 suggested that compared with non-exposed people,  
23  
24  
25 400 participants who had no history of smoking and being  
26  
27 401 averagely exposed to SHS for around 6 years showed  
28  
29  
30 402 significantly reduced performance in processing speed (i.e.  
31  
32  
33 403 how quickly one can process information and perform tasks)  
34  
35 404 and executive function (i.e. the ability to organize memory,  
36  
37  
38 405 cognitive flexibility, and problem-solving ability) <sup>[22]</sup>.  
39  
40 406 Another longitudinal ageing study in China (N=4809, ages  
41  
42  
43 407  $\geq 50$ ) found that never smokers exposed to the highest levels  
44  
45 408 of SHS (salivary cotinine concentrations 0.8-13.5 ng/ml)  
46  
47  
48 409 were more likely to be cognitively impaired (odds ratio  
49  
50  
51 410 =1.70) than those exposed to little or no SHS <sup>[18]</sup>.

52  
53 411 Attention referred to the ability to concentrate and  
54  
55  
56 412 focus on specific stimuli slightly declined in later life  
57  
58 413 <sup>[13]</sup>. Orientation was one's ability to identify the exact



1  
2  
3  
4 414 date, month, day and season of the year<sup>[23]</sup>. Our results  
5  
6 415 suggested that for each one-year increase in age, there  
7  
8  
9 416 were additional 0.01-point, 0.02-point, 0.04-point and  
10  
11 417 0.06-point decline in visuospatial, orientation, memory and  
12  
13  
14 418 overall cognition scores, respectively. SHS seems to be  
15  
16  
17 419 more strongly associated with cognitive decline than ageing,  
18  
19 420 since the magnitude of significant coefficient between  
20  
21  
22 421 SHS and cognitive decline was almost four times the one in  
23  
24  
25 422 ageing. However, the relationship between SHS and  
26  
27 423 orientation and attention ability was not observed. This  
28  
29  
30 424 may since the size of the sample is relatively small, plus  
31  
32  
33 425 the period of cohort study after controlling for all  
34  
35 426 demographic and socioeconomic confounders is relatively  
36  
37  
38 427 short.

39  
40 428 Visuospatial abilities involve the ability to understand  
41  
42  
43 429 space in two and three dimensions. In our study, an inversed  
44  
45  
46 430 relationship between SHS exposure and visuospatial  
47  
48  
49 431 abilities among middle-aged and older adults was observed,  
50  
51 432 showing a 0.04-point decline in their visuospatial scores.  
52  
53  
54 433 Such an inversed relationship between SHS exposure and  
55  
56  
57 434 visuospatial reasoning skills was also reported among  
58  
59 435 American children (N=5683; ages 6-16), showing that years  
60

---

1  
2  
3  
4 436 of SHS exposure was significantly associated with lower  
5  
6 437 scores for reading, math, and visuospatial skills, after  
7  
8  
9 438 adjusting for covariates <sup>[15]</sup>. As one of the most common  
10  
11 439 cognitive complaints among elders, episodic memory refers  
12  
13  
14 440 to personally experienced events which could be measured  
15  
16  
17 441 by stories, word lists or figures. Previous research has  
18  
19 442 indicated that the onset of memory decline may vary among  
20  
21 443 different memory types, with episodic memory decline  
22  
23 444 possibly being lifelong <sup>[24]</sup>. Our study could not explore  
24  
25 445 the onset age of memory decline without doing regression  
26  
27 446 among different age groups. The significant coefficient may  
28  
29 447 indicate memory decline associated with SHS exposure.

30  
31  
32  
33  
34  
35 448 The inconsistent conclusions between our studies and  
36  
37 449 prior ones may be due to the relatively simplified version  
38  
39 450 of the cognition test procedure in CHARLS questionnaires  
40  
41 451 compared with the Montreal Cognitive Assessment (MoCA) <sup>[14]</sup>  
42  
43 452 and Mini-Mental State Examination (MMSE) <sup>[25]</sup>. Some studies  
44  
45 453 also used clinical or magnetic resonance imaging (MRI)  
46  
47 454 evidence of neurologic damage to detect cognitive  
48  
49 455 impairment. The MoCA functions best as a screening test,  
50  
51 456 having exhibited excellent sensitivity in identifying MCI  
52  
53 457 and AD (Alzheimer's disease) at 90% and 100%, respectively  
54  
55  
56  
57  
58  
59  
60

1  
2  
3  
4 458 [26].

5  
6 459 The most popular hypothesis about the mechanisms  
7  
8  
9 460 underlying the links between SHS exposure and more  
10  
11 461 unsatisfactory cognitive performance lies in the notion  
12  
13  
14 462 that the carbon monoxide (CO) in tobacco smoke may  
15  
16  
17 463 interfere with the oxygen being delivered to the brain via  
18  
19 464 the blood. However, the reasons behind the different  
20  
21  
22 465 effect on various domains of brain function are far from  
23  
24  
25 466 clear. One possible explanation derives from research on  
26  
27 467 laboratory animals. Exposing animals to varying degrees of  
28  
29  
30 468 toxic mixtures of chemicals found in tobacco smoke may  
31  
32  
33 469 lead to reduced neuronal mass in specific regions of the  
34  
35 470 brain associated with learning and memory. Since the  
36  
37  
38 471 hippocampal region of the brain is known to be involved  
39  
40 472 in the mediation of memory [27] and learning, further  
41  
42  
43 473 research should be conducted in other regions dominating  
44  
45  
46 474 visuospatial and orientation ability. Another possible  
47  
48 475 mechanism is that prolonged exposure to SHS may be a  
49  
50  
51 476 significant risk factor for cardiovascular disease  
52  
53 477 (CVD) [28], which may therefore lead to a range of health  
54  
55  
56 478 and cognitive problems in later life. In the future, a  
57  
58  
59 479 longitudinal design may elucidate any associations by  
60

1  
2  
3  
4 480 observing long-term exposure to SHS and the incidence of  
5  
6 481 CVD, and whether this CVD may mediate or interact with SHS  
7  
8  
9 482 exposure to impact cognitive function.

10  
11 483 Several limitations need to be considered when interpreting  
12  
13  
14 484 this study and designing future studies. Firstly, exposure  
15  
16  
17 485 to SHS was evaluated based on self-report measures. This  
18  
19  
20 486 might be subject to recall bias and lead to over-or-  
21  
22 487 underestimation of exposure [29]. Therefore, further studies  
23  
24  
25 488 could include more biological assays, for example, cotinine  
26  
27 489 residue levels or nicotine residue in saliva or hair  
28  
29  
30 490 samples [30]. Previous research using serum cotinine as a  
31  
32  
33 491 biomarker of exposure to SHS found that higher levels of  
34  
35  
36 492 serum cotinine were associated with significantly worse  
37  
38 493 performance in reading, mathematics, and visual and spatial  
39  
40 494 abilities in children and adolescents [8]. However, no  
41  
42  
43 495 studies have used a combination of biomarker and self-  
44  
45  
46 496 reporting yet [31]. Some validated biomarkers could be used  
47  
48  
49 497 as proxies for AD neuropathological changes, such as  
50  
51 498 cerebrospinal fluid (CSF) amyloid-beta (A $\beta$ )42  
52  
53 499 concentrations or A $\beta$ 42/ A $\beta$ 40 ratio and amyloid load on  
54  
55  
56 500 positron emission tomography (PET) scans. These biomarkers  
57  
58  
59 501 could provide more reliable measures of cognitive  
60

1  
2  
3  
4 502 impairment<sup>[32]</sup>. Secondly, it may be impossible to control  
5  
6 503 for all potentially confounding variables. After adjusting  
7  
8  
9 504 for age, household expenditure, education, area, chronic  
10  
11 505 health condition and depressive symptoms, some other  
12  
13  
14 506 demographic or socioeconomic confounders may still have  
15  
16  
17 507 been neglected. However, this did not appear to affect the  
18  
19 508 magnitude of the association between SHS exposure and  
20  
21  
22 509 cognition <sup>[14]</sup>. Besides, the analyses only contained  
23  
24  
25 510 household SHS exposure, which precluded the analyses of the  
26  
27 511 influence of environmental smoke inhalation on smoking  
28  
29  
30 512 proclivity. Whether exposure to household SHS can hasten  
31  
32  
33 513 the onset of cognitive impairment for older Chinese women  
34  
35 514 could be further proved by running regression models in  
36  
37  
38 515 different age groups.

#### 39 40 516 **Acknowledgments :**

41  
42  
43 517 We would like to thank the professor Yaohui Zhao at Centre for Chinese Economic  
44  
45 518 Research, Peking University and Mr Benjamin Martin at Birmingham Women's and  
46  
47  
48 519 Children's Hospital for their thoughtful contributions to this study.

#### 49 50 520 **Conflict of Interest**

51  
52  
53 521 The authors have no conflicts of interest to declare.

#### 54 55 522 **Author's Contribution**

1  
2  
3  
4 523 Anying Bai wrote and participated in all aspects of this research, including the field  
5  
6 524 investigation. Dr Yangmu Huang reviewed and supervised this research. Yinzi Jin  
7  
8  
9 525 participated in the statistical analysis of this work and reviewed the final article.  
10

11  
12 526 **Data sharing statement**

13  
14 527 CHARLS data is available to the public online: <http://charls.pku.edu.cn>  
15  
16

17 528 **Funding Resources**

18  
19 529 This is a self-funded research.  
20  
21

22 530

23 531 **Reference**

24 532

25  
26 533 1 Fang EF, Scheibye-Knudsen M, Jahn HJ, et al. A research agenda for aging in China in the  
27

28  
29 534 21st century. *Ageing research reviews* 2015;24(Pt B):197-205. doi:

30  
31 535 10.1016/j.arr.2015.08.003 [published Online First: 2015/08/26]  
32  
33

34 536 2 Harada CN, Natelson Love MC, Triebel KL. Normal Cognitive Aging. *Clinics in Geriatric*

35  
36 537 *Medicine* 2013;29(4):737-52. doi: 10.1016/j.cger.2013.07.002  
37  
38

39 538 3 Robertson DA, Savva GM, Kenny RA. Frailty and cognitive impairment--a review of the

40  
41 539 evidence and causal mechanisms. *Ageing Res Rev* 2013;12(4):840-51. doi:

42  
43 540 10.1016/j.arr.2013.06.004 [published Online First: 2013/07/09]  
44  
45

46 541 4 Yin P, Ma Q, Wang L, et al. Chronic obstructive pulmonary disease and cognitive

47  
48 542 impairment in the Chinese elderly population: a large national survey. *International*

49  
50 543 *Journal of Chronic Obstructive Pulmonary Disease* 2016 doi: 10.2147/copd.S96237  
51  
52

53  
54 544 5 Bernardin F, Maheut-Bosser A, Paille Fo. Cognitive Impairments in Alcohol-Dependent

55  
56 545 Subjects. *Frontiers in Psychiatry* 2014;5 doi: 10.3389/fpsy.2014.00078  
57  
58

59 546 6 Tadic M, Cuspidi C, Hering D. Hypertension and cognitive dysfunction in elderly: blood  
60

- 1  
2  
3  
4 547 pressure management for this global burden. *BMC Cardiovasc Disord*  
5  
6 548 2016;16(1):208. doi: 10.1186/s12872-016-0386-0 [published Online First:  
7  
8  
9 549 2016/11/05]
- 10  
11 550 7 Modrego PJ, Ferrández J. Depression in Patients With Mild Cognitive Impairment Increases  
12  
13  
14 551 the Risk of Developing Dementia of Alzheimer Type: A Prospective Cohort Study.  
15  
16  
17 552 *Archives of Neurology* 2004;61(8):1290-93. doi: 10.1001/archneur.61.8.1290  
18
- 19 553 8 Ling J, Heffernan T. The Cognitive Deficits Associated with Second-Hand Smoking.  
20  
21  
22 554 *Frontiers in Psychiatry* 2016;7 doi: 10.3389/fpsy.2016.00046  
23
- 24 555 9 Durazzo TC, Meyerhoff DJ, Nixon SJ. A comprehensive assessment of neurocognition in  
25  
26  
27 556 middle-aged chronic cigarette smokers. *Drug Alcohol Depend* 2012;122(1-2):105-11.  
28  
29  
30 557 doi: 10.1016/j.drugalcdep.2011.09.019 [published Online First: 2011/10/14]  
31
- 32 558 10 Teo KK, Ounpuu S, Hawken S, et al. Tobacco use and risk of myocardial infarction in 52  
33  
34  
35 559 countries in the INTERHEART study: a case-control study. *Lancet (London, England)*  
36  
37  
38 560 2006;368(9536):647-58. doi: 10.1016/s0140-6736(06)69249-0 [published Online  
39  
40  
41 561 First: 2006/08/22]
- 42  
43 562 11 Kim BJ, Kang JG, Kim JH, et al. Association between Secondhand Smoke Exposure and  
44  
45  
46 563 Hypertension in 106,268 Korean Self-Reported Never-Smokers Verified by Cotinine.  
47  
48  
49 564 *Journal of clinical medicine* 2019;8(8) doi: 10.3390/jcm8081238 [published Online  
50  
51  
52 565 First: 2019/08/21]
- 53 566 12 Teo KK, Ounpuu S, Hawken S, et al. Tobacco use and risk of myocardial infarction in 52  
54  
55  
56 567 countries in the INTERHEART study: a case-control study. *The Lancet*  
57  
58  
59 568 2006;368(9536):647-58. doi: 10.1016/s0140-6736(06)69249-0  
60

- 1  
2  
3  
4 569 13 Heffernan TM, O'Neill TS. Everyday prospective memory and executive function deficits  
5  
6 570 associated with exposure to second-hand smoke. *Journal of addiction*  
7  
8  
9 571 2013;2013:160486. doi: 10.1155/2013/160486 [published Online First: 2013/01/01]  
10  
11 572 14 Yolton K, Dietrich K, Auinger P, et al. Exposure to environmental tobacco smoke and  
12  
13  
14 573 cognitive abilities among U.S. children and adolescents. *Environ Health Perspect*  
15  
16 574 2005;113(1):98-103. doi: 10.1289/ehp.7210 [published Online First: 2005/01/01]  
17  
18  
19 575 15 Llewellyn DJ, Lang IA, Langa KM, et al. Exposure to secondhand smoke and cognitive  
20  
21  
22 576 impairment in non-smokers: national cross sectional study with cotinine  
23  
24 577 measurement. *Bmj* 2009;338(feb12 2):b462-b62. doi: 10.1136/bmj.b462  
25  
26  
27 578 16 Malek AM, Cushman M, Lackland DT, et al. Secondhand Smoke Exposure and Stroke:  
28  
29  
30 579 The Reasons for Geographic and Racial Differences in Stroke (REGARDS) Study.  
31  
32 580 *American journal of preventive medicine* 2015;49(6):e89-97. doi:  
33  
34 581 10.1016/j.amepre.2015.04.014 [published Online First: 2015/06/29]  
35  
36  
37 582 17 He F, Li T, Lin J, et al. Passive Smoking Exposure in Living Environments Reduces  
38  
39  
40 583 Cognitive Function: A Prospective Cohort Study in Older Adults. *International journal*  
41  
42 584 *of environmental research and public health* 2020;17(4) doi: 10.3390/ijerph17041402  
43  
44 585 [published Online First: 2020/02/27]  
45  
46  
47 586 18 Pan X, Luo Y, Roberts AR. Secondhand Smoke and Women's Cognitive Function in  
48  
49  
50 587 China. *American Journal of Epidemiology* 2018;187(5):911-18. doi:  
51  
52 588 10.1093/aje/kwx377  
53  
54  
55 589 19 Zhao Y, Hu Y, Smith JP, et al. Cohort Profile: The China Health and Retirement  
56  
57  
58 590 Longitudinal Study (CHARLS). *International Journal of Epidemiology* 2012;43(1):61-  
59  
60



- 
- 1  
2  
3  
4 591 68. doi: 10.1093/ije/dys203  
5  
6 592 20 Ge S, Wei Z, Liu T, et al. Alcohol Use and Cognitive Functioning Among Middle-Aged and  
7  
8  
9 593 Older Adults in China: Findings of the China Health and Retirement Longitudinal  
10  
11 594 Study Baseline Survey. *Alcohol Clin Exp Res* 2018;42(10):2054-60. doi:  
12  
13 595 10.1111/acer.13861 [published Online First: 2018/08/07]  
14  
15  
16 596 21 Li J, Cacchione PZ, Hodgson N, et al. Afternoon Napping and Cognition in Chinese Older  
17  
18 597 Adults: Findings from the China Health and Retirement Longitudinal Study Baseline  
19  
20 598 Assessment. *J Am Geriatr Soc* 2017;65(2):373-80. doi: 10.1111/jgs.14368 [published  
21  
22 599 Online First: 2016/12/21]  
23  
24  
25 600 22 Moheet A, Mangia S, Seaquist ER. Impact of diabetes on cognitive function and brain  
26  
27 601 structure. *Annals of the New York Academy of Sciences* 2015;1353(1):60-71. doi:  
28  
29 602 10.1111/nyas.12807  
30  
31  
32 603 23 Peters-Founshtein G, Peer M, Rein Y, et al. Mental-orientation: A new approach to  
33  
34 604 assessing patients across the Alzheimer's disease spectrum. *Neuropsychology*  
35  
36 605 2018;32(6):690-99. doi: 10.1037/neu0000463 [published Online First: 2018/05/22]  
37  
38  
39 606 24 Burk JA, Blumenthal SA, Maness EB. Neuropharmacology of attention. *European journal*  
40  
41 607 *of pharmacology* 2018;835:162-68. doi: 10.1016/j.ejphar.2018.08.008 [published  
42  
43 608 Online First: 2018/08/10]  
44  
45  
46 609 25 Lövdén M, Rönnlund M, Wahlin A, et al. The extent of stability and change in episodic and  
47  
48 610 semantic memory in old age: demographic predictors of level and change. *The*  
49  
50 611 *journals of gerontology Series B, Psychological sciences and social sciences*  
51  
52 612 2004;59(3):P130-4. doi: 10.1093/geronb/59.3.p130 [published Online First:  
53  
54  
55  
56  
57  
58  
59  
60

- 
- 1  
2  
3  
4 613 2004/05/01]
- 5  
6 614 26 Li X, Jia S, Zhou Z, et al. The role of the Montreal Cognitive Assessment (MoCA) and its  
7  
8  
9 615 memory tasks for detecting mild cognitive impairment. *Neurol Sci* 2018;39(6):1029-  
10  
11 616 34. doi: 10.1007/s10072-018-3319-0 [published Online First: 2018/03/20]  
12  
13  
14 617 27 Trzepacz PT, Hochstetler H, Wang S, et al. Relationship between the Montreal Cognitive  
15  
16 618 Assessment and Mini-mental State Examination for assessment of mild cognitive  
17  
18 619 impairment in older adults. *BMC Geriatr* 2015;15(107):107. doi: 10.1186/s12877-015-  
19  
20 620 0103-3 [published Online First: 2015/09/09]  
21  
22  
23 621 28 Ziad S. Nasreddine M. The Montreal Cognitive Assessment (MoCA)- Concept and Clinical  
24  
25 622 Review. *the American Geriatrics Society* 2005;53(4):695-99.  
26  
27  
28 623 29 Staples MC, Mandyam CD. Thinking after Drinking: Impaired Hippocampal-Dependent  
29  
30 624 Cognition in Human Alcoholics and Animal Models of Alcohol Dependence. *Frontiers*  
31  
32 625 *in Psychiatry* 2016;7 doi: 10.3389/fpsyt.2016.00162  
33  
34  
35 626 30 Yankelevitz DF, Henschke CI, Yip R, et al. Second-Hand Tobacco Smoke in Never  
36  
37 627 Smokers Is a Significant Risk Factor for Coronary Artery Calcification. *JACC:*  
38  
39 628 *Cardiovascular Imaging* 2013;6(6):651-57. doi: 10.1016/j.jcmg.2013.02.004  
40  
41  
42 629 31 Akhtar WZ, Andresen EM, Cannell MB, et al. Association of blood cotinine level with  
43  
44 630 cognitive and physical performance in non-smoking older adults. *Environmental*  
45  
46 631 *Research* 2013;121:64-70. doi: 10.1016/j.envres.2012.10.013  
47  
48  
49 632 32 Banning LCP, Ramakers I, Deckers K, et al. Affective symptoms and AT(N) biomarkers in  
50  
51 633 mild cognitive impairment and Alzheimer's disease: A systematic literature review.  
52  
53 634 *Neuroscience and biobehavioral reviews* 2019;107:346-59. doi:  
54  
55  
56  
57  
58  
59  
60

---

1  
2  
3  
4 635 10.1016/j.neubiorev.2019.09.014 [published Online First: 2019/09/17]  
5  
6 636  
7  
8 637  
9  
10 638  
11  
12  
13 639  
14  
15  
16 640  
17  
18  
19  
20  
21  
22  
23  
24  
25  
26  
27  
28  
29  
30  
31  
32  
33  
34  
35  
36  
37  
38  
39  
40  
41  
42  
43  
44  
45  
46  
47  
48  
49  
50  
51  
52  
53  
54  
55  
56  
57  
58  
59  
60

For peer review only

Table 1. Characteristics of the Participants from 3 waves of CHARLS, 2011-2013-2015

| Variable                                  | 2011-2013<br>(N=2802) |           | 2011-2015<br>(N=2274) |           | 2013-2015<br>(N=1799) |           |
|-------------------------------------------|-----------------------|-----------|-----------------------|-----------|-----------------------|-----------|
|                                           | Count                 | Frequency | Count                 | Frequency | Count                 | Frequency |
| <b>Area</b>                               |                       |           |                       |           |                       |           |
| Urban                                     | 981                   | 35.01%    | 730                   | 32.10%    | 556                   | 30.91%    |
| Rural                                     | 1821                  | 64.99%    | 1544                  | 67.90%    | 1243                  | 69.09%    |
| <b>SHS</b>                                |                       |           |                       |           |                       |           |
| Less than 25 years                        | 759                   | 27.09%    | 531                   | 23.35%    | 262                   | 14.56%    |
| More than 25 years and less than 30 years | 634                   | 22.63%    | 573                   | 25.20%    | 385                   | 21.40%    |
| More than 30 years and less than 40 years | 911                   | 32.51%    | 800                   | 35.18%    | 768                   | 42.69%    |
| More than 40 years                        | 498                   | 17.77%    | 370                   | 16.27%    | 384                   | 21.35%    |
| <b>Education</b>                          |                       |           |                       |           |                       |           |
| Illiterate                                | 1552                  | 55.39%    | 1309                  | 57.56%    | 1004                  | 55.81%    |
| Primary education                         | 512                   | 18.27%    | 414                   | 18.21%    | 336                   | 18.68%    |
| Secondary or above                        | 738                   | 26.34%    | 551                   | 24.23%    | 459                   | 25.51%    |
| <b>Hypertension</b>                       |                       |           |                       |           |                       |           |
| No hypertension                           | 2124                  | 75.80%    | 1720                  | 75.64%    | 1365                  | 75.88%    |
| Hypertension with treatment               | 522                   | 18.63%    | 1720                  | 75.64%    | 358                   | 19.90%    |
| Hypertension without treatment            | 156                   | 5.57%     | 130                   | 5.72%     | 76                    | 4.22%     |
| <b>Diabetes</b>                           |                       |           |                       |           |                       |           |
| No Diabetes in baseline                   | 2643                  | 94.33%    | 2140                  | 94.11%    | 1704                  | 94.72%    |

|                                                 |       |                     |       |                     |       |                     |
|-------------------------------------------------|-------|---------------------|-------|---------------------|-------|---------------------|
| Have Diabetes with treatment                    | 143   | 5.10%               | 120   | 5.28%               | 86    | 4.78%               |
| Have Diabetes without treatment                 | 16    | 0.57%               | 14    | 0.62%               | 9     | 0.50%               |
|                                                 | Count | Mean (SD)           | Count | Mean (SD)           | Count | Mean (SD)           |
| Age                                             | 2802  | 55.84 (8.22)        | 2274  | 56.19 (7.75)        | 1799  | 57.90 (7.43)        |
| Annual Household Expenditure, yuan <sup>a</sup> | 2802  | 13786.99 (14197.29) | 2274  | 13060.14 (13639.33) | 1799  | 16632.84 (18568.24) |
| Visuospatial ability <sup>b</sup>               | 2802  | 0.51 (0.50)         | 2274  | 0.48 (0.50)         | 1799  | 0.49 (0.50)         |
| Orientation and attention <sup>c</sup>          | 2802  | 5.87 (3.29)         | 2274  | 5.84 (3.19)         | 1799  | 5.97 (3.14)         |
| Memory Scores <sup>d</sup>                      | 2802  | 3.33 (1.96)         | 2274  | 3.04 (1.93)         | 1799  | 3.15 (1.91)         |
| Baseline Visuospatial ability                   | 2802  | 0.57 (0.50)         | 2274  | 0.55 (0.50)         | 1799  | 0.54 (0.50)         |
| Baseline Orientation and attention              | 2802  | 6.39 (2.92)         | 2274  | 6.25 (2.90)         | 1799  | 6.16 (3.00)         |
| Baseline Memory Scores                          | 2802  | 3.27 (1.98)         | 2274  | 3.23 (1.92)         | 1799  | 3.50 (1.78)         |
| Baseline CES-D Score <sup>e</sup>               | 2802  | 12.09 (5.38)        | 2274  | 12.13 (5.45)        | 1799  | 10.90 (5.14)        |

Abbreviation: SHS, secondhand smoke.

a 1 US dollar = 6.3 yuan.

b The score range for visuospatial ability was 0-1.

c The score range for orientation and attention was 0-10. Higher scores indicate better mental status.

d The score range for episodic memory was 0-10. Higher scores indicate better memory function.

e A score of 10 or greater indicated the presence of depressive symptoms.

1  
2  
3  
4  
5  
6  
7  
8  
9  
10  
11  
12  
13  
14  
15  
16  
17  
18  
19  
20  
21  
22  
23  
24  
25  
26  
27  
28  
29  
30  
31  
32  
33  
34  
35  
36  
37  
38  
39  
40  
41  
42  
43  
44  
45  
46

Table 2. Adjusted Multivariable linear regression analysis of the relationship between smoking exposure and Visuospatial function and Orientation and Attention among older Chinese women (N = 6875), 2011-2013-2015

| VARIABLES                                 | Visuospatial Function |              |       | Orientation and Attention |              |       |
|-------------------------------------------|-----------------------|--------------|-------|---------------------------|--------------|-------|
|                                           | $\beta$ coefficient   | 95%CI        | t     | $\beta$ coefficient       | 95%CI        | t     |
| <b>Age</b>                                | -0.01 <sup>a</sup>    | -0.01, -0.00 | -6.73 | -0.02 <sup>a</sup>        | -0.03, -0.01 | -4.34 |
| <b>Expenditure</b>                        | 0.00                  | 0.00, 0.00   | 0.01  | 0.00 <sup>a</sup>         | 0.00, 0.00   | 0.77  |
| <b>SHS Exposure<sup>d</sup></b>           |                       |              |       |                           |              |       |
| <b>25 to &lt;30 years</b>                 | -0.01                 | -0.04, 0.02  | -0.72 | 0.05                      | -0.12, 0.21  | 0.56  |
| <b>≥30 to &lt;40 years</b>                | -0.02                 | -0.05, 0.02  | -0.95 | -0.03                     | -0.20, 0.13  | -0.38 |
| <b>≥ 40 years</b>                         | -0.04 <sup>c</sup>    | -0.08, 0.01  | -1.67 | -0.15                     | -0.38, 0.09  | -1.24 |
| <b>Baseline Visuospatial Function</b>     | 0.23 <sup>a</sup>     | 0.21, 0.26   | 17.93 |                           |              |       |
| <b>Baseline Orientation and Attention</b> |                       |              |       | 0.55 <sup>a</sup>         | 0.53, 0.57   | 44.86 |

|                                 |                    |             |       |                    |              |       |
|---------------------------------|--------------------|-------------|-------|--------------------|--------------|-------|
| <b>Urban<sup>e</sup></b>        | 0.06 <sup>a</sup>  | 0.04, 0.09  | 5.27  | 0.38 <sup>a</sup>  | 0.25, 0.51   | 5.72  |
| <b>Education<sup>f</sup></b>    |                    |             |       |                    |              |       |
| <b>Primary</b>                  | 0.23 <sup>a</sup>  | 0.20, 0.26  | 14.00 | 1.11 <sup>a</sup>  | 0.94, 1.27   | 12.91 |
| <b>Secondary or Above</b>       | 0.29 <sup>a</sup>  | 0.26, 0.32  | 18.51 | 1.18 <sup>a</sup>  | 1.01, 1.36   | 13.44 |
| <b>Hypertension<sup>g</sup></b> |                    |             |       |                    |              |       |
| <b>With Treatment</b>           | -0.03              | -0.09, 0.02 | -1.20 | 0.06               | -0.24, 0.35  | -0.38 |
| <b>Without Treatment</b>        | -0.02              | -0.06, 0.03 | -0.69 | 0.06               | -0.11, 0.24  | 0.04  |
| <b>Missing Group</b>            | -0.05 <sup>c</sup> | -0.12, 0.01 | -1.67 | 0.06               | -0.19, 0.30  | -0.01 |
| <b>Diabetes<sup>h</sup></b>     |                    |             |       |                    |              |       |
| <b>With Treatment</b>           | 0.02               | -0.03, 0.07 | 0.90  | 0.25 <sup>c</sup>  | -0.03, 0.52  | -1.77 |
| <b>Without Treatment</b>        | 0.03               | -0.04, 0.09 | 0.82  | 0.21               | -0.06, 0.48  | -0.23 |
| <b>Missing Group</b>            | 0.07               | -0.08, 0.21 | 0.88  | 0.50               | -0.22, 1.23  | 0.67  |
| <b>Baseline CES-D Score</b>     | -0.00 <sup>c</sup> | -0.00, 0.00 | -1.71 | -0.02 <sup>b</sup> | -0.03, -0.00 | -2.57 |
| <b>year = 2</b>                 | -0.02              | -0.04, 0.01 | -1.58 | 0.09               | -0.05, 0.22  | 1.29  |

Abbreviations: CI, confidence interval; SHS, secondhand smoke.

a.  $p < 0.01$

1  
2  
3  
4  
5 b.  $p < 0.05$

6 c.  $p < 0.1$

7 d. Referent: No SHS exposure or Less than 25 years.

8 e. Expenditure is expressed as the natural log of the annual household expenditure

9 f. Referent: Illiterate

10 g. Referent: Without hypertension

11 h. Referent: Without diabetes

12  
13  
14 I. This model adjusted for age, expenditure, living area, education, baseline hypertension, diabetes, depression status and baseline cognitive function.

15  
16  
17  
18  
19  
20  
21  
22  
23  
24  
25  
26  
27  
28  
29  
30  
31  
32  
33  
34  
35  
36  
37  
38  
39  
40  
41  
42  
43  
44  
45  
46

For peer review only



Table 3. Adjusted Multivariable linear regression analysis of the relationship between smoking exposure and Episodic memory and Overall cognitive function among older Chinese women (N = 6875), 2011-2013-2015

| VARIABLES                         | Episodic Memory        |              |        | Overall Cognition   |              |       |
|-----------------------------------|------------------------|--------------|--------|---------------------|--------------|-------|
|                                   | $\beta$<br>coefficient | 95%CI        | t      | $\beta$ coefficient | 95%CI        | t     |
| <b>Age</b>                        | -0.04 <sup>a</sup>     | -0.05, -0.03 | -11.37 | -0.06 <sup>a</sup>  | -0.07, -0.04 | -7.87 |
| <b>Expenditure</b>                | 0.00                   | 0.00, 0.00   | 1.30   | 0.00 <sup>a</sup>   | 0.00, 0.00   | 0.32  |
| <b>SHS Exposure<sup>d</sup></b>   |                        |              |        |                     |              |       |
| <b>25 to &lt;30 years</b>         | -0.04                  | -0.16, 0.08  | -0.67  | -0.01               | -0.25, 0.25  | -0.01 |
| <b>≥30 to &lt;40 years</b>        | 0.02                   | -0.09, 0.13  | 0.36   | -0.05               | -0.29, 0.19  | -0.41 |
| <b>≥ 40 years</b>                 | -0.16 <sup>b</sup>     | -0.31, -0.01 | -2.06  | -0.33 <sup>a</sup>  | -0.66, 0.01  | -1.93 |
| <b>Baseline Episodic Memory</b>   | 0.30 <sup>a</sup>      | 0.28, 0.32   | 25.22  |                     |              |       |
| <b>Baseline Overall Cognition</b> |                        |              |        | 0.55 <sup>a</sup>   | 0.46, 0.83   | 44.95 |

|    |                                 |                    |              |       |                   |             |       |
|----|---------------------------------|--------------------|--------------|-------|-------------------|-------------|-------|
| 1  |                                 |                    |              |       |                   |             |       |
| 2  |                                 |                    |              |       |                   |             |       |
| 3  |                                 |                    |              |       |                   |             |       |
| 4  |                                 |                    |              |       |                   |             |       |
| 5  |                                 |                    |              |       |                   |             |       |
| 6  | <b>Urban<sup>e</sup></b>        | 0.25 <sup>a</sup>  | 0.16, 0.34   | 5.60  | 0.65 <sup>a</sup> | 0.46, 0.83  | 6.68  |
| 7  |                                 |                    |              |       |                   |             |       |
| 8  | <b>Education<sup>f</sup></b>    |                    |              |       |                   |             |       |
| 9  | <b>Primary</b>                  | 0.70 <sup>a</sup>  | 0.58, 0.80   | 12.42 | 1.77 <sup>a</sup> | 1.53, 2.02  | 14.28 |
| 10 |                                 |                    |              |       |                   |             |       |
| 11 | <b>Secondary or Above</b>       | 0.97 <sup>a</sup>  | 0.86, 1.08   | 17.29 | 2.00 <sup>a</sup> | 1.74, 2.26  | 15.24 |
| 12 |                                 |                    |              |       |                   |             |       |
| 13 | <b>Hypertension<sup>g</sup></b> |                    |              |       |                   |             |       |
| 14 | <b>With Treatment</b>           | 0.04               | -0.16, 0.23  | 0.35  | 0.13              | -0.29, 0.56 | 0.62  |
| 15 |                                 |                    |              |       |                   |             |       |
| 16 | <b>Without Treatment</b>        | 0.06               | -0.06, 0.17  | 0.95  | 0.12              | -0.14, 0.38 | 0.93  |
| 17 |                                 |                    |              |       |                   |             |       |
| 18 | <b>Missing Group</b>            | 0.07               | -0.12, 0.25  | 0.70  | 0.10              | -0.27, 0.47 | 0.52  |
| 19 |                                 |                    |              |       |                   |             |       |
| 20 | <b>Diabetes<sup>h</sup></b>     |                    |              |       |                   |             |       |
| 21 | <b>With Treatment</b>           | -0.20 <sup>b</sup> | -0.38, 0.02  | -2.20 | -0.04             | -0.43, 0.36 | 0.62  |
| 22 |                                 |                    |              |       |                   |             |       |
| 23 | <b>Without Treatment</b>        | -0.07              | -0.25, 0.11  | -0.77 | 0.08              | -0.30, 0.47 | 0.43  |
| 24 |                                 |                    |              |       |                   |             |       |
| 25 | <b>Missing Group</b>            | 0.32               | -0.16, 0.80  | 1.30  | 0.87              | -0.11, 1.84 | 1.75  |
| 26 |                                 |                    |              |       |                   |             |       |
| 27 | <b>Baseline CES-D Score</b>     | -0.01 <sup>b</sup> | -0.01, 0.00  | -1.59 | -0.01             | -0.03, 0.00 | -2.57 |
| 28 |                                 |                    |              |       |                   |             |       |
| 29 | <b>year = 2</b>                 | -0.24              | -0.33, -0.15 | -5.21 | -0.17             | -0.37, 0.03 | -1.70 |
| 30 |                                 |                    |              |       |                   |             |       |
| 31 |                                 |                    |              |       |                   |             |       |
| 32 |                                 |                    |              |       |                   |             |       |
| 33 |                                 |                    |              |       |                   |             |       |
| 34 |                                 |                    |              |       |                   |             |       |
| 35 |                                 |                    |              |       |                   |             |       |
| 36 |                                 |                    |              |       |                   |             |       |
| 37 |                                 |                    |              |       |                   |             |       |
| 38 |                                 |                    |              |       |                   |             |       |
| 39 |                                 |                    |              |       |                   |             |       |
| 40 |                                 |                    |              |       |                   |             |       |
| 41 |                                 |                    |              |       |                   |             |       |
| 42 |                                 |                    |              |       |                   |             |       |
| 43 |                                 |                    |              |       |                   |             |       |
| 44 |                                 |                    |              |       |                   |             |       |
| 45 |                                 |                    |              |       |                   |             |       |
| 46 |                                 |                    |              |       |                   |             |       |

---

|                 |      |            |       |                   |            |       |
|-----------------|------|------------|-------|-------------------|------------|-------|
| <b>Constant</b> | 0.63 | 0.53, 0.74 | 11.54 | 6.48 <sup>a</sup> | 5.59, 7.37 | 14.28 |
|-----------------|------|------------|-------|-------------------|------------|-------|

---

Abbreviations: CI, confidence interval; SHS, secondhand smoke.

a.  $p < 0.01$

b.  $p < 0.05$

c.  $p < 0.1$

d. Referent: No SHS exposure or Less than 25 years.

e. Expenditure is expressed as the natural log of the annual household expenditure

f. Referent: Illiterate

g. Referent: Without hypertension

h. Referent: Without diabetes

I. This model adjusted for age, expenditure, living area, education, baseline hypertension, diabetes, depression status and baseline cognitive function.

STROBE Statement—Checklist of items that should be included in reports of *cohort studies*

|                              | Item No | Recommendation                                                                                                                                                                                                                                                                                                         | Page No |
|------------------------------|---------|------------------------------------------------------------------------------------------------------------------------------------------------------------------------------------------------------------------------------------------------------------------------------------------------------------------------|---------|
| <b>Title and abstract</b>    | 1       | (a) Indicate the study's design with a commonly used term in the title or the abstract<br>(b) Provide in the abstract an informative and balanced summary of what was done and what was found                                                                                                                          | 1-3     |
| <b>Introduction</b>          |         |                                                                                                                                                                                                                                                                                                                        |         |
| Background/rationale         | 2       | Explain the scientific background and rationale for the investigation being reported                                                                                                                                                                                                                                   | 4       |
| Objectives                   | 3       | State specific objectives, including any prespecified hypotheses                                                                                                                                                                                                                                                       | 5       |
| <b>Methods</b>               |         |                                                                                                                                                                                                                                                                                                                        |         |
| Study design                 | 4       | Present key elements of study design early in the paper                                                                                                                                                                                                                                                                | 6       |
| Setting                      | 5       | Describe the setting, locations, and relevant dates, including periods of recruitment, exposure, follow-up, and data collection                                                                                                                                                                                        | 6       |
| Participants                 | 6       | (a) Give the eligibility criteria, and the sources and methods of selection of participants. Describe methods of follow-up<br>(b) For matched studies, give matching criteria and number of exposed and unexposed                                                                                                      | 6       |
| Variables                    | 7       | Clearly define all outcomes, exposures, predictors, potential confounders, and effect modifiers. Give diagnostic criteria, if applicable                                                                                                                                                                               | 7-9     |
| Data sources/<br>measurement | 8*      | For each variable of interest, give sources of data and details of methods of assessment (measurement). Describe comparability of assessment methods if there is more than one group                                                                                                                                   | 7-9     |
| Bias                         | 9       | Describe any efforts to address potential sources of bias                                                                                                                                                                                                                                                              | 9       |
| Study size                   | 10      | Explain how the study size was arrived at                                                                                                                                                                                                                                                                              | 6       |
| Quantitative variables       | 11      | Explain how quantitative variables were handled in the analyses. If applicable, describe which groupings were chosen and why                                                                                                                                                                                           | 7-9     |
| Statistical methods          | 12      | (a) Describe all statistical methods, including those used to control for confounding<br>(b) Describe any methods used to examine subgroups and interactions<br>(c) Explain how missing data were addressed<br>(d) If applicable, explain how loss to follow-up was addressed<br>(e) Describe any sensitivity analyses | 9-10    |
| <b>Results</b>               |         |                                                                                                                                                                                                                                                                                                                        |         |
| Participants                 | 13*     | (a) Report numbers of individuals at each stage of study—eg numbers potentially eligible, examined for eligibility, confirmed eligible, included in the study, completing follow-up, and analysed<br>(b) Give reasons for non-participation at each stage<br>(c) Consider use of a flow diagram                        | 6       |
| Descriptive data             | 14*     | (a) Give characteristics of study participants (eg demographic, clinical, social) and information on exposures and potential confounders<br>(b) Indicate number of participants with missing data for each variable of interest<br>(c) Summarise follow-up time (eg, average and total amount)                         | 10-11   |
| Outcome data                 | 15*     | Report numbers of outcome events or summary measures over time                                                                                                                                                                                                                                                         | 11      |

|    |                          |    |                                                                                                                                                                                                              |       |
|----|--------------------------|----|--------------------------------------------------------------------------------------------------------------------------------------------------------------------------------------------------------------|-------|
| 1  | Main results             | 16 | (a) Give unadjusted estimates and, if applicable, confounder-adjusted estimates and their precision (eg, 95% confidence interval). Make clear which confounders were adjusted for and why they were included | 11    |
| 2  |                          |    | (b) Report category boundaries when continuous variables were categorized                                                                                                                                    |       |
| 3  |                          |    | (c) If relevant, consider translating estimates of relative risk into absolute risk for a meaningful time period                                                                                             |       |
| 4  |                          |    |                                                                                                                                                                                                              |       |
| 5  |                          |    |                                                                                                                                                                                                              |       |
| 6  |                          |    |                                                                                                                                                                                                              |       |
| 7  |                          |    |                                                                                                                                                                                                              |       |
| 8  |                          |    |                                                                                                                                                                                                              |       |
| 9  | Other analyses           | 17 | Report other analyses done—eg analyses of subgroups and interactions, and sensitivity analyses                                                                                                               | 11-12 |
| 10 |                          |    |                                                                                                                                                                                                              |       |
| 11 | <b>Discussion</b>        |    |                                                                                                                                                                                                              |       |
| 12 |                          |    |                                                                                                                                                                                                              |       |
| 13 | Key results              | 18 | Summarise key results with reference to study objectives                                                                                                                                                     | 12    |
| 14 | Limitations              | 19 | Discuss limitations of the study, taking into account sources of potential bias or imprecision. Discuss both direction and magnitude of any potential bias                                                   | 15-16 |
| 15 |                          |    |                                                                                                                                                                                                              |       |
| 16 | Interpretation           | 20 | Give a cautious overall interpretation of results considering objectives, limitations, multiplicity of analyses, results from similar studies, and other relevant evidence                                   | 13-15 |
| 17 |                          |    |                                                                                                                                                                                                              |       |
| 18 |                          |    |                                                                                                                                                                                                              |       |
| 19 | Generalisability         | 21 | Discuss the generalisability (external validity) of the study results                                                                                                                                        | 12    |
| 20 |                          |    |                                                                                                                                                                                                              |       |
| 21 | <b>Other information</b> |    |                                                                                                                                                                                                              |       |
| 22 | Funding                  | 22 | Give the source of funding and the role of the funders for the present study and, if applicable, for the original study on which the present article is based                                                | 17    |
| 23 |                          |    |                                                                                                                                                                                                              |       |
| 24 |                          |    |                                                                                                                                                                                                              |       |

\*Give information separately for exposed and unexposed groups.

**Note:** An Explanation and Elaboration article discusses each checklist item and gives methodological background and published examples of transparent reporting. The STROBE checklist is best used in conjunction with this article (freely available on the Web sites of PLoS Medicine at <http://www.plosmedicine.org/>, Annals of Internal Medicine at <http://www.annals.org/>, and Epidemiology at <http://www.epidem.com/>). Information on the STROBE Initiative is available at <http://www.strobe-statement.org>.
